# Supplementary material for: Transposable Prophages in Leptospira: An Ancient, Now Diverse, Group Predominant in Causative Agents of Weil’s Disease
Source: Int J Mol Sci. 2021 Dec 14;22(24):13434. doi: 10.3390/ijms222413434 (PMC8705779; doi:10.3390/ijms222413434)
Supplement: Supplementary file 1 [file ijms-22-13434-s001.zip › Table S1¿CS5.ods]

## Sheet: S1
BLASTp results comparing Leptospiraceae proteins in RefSeq to prophage WETA1’s transposase
The first two columns indicate the accession of the Leptospiraceae proteins from RefSeq and the id number of the predicted protein with Prodigal.
On the right side of these is the BLASTp output as is, with each column described by its header.
Locus	gene_number	query	subject	%id	alignment_size	mismatches	gaps	query_start	query_end	subject_start	subject_end	evalue	score
NZ_AFJK02000010.1	98	NZ_AFJK02000010.1_98	WE_007_TA_transposase	0.856	567	82	0	1	567	1	567	0.000E+00	1006
NZ_AFJK02000025.1	94	NZ_AFJK02000025.1_94	WE_007_TA_transposase	0.277	557	400	0	9	562	6	562	8.004E-67	221
NZ_AFJK02000056.1	28	NZ_AFJK02000056.1_28	WE_007_TA_transposase	0.267	566	397	0	21	586	16	557	5.359E-63	211
NZ_AFJM02000028.1	209	NZ_AFJM02000028.1_209	WE_007_TA_transposase	0.295	556	388	0	2	553	4	559	1.663E-75	245
NZ_AFJN02000022.1	31	NZ_AFJN02000022.1_31	WE_007_TA_transposase	0.299	556	386	0	2	553	4	559	3.076E-77	250
NZ_AFJN02000040.1	2	NZ_AFJN02000040.1_2	WE_007_TA_transposase	0.891	73	8	0	1	73	1	73	1.187E-43	138
NZ_AFJN02000041.1	1	NZ_AFJN02000041.1_1	WE_007_TA_transposase	0.826	190	33	0	1	190	205	394	1.078E-111	325
NZ_AFJO01000056.1	9	NZ_AFJO01000056.1_9	WE_007_TA_transposase	0.891	412	45	0	1	412	1	412	9.491E-279	766
NZ_AFJO01000137.1	1	NZ_AFJO01000137.1_1	WE_007_TA_transposase	0.840	156	25	0	1	156	412	567	2.449E-92	273
NZ_AFJO01000477.1	1	NZ_AFJO01000477.1_1	WE_007_TA_transposase	0.286	443	311	0	1	443	121	557	2.065E-55	186
NZ_AFJO01000689.1	17	NZ_AFJO01000689.1_17	WE_007_TA_transposase	0.290	563	392	0	4	566	6	558	1.020E-73	240
NZ_AFLO01000023.1	83	NZ_AFLO01000023.1_83	WE_007_TA_transposase	0.269	596	410	0	4	599	6	567	4.577E-68	225
NZ_AFLQ01000008.1	14	NZ_AFLQ01000008.1_14	WE_007_TA_transposase	0.297	556	387	0	2	553	4	559	4.403E-76	246
NZ_AFLS02000008.1	147	NZ_AFLS02000008.1_147	WE_007_TA_transposase	0.267	566	397	0	21	586	16	557	2.813E-63	212
NZ_AFLU02000001.1	50	NZ_AFLU02000001.1_50	WE_007_TA_transposase	0.856	567	82	0	1	567	1	567	0.000E+00	1006
NZ_AFLU02000045.1	33	NZ_AFLU02000045.1_33	WE_007_TA_transposase	0.267	566	397	0	21	586	16	557	5.359E-63	211
NZ_AFLU02000058.1	48	NZ_AFLU02000058.1_48	WE_007_TA_transposase	0.277	557	400	0	9	562	6	562	8.004E-67	221
NZ_AFLV02000005.1	26	NZ_AFLV02000005.1_26	WE_007_TA_transposase	0.267	568	398	0	21	588	16	559	2.813E-63	212
NZ_AFLV02000008.1	30	NZ_AFLV02000008.1_30	WE_007_TA_transposase	0.295	556	388	0	2	553	4	559	2.317E-75	244
NZ_AFLV02000013.1	55	NZ_AFLV02000013.1_55	WE_007_TA_transposase	0.968	567	18	0	1	567	1	567	0.000E+00	1157
NZ_AFLV02000038.1	143	NZ_AFLV02000038.1_143	WE_007_TA_transposase	0.295	556	388	0	2	553	4	559	2.317E-75	244
NZ_AFLV02000081.1	205	NZ_AFLV02000081.1_205	WE_007_TA_transposase	0.295	556	388	0	2	553	4	559	2.317E-75	244
NZ_AFLZ02000039.1	131	NZ_AFLZ02000039.1_131	WE_007_TA_transposase	0.266	566	397	0	21	586	16	557	1.943E-62	209
NZ_AHMF02000008.1	27	NZ_AHMF02000008.1_27	WE_007_TA_transposase	0.269	568	397	0	21	588	16	559	2.125E-64	215
NZ_AHMF02000092.1	71	NZ_AHMF02000092.1_71	WE_007_TA_transposase	0.278	565	400	0	2	566	4	558	1.988E-68	226
NZ_AHMG02000041.1	48	NZ_AHMG02000041.1_48	WE_007_TA_transposase	0.277	557	400	0	9	562	6	562	8.004E-67	221
NZ_AHMG02000056.1	157	NZ_AHMG02000056.1_157	WE_007_TA_transposase	0.267	566	397	0	21	586	16	557	5.359E-63	211
NZ_AHMG02000065.1	99	NZ_AHMG02000065.1_99	WE_007_TA_transposase	0.856	567	82	0	1	567	1	567	0.000E+00	1006
NZ_AHMH02000107.1	19	NZ_AHMH02000107.1_19	WE_007_TA_transposase	0.278	565	400	0	2	566	4	558	1.988E-68	226
NZ_AHMH02000129.1	22	NZ_AHMH02000129.1_22	WE_007_TA_transposase	0.269	568	397	0	21	588	16	559	2.125E-64	215
NZ_AHMQ02000007.1	64	NZ_AHMQ02000007.1_64	WE_007_TA_transposase	0.268	566	396	0	21	586	16	557	1.069E-63	213
NZ_AHMU02000022.1	206	NZ_AHMU02000022.1_206	WE_007_TA_transposase	0.282	565	398	0	2	566	4	558	1.446E-70	231
NZ_AHMU02000043.1	1	NZ_AHMU02000043.1_1	WE_007_TA_transposase	0.344	297	194	0	1	296	219	515	2.911E-50	167
NZ_AHMX02000036.1	145	NZ_AHMX02000036.1_145	WE_007_TA_transposase	0.289	563	392	0	4	566	6	558	2.750E-73	239
NZ_AHMX02000092.1	50	NZ_AHMX02000092.1_50	WE_007_TA_transposase	0.297	556	387	0	2	553	4	559	4.403E-76	246
NZ_AHNA02000062.1	32	NZ_AHNA02000062.1_32	WE_007_TA_transposase	0.266	566	397	0	21	586	16	557	1.408E-62	210
NZ_AHNB02000037.1	77	NZ_AHNB02000037.1_77	WE_007_TA_transposase	0.266	566	397	0	21	586	16	557	1.408E-62	210
NZ_AHNC02000035.1	67	NZ_AHNC02000035.1_67	WE_007_TA_transposase	0.968	567	18	0	1	567	1	567	0.000E+00	1157
NZ_AHNC02000063.1	12	NZ_AHNC02000063.1_12	WE_007_TA_transposase	0.267	579	404	0	21	599	16	567	1.538E-64	215
NZ_AHND02000058.1	174	NZ_AHND02000058.1_174	WE_007_TA_transposase	0.266	566	397	0	21	586	16	557	1.408E-62	210
NZ_AHNF02000004.1	21	NZ_AHNF02000004.1_21	WE_007_TA_transposase	0.874	567	71	0	1	567	1	567	0.000E+00	1030
NZ_AHNF02000040.1	79	NZ_AHNF02000040.1_79	WE_007_TA_transposase	0.295	556	389	0	2	554	4	559	3.306E-75	244
NZ_AHNH02000077.1	144	NZ_AHNH02000077.1_144	WE_007_TA_transposase	0.266	566	397	0	21	586	16	557	1.943E-62	209
NZ_AHNH02000088.1	48	NZ_AHNH02000088.1_48	WE_007_TA_transposase	0.291	563	391	0	4	566	6	558	1.949E-74	242
NZ_AHNJ02000028.1	166	NZ_AHNJ02000028.1_166	WE_007_TA_transposase	0.296	556	389	0	2	554	4	559	1.221E-75	245
NZ_AHNL02000030.1	252	NZ_AHNL02000030.1_252	WE_007_TA_transposase	0.266	566	397	0	21	586	16	557	1.408E-62	210
NZ_AHNQ02000025.1	45	NZ_AHNQ02000025.1_45	WE_007_TA_transposase	0.266	566	397	0	21	586	16	557	1.408E-62	210
NZ_AHNR02000028.1	141	NZ_AHNR02000028.1_141	WE_007_TA_transposase	0.266	566	397	0	21	586	16	557	1.408E-62	210
NZ_AHNR02000040.1	30	NZ_AHNR02000040.1_30	WE_007_TA_transposase	0.290	563	392	0	4	566	6	558	1.020E-73	240
NZ_AHNR02000045.1	122	NZ_AHNR02000045.1_122	WE_007_TA_transposase	0.249	473	351	0	9	481	6	473	1.096E-44	157
NZ_AHNS02000053.1	21	NZ_AHNS02000053.1_21	WE_007_TA_transposase	0.875	567	71	0	1	567	1	567	0.000E+00	1031
NZ_AHNS02000072.1	89	NZ_AHNS02000072.1_89	WE_007_TA_transposase	0.266	566	397	0	21	586	16	557	1.408E-62	210
NZ_AHNT02000076.1	66	NZ_AHNT02000076.1_66	WE_007_TA_transposase	0.296	556	389	0	2	554	4	559	1.221E-75	245
NZ_AHNU02000034.1	177	NZ_AHNU02000034.1_177	WE_007_TA_transposase	0.755	567	139	0	1	567	1	567	5.757E-316	869
NZ_AHNU02000038.1	26	NZ_AHNU02000038.1_26	WE_007_TA_transposase	0.940	567	34	0	1	567	1	567	0.000E+00	1119
NZ_AHNU02000052.1	40	NZ_AHNU02000052.1_40	WE_007_TA_transposase	0.267	579	404	0	21	599	16	567	8.052E-65	216
NZ_AHNU02000070.1	7	NZ_AHNU02000070.1_7	WE_007_TA_transposase	0.294	556	389	0	2	553	4	559	4.500E-75	244
NZ_AHNV02000054.1	17	NZ_AHNV02000054.1_17	WE_007_TA_transposase	0.266	566	397	0	21	586	16	557	1.408E-62	210
NZ_AHNV02000129.1	50	NZ_AHNV02000129.1_50	WE_007_TA_transposase	0.875	567	71	0	1	567	1	567	0.000E+00	1032
NZ_AHNW02000078.1	8	NZ_AHNW02000078.1_8	WE_007_TA_transposase	0.266	566	397	0	21	586	16	557	1.408E-62	210
NZ_AHNW02000115.1	51	NZ_AHNW02000115.1_51	WE_007_TA_transposase	0.292	563	391	0	4	566	6	558	7.213E-75	243
NZ_AHNX02000025.1	16	NZ_AHNX02000025.1_16	WE_007_TA_transposase	0.845	56	9	0	1	56	512	567	4.846E-31	100
NZ_AHNX02000072.1	1	NZ_AHNX02000072.1_1	WE_007_TA_transposase	0.884	434	50	0	1	434	1	434	2.877E-291	799
NZ_AHNX02000134.1	3	NZ_AHNX02000134.1_3	WE_007_TA_transposase	0.343	319	206	0	1	319	132	446	3.970E-54	179
NZ_AHNX02000171.1	17	NZ_AHNX02000171.1_17	WE_007_TA_transposase	0.292	563	391	0	4	566	6	558	7.213E-75	243
NZ_AHOA02000010.1	39	NZ_AHOA02000010.1_39	WE_007_TA_transposase	0.281	565	398	0	2	566	4	558	5.386E-70	230
NZ_AHOA02000025.1	117	NZ_AHOA02000025.1_117	WE_007_TA_transposase	0.830	566	96	0	1	566	1	566	0.000E+00	969
NZ_AHOE02000008.1	144	NZ_AHOE02000008.1_144	WE_007_TA_transposase	0.823	566	100	0	1	566	1	566	0.000E+00	959
NZ_AHOF02000013.1	91	NZ_AHOF02000013.1_91	WE_007_TA_transposase	0.281	565	398	0	2	566	4	558	5.386E-70	230
NZ_AHOF02000021.1	103	NZ_AHOF02000021.1_103	WE_007_TA_transposase	0.267	585	405	0	4	588	6	559	2.204E-65	218
NZ_AHOJ02000032.1	249	NZ_AHOJ02000032.1_249	WE_007_TA_transposase	0.286	565	396	0	2	566	4	558	1.996E-72	237
NZ_AHOM02000004.1	1124	NZ_AHOM02000004.1_1124	WE_007_TA_transposase	0.269	596	410	0	4	599	6	567	4.577E-68	225
NZ_AHON02000013.1	272	NZ_AHON02000013.1_272	WE_007_TA_transposase	0.281	565	398	0	2	566	4	558	5.386E-70	230
NZ_AHON02000063.1	93	NZ_AHON02000063.1_93	WE_007_TA_transposase	0.825	566	99	0	1	566	1	566	0.000E+00	963
NZ_AHOO02000005.1	195	NZ_AHOO02000005.1_195	WE_007_TA_transposase	0.269	596	410	0	4	599	6	567	4.577E-68	225
NZ_AHOR02000026.1	102	NZ_AHOR02000026.1_102	WE_007_TA_transposase	0.265	554	404	0	9	559	6	559	4.840E-61	205
NZ_AHOR02000076.1	20	NZ_AHOR02000076.1_20	WE_007_TA_transposase	0.273	568	395	0	21	588	16	559	2.274E-66	220
NZ_AHOS02000002.1	510	NZ_AHOS02000002.1_510	WE_007_TA_transposase	0.258	585	410	0	4	588	6	559	3.497E-61	206
NZ_AHPX01000017.1	14	NZ_AHPX01000017.1_14	WE_007_TA_transposase	0.297	556	387	0	2	553	4	559	4.403E-76	246
NZ_AHPY01000016.1	2	NZ_AHPY01000016.1_2	WE_007_TA_transposase	0.297	556	387	0	2	553	4	559	4.403E-76	246
NZ_AHQD01000043.1	64	NZ_AHQD01000043.1_64	WE_007_TA_transposase	0.266	566	397	0	21	586	16	557	1.408E-62	210
NZ_AHQD01000045.1	22	NZ_AHQD01000045.1_22	WE_007_TA_transposase	0.296	556	389	0	2	554	4	559	1.221E-75	245
NZ_AHQE01000034.1	14	NZ_AHQE01000034.1_14	WE_007_TA_transposase	0.297	556	387	0	2	553	4	559	4.403E-76	246
NZ_AHQF01000019.1	2	NZ_AHQF01000019.1_2	WE_007_TA_transposase	0.297	556	387	0	2	553	4	559	4.403E-76	246
NZ_AHQH01000034.1	95	NZ_AHQH01000034.1_95	WE_007_TA_transposase	0.268	566	396	0	21	586	16	557	1.069E-63	213
NZ_AHQJ01000017.1	14	NZ_AHQJ01000017.1_14	WE_007_TA_transposase	0.873	567	72	0	1	567	1	567	0.000E+00	1030
NZ_AHQK01000146.1	36	NZ_AHQK01000146.1_36	WE_007_TA_transposase	0.825	566	99	0	1	566	1	566	0.000E+00	963
NZ_AHQK01000203.1	10	NZ_AHQK01000203.1_10	WE_007_TA_transposase	0.261	584	409	0	4	587	6	559	1.384E-62	210
NZ_AHQL01000096.1	19	NZ_AHQL01000096.1_19	WE_007_TA_transposase	0.820	566	102	0	1	566	1	566	0.000E+00	955
NZ_AHQM01000151.1	19	NZ_AHQM01000151.1_19	WE_007_TA_transposase	0.266	566	397	0	21	586	16	557	1.943E-62	209
NZ_AHQN01000040.1	22	NZ_AHQN01000040.1_22	WE_007_TA_transposase	0.249	473	351	0	9	481	6	473	1.096E-44	157
NZ_AHQN01000315.1	26	NZ_AHQN01000315.1_26	WE_007_TA_transposase	0.291	563	391	0	4	566	6	558	1.949E-74	242
NZ_AHQN01000324.1	26	NZ_AHQN01000324.1_26	WE_007_TA_transposase	0.266	566	397	0	21	586	16	557	1.943E-62	209
NZ_AHQS01000112.1	14	NZ_AHQS01000112.1_14	WE_007_TA_transposase	0.290	563	392	0	4	566	6	558	1.020E-73	240
NZ_AHQS01000297.1	48	NZ_AHQS01000297.1_48	WE_007_TA_transposase	0.875	567	71	0	1	567	1	567	0.000E+00	1032
NZ_AHQS01000475.1	16	NZ_AHQS01000475.1_16	WE_007_TA_transposase	0.266	566	397	0	21	586	16	557	1.408E-62	210
NZ_AHQS01000797.1	40	NZ_AHQS01000797.1_40	WE_007_TA_transposase	0.249	473	351	0	9	481	6	473	1.096E-44	157
NZ_AHQT01000210.1	40	NZ_AHQT01000210.1_40	WE_007_TA_transposase	0.268	554	403	0	9	559	6	559	3.657E-62	208
NZ_AHQV01000373.1	47	NZ_AHQV01000373.1_47	WE_007_TA_transposase	0.266	566	397	0	21	586	16	557	1.408E-62	210
NZ_AHQW01000149.1	47	NZ_AHQW01000149.1_47	WE_007_TA_transposase	0.266	566	397	0	21	586	16	557	1.408E-62	210
NZ_AHQX01000017.1	3	NZ_AHQX01000017.1_3	WE_007_TA_transposase	0.294	556	389	0	2	553	4	559	4.500E-75	244
NZ_AHQX01000087.1	73	NZ_AHQX01000087.1_73	WE_007_TA_transposase	0.267	579	404	0	21	599	16	567	8.052E-65	216
NZ_AHQX01000230.1	9	NZ_AHQX01000230.1_9	WE_007_TA_transposase	0.761	567	135	0	36	602	1	567	1.092E-318	878
NZ_AHQY01000020.1	4	NZ_AHQY01000020.1_4	WE_007_TA_transposase	0.335	384	251	0	2	380	4	387	1.281E-63	207
NZ_AKWG02000019.1	10	NZ_AKWG02000019.1_10	WE_007_TA_transposase	0.287	367	257	0	11	377	197	557	2.263E-45	156
NZ_AKWG02000023.1	19	NZ_AKWG02000023.1_19	WE_007_TA_transposase	0.279	312	220	0	35	346	252	557	6.343E-36	127
NZ_AKWG02000087.1	9	NZ_AKWG02000087.1_9	WE_007_TA_transposase	0.285	367	257	0	11	377	197	557	1.096E-44	154
NZ_AKWH02000005.1	7	NZ_AKWH02000005.1_7	WE_007_TA_transposase	0.270	566	395	0	21	586	16	557	2.125E-64	215
NZ_AKWH02000007.1	18	NZ_AKWH02000007.1_18	WE_007_TA_transposase	0.270	566	395	0	21	586	16	557	2.125E-64	215
NZ_AKWH02000041.1	174	NZ_AKWH02000041.1_174	WE_007_TA_transposase	0.293	556	390	0	2	554	4	559	1.736E-74	242
NZ_AKWH02000068.1	7	NZ_AKWH02000068.1_7	WE_007_TA_transposase	0.270	566	395	0	21	586	16	557	2.125E-64	215
NZ_AKWH02000078.1	73	NZ_AKWH02000078.1_73	WE_007_TA_transposase	0.270	566	395	0	21	586	16	557	2.125E-64	215
NZ_AKWI02000042.1	21	NZ_AKWI02000042.1_21	WE_007_TA_transposase	0.281	565	398	0	2	566	4	558	5.386E-70	230
NZ_AKWI02000042.1	132	NZ_AKWI02000042.1_132	WE_007_TA_transposase	0.485	54	25	0	6	55	79	132	1.339E-13	51
NZ_AKWI02000042.1	133	NZ_AKWI02000042.1_133	WE_007_TA_transposase	0.830	566	96	0	1	566	1	566	0.000E+00	969
NZ_AKWJ02000028.1	283	NZ_AKWJ02000028.1_283	WE_007_TA_transposase	0.258	585	410	0	4	588	6	559	3.497E-61	206
NZ_AKWL02000027.1	14	NZ_AKWL02000027.1_14	WE_007_TA_transposase	0.266	566	397	0	21	586	16	557	1.943E-62	209
NZ_AKWL02000040.1	46	NZ_AKWL02000040.1_46	WE_007_TA_transposase	0.234	557	423	0	9	561	6	562	4.501E-47	164
NZ_AKWL02000048.1	134	NZ_AKWL02000048.1_134	WE_007_TA_transposase	0.887	567	64	0	1	567	1	567	0.000E+00	1047
NZ_AKWM02000078.1	191	NZ_AKWM02000078.1_191	WE_007_TA_transposase	0.867	567	75	0	1	567	1	567	0.000E+00	1020
NZ_AKWQ02000019.1	281	NZ_AKWQ02000019.1_281	WE_007_TA_transposase	0.268	566	396	0	21	586	16	557	2.038E-63	212
NZ_AKWR02000090.1	17	NZ_AKWR02000090.1_17	WE_007_TA_transposase	0.267	566	397	0	21	586	16	557	2.813E-63	212
NZ_AKWS02000007.1	105	NZ_AKWS02000007.1_105	WE_007_TA_transposase	0.266	585	406	0	4	588	6	559	3.048E-65	217
NZ_AKWS02000035.1	122	NZ_AKWS02000035.1_122	WE_007_TA_transposase	0.826	566	98	0	1	566	1	566	0.000E+00	964
NZ_AKWT02000007.1	27	NZ_AKWT02000007.1_27	WE_007_TA_transposase	0.281	565	398	0	2	566	4	558	5.386E-70	230
NZ_AKWT02000051.1	280	NZ_AKWT02000051.1_280	WE_007_TA_transposase	0.831	566	95	0	1	566	1	566	0.000E+00	970
NZ_AKWV02000040.1	74	NZ_AKWV02000040.1_74	WE_007_TA_transposase	0.281	565	398	0	2	566	4	558	5.386E-70	230
NZ_AKWV02000053.1	82	NZ_AKWV02000053.1_82	WE_007_TA_transposase	0.268	583	403	0	4	586	6	557	8.333E-66	219
NZ_AKWY02000016.1	46	NZ_AKWY02000016.1_46	WE_007_TA_transposase	0.295	556	389	0	2	554	4	559	1.702E-75	245
NZ_AKWY02000018.1	46	NZ_AKWY02000018.1_46	WE_007_TA_transposase	0.296	556	389	0	2	554	4	559	6.286E-76	246
NZ_AKWY02000031.1	186	NZ_AKWY02000031.1_186	WE_007_TA_transposase	0.296	556	389	0	2	554	4	559	6.286E-76	246
NZ_AKWY02000034.1	598	NZ_AKWY02000034.1_598	WE_007_TA_transposase	0.296	556	389	0	2	554	4	559	6.286E-76	246
NZ_AKXB02000004.1	37	NZ_AKXB02000004.1_37	WE_007_TA_transposase	0.273	568	395	0	21	588	16	559	2.274E-66	220
NZ_AKXB02000008.1	110	NZ_AKXB02000008.1_110	WE_007_TA_transposase	0.278	565	400	0	2	566	4	558	2.758E-68	225
NZ_AKXC02000018.1	86	NZ_AKXC02000018.1_86	WE_007_TA_transposase	0.290	563	392	0	4	566	6	558	1.020E-73	240
NZ_AKXC02000051.1	29	NZ_AKXC02000051.1_29	WE_007_TA_transposase	0.266	566	397	0	21	586	16	557	1.408E-62	210
NZ_AKXC02000057.1	81	NZ_AKXC02000057.1_81	WE_007_TA_transposase	0.875	567	71	0	1	567	1	567	0.000E+00	1032
NZ_AKXF02000030.1	20	NZ_AKXF02000030.1_20	WE_007_TA_transposase	0.293	556	390	0	2	553	4	559	1.696E-74	242
NZ_AKXG02000002.1	116	NZ_AKXG02000002.1_116	WE_007_TA_transposase	0.266	566	397	0	21	586	16	557	1.408E-62	210
NZ_AKXG02000014.1	133	NZ_AKXG02000014.1_133	WE_007_TA_transposase	0.875	567	71	0	1	567	1	567	0.000E+00	1032
NZ_AKXG02000054.1	72	NZ_AKXG02000054.1_72	WE_007_TA_transposase	0.290	563	392	0	4	566	6	558	1.020E-73	240
NZ_ANCE01000079.1	44	NZ_ANCE01000079.1_44	WE_007_TA_transposase	0.312	556	379	0	2	553	4	559	1.749E-83	267
NZ_ANCE01000096.1	15	NZ_ANCE01000096.1_15	WE_007_TA_transposase	0.312	556	379	0	2	553	4	559	1.749E-83	267
NZ_ANCE01000169.1	15	NZ_ANCE01000169.1_15	WE_007_TA_transposase	0.312	556	379	0	2	553	4	559	1.749E-83	267
NZ_ANIG01000026.1	38	NZ_ANIG01000026.1_38	WE_007_TA_transposase	0.268	554	403	0	9	559	6	559	3.657E-62	208
NZ_ANIK01000045.1	11	NZ_ANIK01000045.1_11	WE_007_TA_transposase	0.262	585	408	0	4	588	6	559	3.883E-63	211
NZ_ANMV01000107.1	58	NZ_ANMV01000107.1_58	WE_007_TA_transposase	0.267	566	397	0	21	586	16	557	5.359E-63	211
NZ_ANMV01000155.1	39	NZ_ANMV01000155.1_39	WE_007_TA_transposase	0.277	557	400	0	9	562	6	562	8.004E-67	221
NZ_ANMV01000156.1	44	NZ_ANMV01000156.1_44	WE_007_TA_transposase	0.856	567	82	0	1	567	1	567	0.000E+00	1006
NZ_ANMV01000199.1	16	NZ_ANMV01000199.1_16	WE_007_TA_transposase	0.856	567	82	0	1	567	1	567	0.000E+00	1006
NZ_ANMW01000009.1	105	NZ_ANMW01000009.1_105	WE_007_TA_transposase	0.856	567	82	0	1	567	1	567	0.000E+00	1006
NZ_ANMW01000068.1	22	NZ_ANMW01000068.1_22	WE_007_TA_transposase	0.267	566	397	0	21	586	16	557	5.359E-63	211
NZ_ANMW01000083.1	45	NZ_ANMW01000083.1_45	WE_007_TA_transposase	0.856	567	82	0	1	567	1	567	0.000E+00	1006
NZ_ANMW01000091.1	26	NZ_ANMW01000091.1_26	WE_007_TA_transposase	0.856	567	82	0	1	567	1	567	0.000E+00	1006
NZ_ANMW01000217.1	8	NZ_ANMW01000217.1_8	WE_007_TA_transposase	0.277	557	400	0	9	562	6	562	8.004E-67	221
NZ_ANMX01000112.1	44	NZ_ANMX01000112.1_44	WE_007_TA_transposase	0.856	567	82	0	1	567	1	567	0.000E+00	1006
NZ_ANMX01000157.1	16	NZ_ANMX01000157.1_16	WE_007_TA_transposase	0.856	567	82	0	1	567	1	567	0.000E+00	1006
NZ_ANMX01000158.1	22	NZ_ANMX01000158.1_22	WE_007_TA_transposase	0.267	566	397	0	21	586	16	557	5.359E-63	211
NZ_ANMX01000162.1	16	NZ_ANMX01000162.1_16	WE_007_TA_transposase	0.856	567	82	0	1	567	1	567	0.000E+00	1006
NZ_ANMX01000206.1	6	NZ_ANMX01000206.1_6	WE_007_TA_transposase	0.277	557	400	0	9	562	6	562	8.004E-67	221
NZ_ANMY01000031.1	33	NZ_ANMY01000031.1_33	WE_007_TA_transposase	0.267	568	398	0	21	588	16	559	2.813E-63	212
NZ_ANMY01000092.1	14	NZ_ANMY01000092.1_14	WE_007_TA_transposase	0.509	63	28	0	5	63	79	141	1.243E-17	63
NZ_ANMY01000092.1	15	NZ_ANMY01000092.1_15	WE_007_TA_transposase	0.940	567	34	0	1	567	1	567	0.000E+00	1120
NZ_ANNW01000049.1	215	NZ_ANNW01000049.1_215	WE_007_TA_transposase	0.284	565	397	0	2	566	4	558	2.790E-71	233
NZ_ANOJ01000066.1	48	NZ_ANOJ01000066.1_48	WE_007_TA_transposase	0.265	566	398	0	21	586	16	557	7.028E-62	208
NZ_AOHB02000043.1	21	NZ_AOHB02000043.1_21	WE_007_TA_transposase	0.837	319	52	0	1	319	249	567	2.756E-197	553
NZ_AOHB02000048.1	64	NZ_AOHB02000048.1_64	WE_007_TA_transposase	0.828	566	97	0	1	566	1	566	0.000E+00	966
NZ_AOHB02000057.1	74	NZ_AOHB02000057.1_74	WE_007_TA_transposase	0.281	565	398	0	2	566	4	558	7.481E-70	229
NZ_AOHD02000025.1	16	NZ_AOHD02000025.1_16	WE_007_TA_transposase	0.262	585	408	0	4	588	6	559	3.883E-63	211
NZ_AOHH01000122.1	21	NZ_AOHH01000122.1_21	WE_007_TA_transposase	0.280	565	399	0	2	566	4	558	2.003E-69	228
NZ_AOHI01000071.1	69	NZ_AOHI01000071.1_69	WE_007_TA_transposase	0.268	583	403	0	4	586	6	557	8.333E-66	219
NZ_AOHI01000116.1	79	NZ_AOHI01000116.1_79	WE_007_TA_transposase	0.281	565	398	0	2	566	4	558	5.386E-70	230
NZ_AOUB01000122.1	27	NZ_AOUB01000122.1_27	WE_007_TA_transposase	0.306	404	273	0	2	405	4	397	7.388E-57	189
NZ_AOUT01000044.1	24	NZ_AOUT01000044.1_24	WE_007_TA_transposase	0.252	473	349	0	9	481	6	473	1.311E-45	160
NZ_AOUT01000186.1	38	NZ_AOUT01000186.1_38	WE_007_TA_transposase	0.858	567	80	0	1	567	1	567	0.000E+00	1009
NZ_AOUX01000120.1	6	NZ_AOUX01000120.1_6	WE_007_TA_transposase	0.266	566	397	0	21	586	16	557	1.408E-62	210
NZ_AOUX01000192.1	37	NZ_AOUX01000192.1_37	WE_007_TA_transposase	0.249	473	351	0	9	481	6	473	2.015E-44	156
NZ_AOUX01000193.1	21	NZ_AOUX01000193.1_21	WE_007_TA_transposase	0.274	557	401	0	9	562	6	562	1.090E-65	218
NZ_AOWO01000051.1	18	NZ_AOWO01000051.1_18	WE_007_TA_transposase	0.266	566	397	0	21	586	16	557	1.943E-62	209
NZ_AOWO01000117.1	73	NZ_AOWO01000117.1_73	WE_007_TA_transposase	0.296	556	389	0	2	554	4	559	1.221E-75	245
NZ_AOWO01000130.1	33	NZ_AOWO01000130.1_33	WE_007_TA_transposase	0.875	567	71	0	1	567	1	567	0.000E+00	1031
NZ_AOWO01000191.1	152	NZ_AOWO01000191.1_152	WE_007_TA_transposase	0.290	563	392	0	4	566	6	558	1.020E-73	240
NZ_AOWP01000036.1	43	NZ_AOWP01000036.1_43	WE_007_TA_transposase	0.266	566	397	0	21	586	16	557	1.943E-62	209
NZ_AOWP01000087.1	28	NZ_AOWP01000087.1_28	WE_007_TA_transposase	0.291	563	391	0	4	566	6	558	1.949E-74	242
NZ_AOWQ01000060.1	34	NZ_AOWQ01000060.1_34	WE_007_TA_transposase	0.289	563	392	0	4	566	6	558	1.420E-73	240
NZ_AOWQ01000119.1	42	NZ_AOWQ01000119.1_42	WE_007_TA_transposase	0.266	566	397	0	21	586	16	557	1.943E-62	209
NZ_AOWZ01000055.1	96	NZ_AOWZ01000055.1_96	WE_007_TA_transposase	0.268	566	396	0	21	586	16	557	1.069E-63	213
NZ_AOXA01000160.1	43	NZ_AOXA01000160.1_43	WE_007_TA_transposase	0.268	566	396	0	21	586	16	557	1.069E-63	213
NZ_AOXB01000013.1	29	NZ_AOXB01000013.1_29	WE_007_TA_transposase	0.281	565	398	0	2	566	4	558	5.386E-70	230
NZ_AOXB01000077.1	89	NZ_AOXB01000077.1_89	WE_007_TA_transposase	0.297	474	328	0	9	482	6	473	1.983E-63	211
NZ_AOXB01000111.1	113	NZ_AOXB01000111.1_113	WE_007_TA_transposase	0.290	556	392	0	2	554	4	559	4.755E-73	238
NZ_APGN01000106.1	4	NZ_APGN01000106.1_4	WE_007_TA_transposase	0.281	565	398	0	2	566	4	558	5.386E-70	230
NZ_APGN01000235.1	15	NZ_APGN01000235.1_15	WE_007_TA_transposase	0.828	566	97	0	1	566	1	566	0.000E+00	966
NZ_CP006694.1	534	NZ_CP006694.1_534	WE_007_TA_transposase	0.828	566	97	0	1	566	1	566	0.000E+00	966
NZ_CP006694.1	2214	NZ_CP006694.1_2214	WE_007_TA_transposase	0.281	565	398	0	2	566	4	558	7.481E-70	229
NZ_CP006694.1	2430	NZ_CP006694.1_2430	WE_007_TA_transposase	0.837	319	52	0	1	319	249	567	2.756E-197	553
NZ_CP011410.1	1594	NZ_CP011410.1_1594	WE_007_TA_transposase	0.268	566	396	0	21	586	16	557	1.069E-63	213
NZ_CP022887.1	355	NZ_CP022887.1_355	WE_007_TA_transposase	0.279	565	399	0	2	566	4	558	5.359E-69	227
NZ_CP027843.1	345	NZ_CP027843.1_345	WE_007_TA_transposase	0.814	566	105	0	1	566	1	566	0.000E+00	948
NZ_CP027843.1	1356	NZ_CP027843.1_1356	WE_007_TA_transposase	0.266	585	406	0	4	588	6	559	4.214E-65	217
NZ_CP028370.1	34	NZ_CP028370.1_34	WE_007_TA_transposase	0.278	565	400	0	2	566	4	558	1.988E-68	226
NZ_CP030142.1	1753	NZ_CP030142.1_1753	WE_007_TA_transposase	0.257	585	411	0	4	588	6	559	1.735E-60	204
NZ_CP030144.1	1861	NZ_CP030144.1_1861	WE_007_TA_transposase	0.867	567	75	0	1	567	1	567	0.000E+00	1020
NZ_CP040840.1	267	NZ_CP040840.1_267	WE_007_TA_transposase	0.968	567	18	0	1	567	1	567	0.000E+00	1157
NZ_CP040840.1	1779	NZ_CP040840.1_1779	WE_007_TA_transposase	0.295	556	388	0	2	553	4	559	1.663E-75	245
NZ_CP040840.1	2744	NZ_CP040840.1_2744	WE_007_TA_transposase	0.268	568	397	0	21	588	16	559	1.476E-63	213
NZ_CP040841.1	98	NZ_CP040841.1_98	WE_007_TA_transposase	0.968	567	18	0	1	567	1	567	0.000E+00	1157
NZ_CP040843.1	269	NZ_CP040843.1_269	WE_007_TA_transposase	0.968	567	18	0	1	567	1	567	0.000E+00	1157
NZ_CP040843.1	1343	NZ_CP040843.1_1343	WE_007_TA_transposase	0.268	568	397	0	21	588	16	559	1.476E-63	213
NZ_CP040843.1	2304	NZ_CP040843.1_2304	WE_007_TA_transposase	0.295	556	388	0	2	553	4	559	1.663E-75	245
NZ_CP043876.1	846	NZ_CP043876.1_846	WE_007_TA_transposase	0.296	556	389	0	2	554	4	559	1.221E-75	245
NZ_CP043877.1	216	NZ_CP043877.1_216	WE_007_TA_transposase	0.266	566	397	0	21	586	16	557	1.408E-62	210
NZ_CP043880.1	54	NZ_CP043880.1_54	WE_007_TA_transposase	0.297	556	387	0	2	553	4	559	4.403E-76	246
NZ_CP043880.1	1602	NZ_CP043880.1_1602	WE_007_TA_transposase	0.297	556	387	0	2	553	4	559	4.403E-76	246
NZ_CP043884.1	2189	NZ_CP043884.1_2189	WE_007_TA_transposase	0.267	566	397	0	21	586	16	557	3.883E-63	211
NZ_CP043884.1	2656	NZ_CP043884.1_2656	WE_007_TA_transposase	0.287	563	394	0	4	566	6	558	2.776E-72	236
NZ_CP043884.1	2808	NZ_CP043884.1_2808	WE_007_TA_transposase	0.267	566	397	0	21	586	16	557	3.883E-63	211
NZ_CP043893.1	385	NZ_CP043893.1_385	WE_007_TA_transposase	0.293	330	221	0	21	350	16	329	4.352E-42	145
NZ_CP043893.1	2984	NZ_CP043893.1_2984	WE_007_TA_transposase	0.287	563	394	0	4	566	6	558	1.435E-72	237
NZ_JACADP010000001.1	450	NZ_JACADP010000001.1_450	WE_007_TA_transposase	0.871	567	73	0	1	567	1	567	0.000E+00	1026
NZ_JADDWU010000015.1	45	NZ_JADDWU010000015.1_45	WE_007_TA_transposase	0.872	567	72	0	1	567	1	567	0.000E+00	1028
NZ_JADDWV010000084.1	20	NZ_JADDWV010000084.1_20	WE_007_TA_transposase	0.872	567	72	0	1	567	1	567	0.000E+00	1028
NZ_JADDXJ010000015.1	21	NZ_JADDXJ010000015.1_21	WE_007_TA_transposase	0.872	567	72	0	1	567	1	567	0.000E+00	1028
NZ_JAFFPR010000010.1	29	NZ_JAFFPR010000010.1_29	WE_007_TA_transposase	0.256	605	416	0	2	606	4	563	3.285E-62	209
NZ_JAFFPU010000015.1	1	NZ_JAFFPU010000015.1_1	WE_007_TA_transposase	0.328	406	269	0	17	418	154	559	9.413E-65	211
NZ_JAGX01000002.1	190	NZ_JAGX01000002.1_190	WE_007_TA_transposase	0.269	596	410	0	4	599	6	567	4.577E-68	225
NZ_JH597773.1	3679	NZ_JH597773.1_3679	WE_007_TA_transposase	0.330	564	371	0	7	570	6	559	1.110E-93	295
NZ_JPUB01000004.1	68	NZ_JPUB01000004.1_68	WE_007_TA_transposase	0.876	567	70	0	1	567	1	567	0.000E+00	1033
NZ_JPUB01000232.1	19	NZ_JPUB01000232.1_19	WE_007_TA_transposase	0.289	563	392	0	4	566	6	558	1.420E-73	240
NZ_JPUB01000329.1	8	NZ_JPUB01000329.1_8	WE_007_TA_transposase	0.249	473	351	0	9	481	6	473	1.096E-44	157
NZ_JQDG01000029.1	9	NZ_JQDG01000029.1_9	WE_007_TA_transposase	0.330	564	371	0	7	570	6	559	1.110E-93	295
NZ_JQGU01000010.1	19	NZ_JQGU01000010.1_19	WE_007_TA_transposase	0.918	567	46	0	1	567	1	567	0.000E+00	1090
NZ_JQGV01000100.1	16	NZ_JQGV01000100.1_16	WE_007_TA_transposase	0.920	567	45	0	1	567	1	567	0.000E+00	1093
NZ_JQOL01000028.1	17	NZ_JQOL01000028.1_17	WE_007_TA_transposase	0.287	563	394	0	4	566	6	558	1.435E-72	237
NZ_JQOL01000080.1	23	NZ_JQOL01000080.1_23	WE_007_TA_transposase	0.271	566	394	0	21	586	16	557	4.214E-65	217
NZ_JQOM01000030.1	59	NZ_JQOM01000030.1_59	WE_007_TA_transposase	0.877	567	70	0	1	567	1	567	0.000E+00	1034
NZ_JQOM01000032.1	31	NZ_JQOM01000032.1_31	WE_007_TA_transposase	0.289	563	392	0	4	566	6	558	2.750E-73	239
NZ_JQOQ01000017.1	53	NZ_JQOQ01000017.1_53	WE_007_TA_transposase	0.297	556	387	0	2	553	4	559	2.265E-76	247
NZ_JQOQ01000115.1	26	NZ_JQOQ01000115.1_26	WE_007_TA_transposase	0.267	566	397	0	21	586	16	557	2.813E-63	212
NZ_JQOR01000149.1	1	NZ_JQOR01000149.1_1	WE_007_TA_transposase	0.848	161	24	0	1	161	407	567	9.369E-97	285
NZ_JQOR01000195.1	1	NZ_JQOR01000195.1_1	WE_007_TA_transposase	0.920	199	16	0	1	199	153	351	1.491E-134	385
NZ_JQOT01000013.1	69	NZ_JQOT01000013.1_69	WE_007_TA_transposase	0.287	563	394	0	4	566	6	558	1.435E-72	237
NZ_JQOZ01000096.1	19	NZ_JQOZ01000096.1_19	WE_007_TA_transposase	0.876	567	70	0	1	567	1	567	0.000E+00	1033
NZ_JQPA01000001.1	15	NZ_JQPA01000001.1_15	WE_007_TA_transposase	0.297	556	387	0	2	553	4	559	4.403E-76	246
NZ_JQPA01000161.1	34	NZ_JQPA01000161.1_34	WE_007_TA_transposase	0.287	563	394	0	4	566	6	558	1.435E-72	237
NZ_JQPC01000050.1	9	NZ_JQPC01000050.1_9	WE_007_TA_transposase	0.250	473	350	0	9	481	6	473	8.086E-45	158
NZ_JQPC01000056.1	82	NZ_JQPC01000056.1_82	WE_007_TA_transposase	0.877	567	70	0	1	567	1	567	0.000E+00	1034
NZ_JQPD01000096.1	7	NZ_JQPD01000096.1_7	WE_007_TA_transposase	0.266	566	397	0	21	586	16	557	1.943E-62	209
NZ_JQPF01000017.1	31	NZ_JQPF01000017.1_31	WE_007_TA_transposase	0.297	556	387	0	2	553	4	559	4.403E-76	246
NZ_JQPF01000044.1	35	NZ_JQPF01000044.1_35	WE_007_TA_transposase	0.268	566	396	0	21	586	16	557	1.069E-63	213
NZ_JQPH01000026.1	45	NZ_JQPH01000026.1_45	WE_007_TA_transposase	0.297	556	387	0	2	553	4	559	4.403E-76	246
NZ_JQPH01000151.1	12	NZ_JQPH01000151.1_12	WE_007_TA_transposase	0.266	566	397	0	21	586	16	557	1.408E-62	210
NZ_JQPI01000027.1	16	NZ_JQPI01000027.1_16	WE_007_TA_transposase	0.266	566	397	0	21	586	16	557	1.408E-62	210
NZ_JQPJ01000041.1	25	NZ_JQPJ01000041.1_25	WE_007_TA_transposase	0.271	566	394	0	21	586	16	557	4.214E-65	217
NZ_JQPN01000019.1	46	NZ_JQPN01000019.1_46	WE_007_TA_transposase	0.287	563	394	0	4	566	6	558	1.435E-72	237
NZ_JQPO01000179.1	15	NZ_JQPO01000179.1_15	WE_007_TA_transposase	0.297	556	388	0	14	566	4	559	2.208E-76	248
NZ_JQPP01000014.1	44	NZ_JQPP01000014.1_44	WE_007_TA_transposase	0.286	563	394	0	4	566	6	558	3.861E-72	236
NZ_JQPS01000037.1	56	NZ_JQPS01000037.1_56	WE_007_TA_transposase	0.266	566	397	0	21	586	16	557	1.408E-62	210
NZ_JQPU01000093.1	44	NZ_JQPU01000093.1_44	WE_007_TA_transposase	0.266	566	397	0	21	586	16	557	1.408E-62	210
NZ_JQPV01000335.1	2	NZ_JQPV01000335.1_2	WE_007_TA_transposase	0.848	161	24	0	1	161	407	567	9.369E-97	285
NZ_JQPV01000364.1	1	NZ_JQPV01000364.1_1	WE_007_TA_transposase	0.920	199	16	0	1	199	153	351	1.491E-134	385
NZ_JQPW01000004.1	59	NZ_JQPW01000004.1_59	WE_007_TA_transposase	0.877	567	70	0	1	567	1	567	0.000E+00	1034
NZ_JQPW01000044.1	36	NZ_JQPW01000044.1_36	WE_007_TA_transposase	0.289	563	392	0	4	566	6	558	2.750E-73	239
NZ_JQPX01000064.1	62	NZ_JQPX01000064.1_62	WE_007_TA_transposase	0.296	556	389	0	14	566	4	559	8.326E-76	246
NZ_JQPX01000089.1	7	NZ_JQPX01000089.1_7	WE_007_TA_transposase	0.285	565	395	0	4	568	6	558	5.613E-72	235
NZ_JQPY01000016.1	45	NZ_JQPY01000016.1_45	WE_007_TA_transposase	0.266	566	397	0	21	586	16	557	1.408E-62	210
NZ_JQQA01000035.1	17	NZ_JQQA01000035.1_17	WE_007_TA_transposase	0.267	579	404	0	21	599	16	567	8.052E-65	216
NZ_JQQA01000061.1	45	NZ_JQQA01000061.1_45	WE_007_TA_transposase	0.295	556	388	0	2	553	4	559	1.663E-75	245
NZ_JQQB01000014.1	7	NZ_JQQB01000014.1_7	WE_007_TA_transposase	0.269	568	397	0	21	588	16	559	2.936E-64	214
NZ_JQQB01000058.1	8	NZ_JQQB01000058.1_8	WE_007_TA_transposase	0.290	563	392	0	4	566	6	558	5.262E-74	241
NZ_JQQB01000102.1	16	NZ_JQQB01000102.1_16	WE_007_TA_transposase	0.860	565	79	0	1	565	1	565	0.000E+00	1007
NZ_JQQB01000185.1	2	NZ_JQQB01000185.1_2	WE_007_TA_transposase	0.307	457	313	0	5	456	103	559	1.309E-65	215
NZ_JQQD01000006.1	51	NZ_JQQD01000006.1_51	WE_007_TA_transposase	0.266	566	397	0	21	586	16	557	1.408E-62	210
NZ_JQQE01000032.1	51	NZ_JQQE01000032.1_51	WE_007_TA_transposase	0.267	566	397	0	21	586	16	557	2.813E-63	212
NZ_JQQF01000089.1	16	NZ_JQQF01000089.1_16	WE_007_TA_transposase	0.877	567	70	0	1	567	1	567	0.000E+00	1034
NZ_JQQI01000096.1	51	NZ_JQQI01000096.1_51	WE_007_TA_transposase	0.297	556	387	0	2	553	4	559	2.265E-76	247
NZ_JQQI01000155.1	4	NZ_JQQI01000155.1_4	WE_007_TA_transposase	0.249	473	351	0	9	481	6	473	1.096E-44	157
NZ_JQQJ01000031.1	74	NZ_JQQJ01000031.1_74	WE_007_TA_transposase	0.266	566	397	0	21	586	16	557	1.408E-62	210
NZ_JQQK01000083.1	62	NZ_JQQK01000083.1_62	WE_007_TA_transposase	0.297	556	387	0	2	553	4	559	4.403E-76	246
NZ_JQQL01000084.1	22	NZ_JQQL01000084.1_22	WE_007_TA_transposase	0.903	567	55	0	1	567	1	567	0.000E+00	1069
NZ_JQQL01000461.1	1	NZ_JQQL01000461.1_1	WE_007_TA_transposase	0.310	267	180	0	3	264	35	301	1.797E-37	129
NZ_JQQP01000006.1	24	NZ_JQQP01000006.1_24	WE_007_TA_transposase	0.266	566	397	0	21	586	16	557	1.943E-62	209
NZ_JQQT01000124.1	37	NZ_JQQT01000124.1_37	WE_007_TA_transposase	0.287	563	394	0	4	566	6	558	1.435E-72	237
NZ_JQQW01000007.1	50	NZ_JQQW01000007.1_50	WE_007_TA_transposase	0.877	567	70	0	1	567	1	567	0.000E+00	1034
NZ_JQQW01000106.1	25	NZ_JQQW01000106.1_25	WE_007_TA_transposase	0.268	566	396	0	21	586	16	557	1.476E-63	213
NZ_JQQW01000169.1	25	NZ_JQQW01000169.1_25	WE_007_TA_transposase	0.250	473	350	0	9	481	6	473	8.086E-45	158
NZ_JQRB01000010.1	43	NZ_JQRB01000010.1_43	WE_007_TA_transposase	0.273	568	395	0	21	588	16	559	2.274E-66	220
NZ_JQRB01000112.1	14	NZ_JQRB01000112.1_14	WE_007_TA_transposase	0.292	556	391	0	2	554	4	559	6.531E-74	241
NZ_JQRC01000006.1	47	NZ_JQRC01000006.1_47	WE_007_TA_transposase	0.263	585	408	0	4	588	6	559	2.038E-63	212
NZ_JQRE01000114.1	35	NZ_JQRE01000114.1_35	WE_007_TA_transposase	0.279	565	399	0	2	566	4	558	1.032E-68	226
NZ_JQRF01000109.1	27	NZ_JQRF01000109.1_27	WE_007_TA_transposase	0.296	556	389	0	2	554	4	559	6.286E-76	246
NZ_JQRG01000021.1	45	NZ_JQRG01000021.1_45	WE_007_TA_transposase	0.290	556	392	0	2	554	4	559	4.755E-73	238
NZ_JQRG01000032.1	27	NZ_JQRG01000032.1_27	WE_007_TA_transposase	0.281	565	398	0	2	566	4	558	5.386E-70	230
NZ_JQRG01000040.1	16	NZ_JQRG01000040.1_16	WE_007_TA_transposase	0.297	474	328	0	9	482	6	473	1.983E-63	211
NZ_JQRH01000026.1	69	NZ_JQRH01000026.1_69	WE_007_TA_transposase	0.281	565	398	0	2	566	4	558	5.386E-70	230
NZ_JQRH01000043.1	16	NZ_JQRH01000043.1_16	WE_007_TA_transposase	0.297	474	328	0	9	482	6	473	1.434E-63	212
NZ_JQRI01000010.1	42	NZ_JQRI01000010.1_42	WE_007_TA_transposase	0.302	465	320	0	124	588	101	559	7.739E-64	213
NZ_JQRK01000035.1	20	NZ_JQRK01000035.1_20	WE_007_TA_transposase	0.826	566	98	0	1	566	1	566	0.000E+00	964
NZ_JQRK01000083.1	7	NZ_JQRK01000083.1_7	WE_007_TA_transposase	0.237	559	423	0	9	563	6	564	1.126E-48	169
NZ_JQRL01000021.1	33	NZ_JQRL01000021.1_33	WE_007_TA_transposase	0.281	565	398	0	2	566	4	558	5.386E-70	230
NZ_JQRM01000002.1	45	NZ_JQRM01000002.1_45	WE_007_TA_transposase	0.290	556	392	0	2	554	4	559	4.755E-73	238
NZ_JQRM01000013.1	88	NZ_JQRM01000013.1_88	WE_007_TA_transposase	0.297	474	328	0	9	482	6	473	1.983E-63	211
NZ_JQRM01000039.1	4	NZ_JQRM01000039.1_4	WE_007_TA_transposase	0.281	565	398	0	2	566	4	558	5.386E-70	230
NZ_JQRN01000066.1	8	NZ_JQRN01000066.1_8	WE_007_TA_transposase	0.940	567	34	0	1	567	1	567	0.000E+00	1119
NZ_JQRN01000093.1	11	NZ_JQRN01000093.1_11	WE_007_TA_transposase	0.271	568	396	0	21	588	16	559	4.214E-65	217
NZ_JQRP01000036.1	17	NZ_JQRP01000036.1_17	WE_007_TA_transposase	0.267	579	404	0	21	599	16	567	8.052E-65	216
NZ_JQRP01000220.1	1	NZ_JQRP01000220.1_1	WE_007_TA_transposase	0.309	406	277	0	9	410	154	559	2.044E-58	194
NZ_JQRQ01000020.1	1	NZ_JQRQ01000020.1_1	WE_007_TA_transposase	0.267	286	203	0	15	300	282	559	4.178E-30	109
NZ_JQRR01000114.1	1	NZ_JQRR01000114.1_1	WE_007_TA_transposase	0.356	250	158	0	2	251	201	446	5.180E-44	148
NZ_JQRT01000027.1	43	NZ_JQRT01000027.1_43	WE_007_TA_transposase	0.262	585	408	0	4	588	6	559	3.883E-63	211
NZ_JQRU01000013.1	10	NZ_JQRU01000013.1_10	WE_007_TA_transposase	0.262	585	408	0	4	588	6	559	3.883E-63	211
NZ_JQSB01000008.1	18	NZ_JQSB01000008.1_18	WE_007_TA_transposase	0.270	568	396	0	21	588	16	559	1.113E-64	216
NZ_LCZF01000124.1	88	NZ_LCZF01000124.1_88	WE_007_TA_transposase	0.268	566	396	0	21	586	16	557	1.069E-63	213
NZ_LHQT01000048.1	48	NZ_LHQT01000048.1_48	WE_007_TA_transposase	0.282	565	398	0	2	566	4	558	3.878E-70	230
NZ_LMXF01000003.1	43	NZ_LMXF01000003.1_43	WE_007_TA_transposase	0.268	566	396	0	21	586	16	557	1.069E-63	213
NZ_LMXK01000001.1	54	NZ_LMXK01000001.1_54	WE_007_TA_transposase	0.268	566	396	0	21	586	16	557	1.069E-63	213
NZ_LSSR01000011.1	235	NZ_LSSR01000011.1_235	WE_007_TA_transposase	0.281	565	398	0	2	566	4	558	5.386E-70	230
NZ_LSSR01000030.1	16	NZ_LSSR01000030.1_16	WE_007_TA_transposase	0.826	566	98	0	1	566	1	566	0.000E+00	964
NZ_LSSR01000032.1	16	NZ_LSSR01000032.1_16	WE_007_TA_transposase	0.824	566	99	0	1	566	1	566	0.000E+00	962
NZ_LSSR01000091.1	1	NZ_LSSR01000091.1_1	WE_007_TA_transposase	0.759	97	23	0	1	97	430	526	1.775E-48	152
NZ_LUVO01000100.1	14	NZ_LUVO01000100.1_14	WE_007_TA_transposase	0.298	522	363	0	2	519	38	559	1.545E-71	233
NZ_MSFX01000004.1	126	NZ_MSFX01000004.1_126	WE_007_TA_transposase	0.294	556	389	0	2	553	4	559	4.500E-75	244
NZ_MSFX01000057.1	17	NZ_MSFX01000057.1_17	WE_007_TA_transposase	0.267	579	404	0	21	599	16	567	8.052E-65	216
NZ_MTAS01000024.1	94	NZ_MTAS01000024.1_94	WE_007_TA_transposase	0.268	583	403	0	4	586	6	557	1.153E-65	218
NZ_MTSU01000002.1	341	NZ_MTSU01000002.1_341	WE_007_TA_transposase	0.278	565	400	0	2	566	4	558	1.988E-68	226
NZ_MVAF01000008.1	54	NZ_MVAF01000008.1_54	WE_007_TA_transposase	0.252	473	349	0	9	481	6	473	1.311E-45	160
NZ_MVAF01000012.1	17	NZ_MVAF01000012.1_17	WE_007_TA_transposase	0.903	567	55	0	1	567	1	567	0.000E+00	1069
NZ_MVAF01000012.1	62	NZ_MVAF01000012.1_62	WE_007_TA_transposase	0.266	566	397	0	21	586	16	557	1.408E-62	210
NZ_MVIT01000072.1	100	NZ_MVIT01000072.1_100	WE_007_TA_transposase	0.278	565	400	0	2	566	4	558	2.758E-68	225
NZ_NKYG01000003.1	86	NZ_NKYG01000003.1_86	WE_007_TA_transposase	0.289	563	392	0	4	566	6	558	2.750E-73	239
NZ_NKYG01000043.1	4	NZ_NKYG01000043.1_4	WE_007_TA_transposase	0.875	567	71	0	1	567	1	567	0.000E+00	1032
NZ_NKYH02000025.1	7	NZ_NKYH02000025.1_7	WE_007_TA_transposase	0.266	566	397	0	21	586	16	557	1.408E-62	210
NZ_NPDQ01000015.1	20	NZ_NPDQ01000015.1_20	WE_007_TA_transposase	0.258	587	404	0	11	597	19	563	1.937E-61	207
NZ_NPEF01000122.1	17	NZ_NPEF01000122.1_17	WE_007_TA_transposase	0.848	566	86	0	1	566	1	566	0.000E+00	994
NZ_NPEH01000131.1	10	NZ_NPEH01000131.1_10	WE_007_TA_transposase	0.848	566	86	0	1	566	1	566	0.000E+00	994
NZ_QHCT01000003.1	353	NZ_QHCT01000003.1_353	WE_007_TA_transposase	0.300	556	386	0	2	553	4	559	1.133E-77	251
NZ_RQEQ01000015.1	38	NZ_RQEQ01000015.1_38	WE_007_TA_transposase	0.863	567	78	0	1	567	1	567	0.000E+00	1015
NZ_RQFE01000031.1	155	NZ_RQFE01000031.1_155	WE_007_TA_transposase	0.265	605	411	0	2	606	4	563	4.058E-67	223
NZ_RQFF01000037.1	497	NZ_RQFF01000037.1_497	WE_007_TA_transposase	0.265	605	411	0	2	606	4	563	4.058E-67	223
NZ_RQFG01000005.1	497	NZ_RQFG01000005.1_497	WE_007_TA_transposase	0.265	605	411	0	2	606	4	563	4.058E-67	223
NZ_RQFT01000008.1	83	NZ_RQFT01000008.1_83	WE_007_TA_transposase	0.313	560	384	0	3	562	4	563	1.220E-84	270
NZ_RQGT01000121.1	15	NZ_RQGT01000121.1_15	WE_007_TA_transposase	0.863	567	78	0	1	567	1	567	0.000E+00	1015
NZ_RQHP01000013.1	237	NZ_RQHP01000013.1_237	WE_007_TA_transposase	0.266	596	412	0	4	599	6	567	2.274E-66	220
NZ_VCHL01000011.1	41	NZ_VCHL01000011.1_41	WE_007_TA_transposase	0.278	565	400	0	2	566	4	558	1.432E-68	226
NZ_WUMI01000016.1	6	NZ_WUMI01000016.1_6	WE_007_TA_transposase	0.296	556	388	0	2	553	4	559	6.138E-76	246

## Sheet: S2
Prophages extracted from the 236 Leptospiraceae contigs > 35 Kb
Columns are organized in different sections by distinct colors. The last column highlights the strains with more than one prophage.
Leptospiral contigs information					Information about the extracted prophages												GC %		Sampling information for cultured leptospira								prophages_on_same_host_strain
strain	Contig_length	Locus	Species_Name	category	name	left end	right end	length	family	Sub-family	genus	species	strain	Ref_Genus	Ref_Species	Ref_strain	in prophage	in contig	Ecosystem	Phylum	Class	Order	Continent	Region	Coordinates	year
Leptospira borgpetersenii serovar Balcanica strain SN_Ce_RL16	51564	NZ_JADDWU010000015.1	borgpetersenii	P1-virulent	BONN154	2653	41272	38620	cold	TA	5	5	1	0	1	1	42,1361988606939	NA	Cervus elaphus	Chordata	Mammalia	Artiodactyla	Oceania	New Zealand		2017
Leptospira interrogans str. 2002000624 ctg7180000004006	108114	NZ_AFJK02000010.1	interrogans	P1-virulent	INTA113	69989	107929	37941	cold	TA	15	33	2	0	1	1	41,8122874990116	33,8848274977555	Homo sapiens	Chordata	Mammalia	Primates	North_America	HawaiI			18
Leptospira mayottensis strain MDI222 chromosome I.	3934431	NZ_CP030144.1	mayottensis	P1-virulent	MANN68	2105710	2144752	39043	cold	TA	21	75	3	1	1	1	42,1227876956177	39,6025402999727	Tenrecidae	Chordata	Mammalia	Afrosoricida	Africa	Mayotte	12.83 S 45.14 E	2014
Leptospira santarosai serovar Shermani str. LT 821 chromosome I, complete sequence.	3659905	NZ_CP006694.1	santarosai	P1-virulent	SATA51	571632	610967	39336	cold	TA	24	104	4	0	1	1	43,2631685987391	41,788597317162	Rattus, kidney	Chordata	Mammalia	Rodentia	South_America	Panama		1987	37
Leptospira santarosai str. 200403458 ctg7180000007638	218922	NZ_AKWI02000042.1	santarosai	P1-virulent	SATA46	113251	153365	40115	cold	TA	24	103	5	0	1	1	43,392745855665	42,2651238486189	Homo sapiens	Chordata	Mammalia	Primates	South_America	Guadeloupe			39
Leptospira alexanderi strain 56640	56049	NZ_JQGV01000100.1	alexanderi	P1-virulent	AXNN157	377	39969	39593	cold	TA	2	2	6	0	1	1	41,8028439370596	NA	Homo sapiens	Chordata	Mammalia	Primates	Asia	China, Yunnan	25.04 N 102.42 E	1962
Leptospira weilii strain CUDO6 chromosome I, complete sequence.	3965053	NZ_CP040840.1	weilii	P1-virulent	WETA1	252159	291226	39068	cold	TA	2	122	7	1	1	1	42,2903655165353	40,9158211251444	Dog, urine	Chordata	Mammalia	Carnivora	Asia	Thailand, Nan province	18.7673 N 100.776 E	2014	53
Leptospira interrogans serovar Grippotyphosa str. 2006006986 ctg7180000004636	428346	NZ_AKXC02000057.1	interrogans	P1-virulent	INTA136	81042	120565	39524	cold	TA	14	35	8	0	0	1	39,8087238133792	35,1129822900968	Homo sapiens	Chordata	Mammalia	Primates	Africa	Egypt			5
Leptospira interrogans strain 56662 Contig030	79106	NZ_JQOM01000030.1	interrogans	P1-virulent	INTA85	10434	49012	38579	cold	TA	14	36	9	0	1	1	39,9621555768682	NA	Microtus fortis	Chordata	Mammalia	Rodentia	Asia	China, Huhan	28.12 N 112.59 E	1980	27
Leptospira interrogans strain 56610 Contig007	90425	NZ_JQQW01000007.1	interrogans	P1-virulent	INTA96	43074	81617	38544	cold	TA	14	38	10	0	1	1	40,1281652137816	35,8609124727742	Homo sapiens	Chordata	Mammalia	Primates	Asia	China, Sichuan	30.40 N 104.04 E	1958	25
Leptospira kanakyensis strain 201800292 contig_0001	1522793	NZ_RQFG01000005.1	kanakyensis	S1	KANN77	532417	571502	39086	cold	TG1	16	65	11	1	1	1	39,5461290487643	38,2423888274437	soil	soil	soil	soil	Oceania	New Caledonia		2017
Leptospira licerasiae str. MMD4847 ctg7180000002435	1443323	NZ_AHOM02000004.1	licerasiae	P2	LINN70	1234243	1273697	39455	cold	TG1	19	73	12	1	1	1	42,7981244455709	40,8076827735941	Chiroptera	Chordata	Mammalia	Chiroptera	South_America	Peru, Iquitos
Leptospira interrogans serovar Pyrogenes str. R168 ctg7180000004848	183474	NZ_AHNH02000077.1	interrogans	P1-virulent	INNN121	132479	170279	37801	cold	TG1	8	11	13	0	0	1	40,723790375916	36,1776032621007	Homo sapiens	Chordata	Mammalia	Primates	Asia	Sri-Lanka			12
Leptospira interrogans str. 2002000623 ctg7180000003953	198338	NZ_AHMG02000056.1	interrogans	P1-virulent	INTG114	156468	194418	37951	cold	TG1	8	47	14	0	1	1	40,9396326842507	35,2777968289201	Homo sapiens	Chordata	Mammalia	Primates	North_America	HawaiI			17
Leptospira interrogans str. UI 08452 ctg7180000006131	480724	NZ_AHNL02000030.1	interrogans	P1-virulent	INTG109	250603	288231	37629	cold	TG1	8	44	15	1	1	1	41,0693879720428	35,1371602026653	Homo sapiens	Chordata	Mammalia	Primates	Asia	Laos
Leptospira interrogans serovar Lai str. Langkawi contig_43	80357	NZ_AHQD01000043.1	interrogans	P1-virulent	INTG129	30448	66960	36513	cold	TG1	8	52	16	0	1	1	40,821077424479	NA	unknown	unknown	unknown	unknown					9
Leptospira interrogans strain 56649 Contig093	77663	NZ_JQPU01000093.1	interrogans	P1-virulent	INTG87	36734	74241	37508	cold	TG1	8	62	17	0	1	1	41,0259144715794	NA	Homo sapiens	Chordata	Mammalia	Primates	Asia	China, Zhejiang	30.16 N 120.10 E	1971
Leptospira interrogans serovar Bratislava strain PigK151 chromosome I	4370471	NZ_CP011410.1	interrogans	P1-virulent	INTG141	2002156	2039738	37583	cold	TG1	8	57	18	0	1	1	40,5582311151318	34,97851779229	Sus scrofa, kidney	Chordata	Mammalia	Artiodactyla	North_America	USA, Iowa		1989
Leptospira weiliii strain CUDO6 chromosome I, complete sequence.	3965053	NZ_CP040840.1	weilii	P1-virulent	WETG3	3065098	3102414	37317	cold	TG1	20	119	19	0	0	1	42,519495136265	40,9142569663542	Dog, urine	Chordata	Mammalia	Carnivora	Asia	Thailand, Nan province	18.7673 N 100.776 E	2014	53
Leptospira borgpetersenii str. 200801926	949856	NZ_AKWJ02000028.1	borgpetersenii	P1-virulent	BONN152	286695	324633	37939	cold	TG1	3	3	20	1	1	1	42,6816732122618	39,0039883015669	Homo sapiens	Chordata	Mammalia	Primates	Africa	Mayotte
Leptospira sp. Fiocruz LV3954 ctg7180000005022	104409	NZ_AKWV02000053.1	unclassified	Other	UNNN25	68328	104409	36082	cold	TG1	23	114	21	0	1	1	43,0879662989856	42,3522180104497	Homo sapiens	Chordata	Mammalia	Primates	South_America	Brazil, Salvador			45
Leptospira kirschneri serovar Bulgarica str. Nikolaevo ctg7180000006278	57060	NZ_ANCE01000096.1	kirschneri	P1-virulent	KINN76	1	36956	36956	hot	TG3	18	69	22	0	1	1	41,3654075116355	NA	Homo sapiens	Chordata	Mammalia	Primates	Europe	Bulgaria
Leptospira noguchii serovar Panama str. CZ214 ctg1134732786322	690650	NZ_AKWY02000034.1	noguchii	P1-virulent	NOTG66	655179	690611	35433	hot	TG3	22	84	23	0	1	1	42,0173284791014	35,2246660266751	Didelphis marsupialis	Chordata	Mammalia	Didelphimorphia	South_America	Panama, canal zone			31
Leptospira santarosai serovar Szwajizak str. Oregon ctg7180000005035	137224	NZ_AOXB01000111.1	santarosai	P1-virulent	SANN49	101366	137224	35859	hot	TG3	22	96	24	0	1	1	42,9571376781282	41,7639224584423	unknown	unknown	unknown	unknown					38
Leptospira weilii serovar Heyan strain L231 Scaffold4_1	146035	NZ_MSFX01000004.1	weilii	P1-virulent	WETG18	99364	136480	37117	hot	TG3	12	126	25	0	1	1	42,6947220949969	40,6094493104905	Homo sapiens	Chordata	Mammalia	Primates	Asia	China, Yunnan	25.04 N 102.42 E	1990
Leptospira weilii strain CUD13 chromosome I, complete sequence.	3978120	NZ_CP040843.1	weilii	P1-virulent	WETG2	2520418	2557253	36836	hot	TG3	12	118	26	0	1	1	42,5860571180367	40,9352383639443	Dog, urine	Chordata	Mammalia	Carnivora	Asia	Thailand, Nan province	18.7673 N 100.776 E	2014	52
Leptospira interrogans serovar Grippotyphosa str. UI 12769 ctg7180000003662	142621	NZ_AHNT02000076.1	interrogans	P1-virulent	INTG130	69291	106175	36885	hot	TG3	12	53	27	0	1	1	41,7053002575573	35,0382083680109	Homo sapiens	Chordata	Mammalia	Primates	Asia	Laos
Leptospira interrogans serovar Lai str. Langkawi contig_45	72867	NZ_AHQD01000045.1	interrogans	P1-virulent	INTG128	7865	44702	36838	hot	TG3	12	51	28	1	1	1	41,4436180031489	NA	unknown	unknown	unknown	unknown					9
Leptonema illini DSM 21528	4325094	NZ_JH597773.1	illini	Other	ILNN158	3907777	3949315	41539	cold	IL	7	7	29	1	1	1	54,7437348034377	54,2283319574363	Bos taurus, urine	Chordata	Mammalia	Artiodactyla	North_America	USA
Leptospira interrogans strain CMCC-1 Contig013	97360	NZ_JQOT01000013.1	interrogans	P1-virulent	INNN83	37958	74954	36997	hot	TG2	11	19	30	0	0	1	38,0138930183528	33,558636913341	Homo sapiens	Chordata	Mammalia	Primates	Asia	China	23.08 N 113.14 E	1960
Leptospira interrogans strain 56662 Contig032	54749	NZ_JQOM01000032.1	interrogans	P1-virulent	INTG84	14199	53023	38825	hot	TG2	11	60	31	0	1	1	37,7591757887959	NA	Microtus fortis	Chordata	Mammalia	Rodentia	Asia	China, Huhan	28.12 N 112.59 E	1980	27
Leptospira interrogans serovar Lai strain SR61 contig232	37222	NZ_JPUB01000232.1	interrogans	P1-virulent	INNN126	1	37222	37222	hot	TG2	11	13	32	0	1	1	37,9318682499597	NA	Homo sapiens, blood	Chordata	Mammalia	Primates	Asia	Sri-Lanka		2008	10
Leptospira interrogans serovar Grippotyphosa str. Andaman ctg7180000004481	236931	NZ_AKXG02000054.1	interrogans	P1-virulent	INTG133	54692	91509	36818	hot	TG2	11	55	33	0	1	1	38,100928893476	34,0712497438947	unknown	unknown	unknown	unknown					6
Leptospira interrogans serovar Pyrogenes str. R168 ctg7180000004863	100117	NZ_AHNH02000088.1	interrogans	P1-virulent	INTG120	31318	68320	37003	hot	TG2	11	50	34	0	1	1	37,9780017836392	35,3439807332763	Homo sapiens	Chordata	Mammalia	Primates	Asia	Sri-Lanka			12
Leptospira noguchii str. Bonito ctg7180000008948	59673	NZ_AOHH01000122.1	noguchii	P1-virulent	NOTG59	466	37199	36734	hot	TG2	11	83	35	0	0	1	38,4983938585507	NA	Homo sapiens	Chordata	Mammalia	Primates	South_America	Brazil, Pelotas
Leptospira santarosai str. 200403458 ctg7180000007638	218922	NZ_AKWI02000042.1	santarosai	P1-virulent	SANN47	86	37739	37654	hot	TG2	11	95	36	0	1	1	38,7342646199607	43,2481188075115	Homo sapiens	Chordata	Mammalia	Primates	South_America	Guadeloupe			39
Leptospira santarosai strain U164 chromosome I.	3730310	NZ_CP028370.1	santarosai	P1-virulent	SANN27	8613	44227	35615	hot	TG2	11	85	37	0	0	1	39,0930787589499	41,8875245387582	Bovine, urine	Chordata	Mammalia	Artiodactyla	South_America	Brazil, Rio	22.54 S 43.12 W
Leptospira santarosai serovar Shermani str. LT 821 chromosome I, complete sequence.	3659905	NZ_CP006694.1	santarosai	P1-virulent	SATG52	2423609	2459960	36352	hot	TG2	11	85	38	0	1	1	39,0652508802817	41,8319257369769	Rattus, kidney	Chordata	Mammalia	Rodentia	South_America	Panama			37
Leptospira interrogans str. UI 12758 ctg7180000005461	311299	NZ_AHNR02000045.1	interrogans	P1-virulent	INNN106	91686	130134	38449	hot	NN	9	9	39	0	1	1	41,9204660719395	34,1000549752611	Homo sapiens	Chordata	Mammalia	Primates	Asia	Laos			23
Leptospira borgpetersenii serovar Kenya str. TE 0159	44623	NZ_AHQT01000210.1	borgpetersenii	P1-virulent	BONN153	3828	40954	37127	hot	NN	4	4	40	1	1	1	44,0353381636006	NA	unknown	unknown	unknown	unknown
Leptospira interrogans serovar Szwajizak str. Szwajizak ctg7180000008564	81636	NZ_AOUT01000186.1	interrogans	P1-virulent	INTA116	38058	76248	38191	cold	TA	15	34	41	1	1	1	41,6197533450289	NA	unknown	unknown	unknown	unknown
Leptospira interrogans str. 2002000624 ctg7180000004009	240930	NZ_AFJK02000025.1	interrogans	P1-virulent	INNN112	101906	141056	39151	hot	NN	10	10	42	1	1	1	42,8035043804756	34,5709910347459	Homo sapiens	Chordata	Mammalia	Primates	North_America	HawaiI			18
Leptospira interrogans serovar Naam str. Naam ctg7180000007681	36768	NZ_AOUX01000193.1	interrogans	P1-virulent	INNN123	1	36435	36435	hot	NN	10	10	43	0	0	1	43,0135858377933	NA	unknown	unknown	unknown	unknown					11
Leptospira interrogans serovar Bulgarica str. Mallika	227577	NZ_AFLS02000008.1	interrogans	P1-virulent	INTG140	137578	174952	37375	cold	TG1	8	56	44	0	1	1	40,7250836120401	35,398155645051	Homo sapiens	Chordata	Mammalia	Primates	Asia	India
Leptospira interrogans strain 56610 Contig106	53224	NZ_JQQW01000106.1	interrogans	P1-virulent	INNN95	10305	47830	37526	cold	TG1	8	11	45	0	1	1	40,6971166657784	NA	Homo sapiens	Chordata	Mammalia	Primates	Asia	China, Sichuan	30.40 N 104.04 E	1958	25
Leptospira noguchii str. 1993005606 ctg7180000020903	51896	NZ_AHMF02000008.1	noguchii	P1-virulent	NONN64	15689	51896	36208	cold	TG1	8	77	46	0	0	1	42,1647149801149	NA	Homo sapiens	Chordata	Mammalia	Primates	North_America	Hawai			32
Leptospira noguchii str. 2007001578 ctg7180000016336	44641	NZ_AHMH02000129.1	noguchii	P1-virulent	NONN60	5112	44095	38984	cold	TG1	8	77	47	0	1	1	42,0634106300021	NA	Homo sapiens	Chordata	Mammalia	Primates	North_America	Hawai			34
Leptospira interrogans serovar Bataviae str. L1111	210066	NZ_AHND02000058.1	interrogans	P1-virulent	INNN148	175889	210066	34178	cold	TG1	8	20	48	0	1	1	41,6144888524782	34,8426271263531	Homo sapiens	Chordata	Mammalia	Primates	Asia	Thailand
Leptospira interrogans str. UI 12621 ctg7180000004653	322379	NZ_AHNQ02000025.1	interrogans	P1-virulent	INTG108	6314	43707	37394	cold	TG1	8	43	49	0	1	1	41,0306466278013	34,9972805586259	Homo sapiens	Chordata	Mammalia	Primates	Asia	Laos
Leptospira interrogans strain 56137 Contig031	94931	NZ_JQQJ01000031.1	interrogans	P1-virulent	INTG98	39975	77692	37718	cold	TG1	8	43	50	0	0	1	41,1103451932764	35,0392393337179	unknown	unknown	unknown	unknown	Asia	Indonesia	6.10 S 106.49 E	1937
Leptospira interrogans str. UI 12758 ctg7180000005457	504173	NZ_AHNR02000028.1	interrogans	P1-virulent	INTG107	153614	189888	36275	cold	TG1	8	42	51	0	1	1	41,0944176430048	35,1542430187776	Homo sapiens	Chordata	Mammalia	Primates	Asia	Laos			23
Leptospira interrogans serovar Grippotyphosa str. UI 12764 ctg7180000005602	196581	NZ_AHNS02000072.1	interrogans	P1-virulent	INTG132	65404	103211	37808	cold	TG1	8	54	52	0	1	1	40,9595852729581	35,7743445044183	Homo sapiens	Chordata	Mammalia	Primates	Asia	Laos			7
Leptospira interrogans str. UI 13372 ctg7180000009854	80599	NZ_AHNV02000054.1	interrogans	P1-virulent	INTG105	211	37701	37491	cold	TG1	8	41	53	0	1	1	41,0818596463151	NA	Homo sapiens	Chordata	Mammalia	Primates	Asia	Laos			24
Leptospira interrogans serovar Bim str. P2529 contig_475	37860	NZ_AHQS01000475.1	interrogans	P1-virulent	INNN142	2	37860	37859	cold	TG1	8	16	54	0	0	1	40,5610290815922	NA	unknown	unknown	unknown	unknown					3
Leptospira interrogans serovar Grippotyphosa str. 2006006986 ctg7180000004653	666736	NZ_AKXC02000051.1	interrogans	P1-virulent	INTG135	21556	58244	36689	cold	TG1	8	16	55	0	1	1	41,1185914034179	35,7405082477974	Homo sapiens	Chordata	Mammalia	Primates	Africa	Egypt			5
Leptospira noguchii str. 2001034031 ctg7180000006988	62196	NZ_AKXB02000004.1	noguchii	P1-virulent	NONN63	1	34629	34629	cold	TG1	8	79	56	0	1	1	42,2507147188772	NA	Homo sapiens	Chordata	Mammalia	Primates	North_America	Hawai			33
Leptospira interrogans serovar Grippotyphosa str. Andaman ctg7180000004438	190950	NZ_AKXG02000002.1	interrogans	P1-virulent	INTG134	109051	145739	36689	cold	TG1	8	16	57	0	0	1	41,1185914034179	35,2201787878984	unknown	unknown	unknown	unknown					6
Leptospira interrogans str. UT126 ctg7180000006008	62874	NZ_ANOJ01000066.1	interrogans	P1-virulent	INTG103	7702	45545	37844	cold	TG1	8	40	58	0	1	1	41,2694218370151	NA	Homo sapiens	Chordata	Mammalia	Primates	Asia	Thailand
Leptospira interrogans serovar Canicola strain 782 chromosome 1	4556406	NZ_CP043884.1	interrogans	P1-virulent	INNN137	2613939	2651187	37249	cold	TG1	8	14	59	0	1	1	40,79572605976	35,205149987044	Homo sapiens	Chordata	Mammalia	Primates	Asia	Malaysia, Klang		2014	4
Leptospira interrogans serovar Canicola strain 782 chromosome 1	4556406	NZ_CP043884.1	interrogans	P1-virulent	INNN138	3309948	3347199	37252	cold	TG1	8	14	60	0	0	1	40,7306990228713	35,2056823024841	Homo sapiens	Chordata	Mammalia	Primates	Asia	Malaysia, Klang		2014	4
Leptospira interrogans serovar Bataviae strain 1489 chromosome 1	4431091	NZ_CP043893.1	interrogans	P1-virulent	INNN146	405169	443470	38302	cold	TG1	8	18	61	0	1	1	40,6140671505404	35,1202391009447	Homo sapiens	Chordata	Mammalia	Primates	Asia	Malaysia, Klang		2014	1
Leptospira interrogans strain H78Shuang4 Contig080	42837	NZ_JQOL01000080.1	interrogans	P1-virulent	INNN80	8095	42837	34743	cold	TG1	8	22	62	0	1	1	40,8744207466252	NA	frog	Chordata	Amphibia	Anura	Asia	China	28.12 N 112.59 E	2005
Leptospira interrogans strain 56626 Contig041	86530	NZ_JQPJ01000041.1	interrogans	P1-virulent	INNN91	8664	46919	38256	cold	TG1	8	27	63	0	1	1	40,3100167294019	NA	Homo sapiens	Chordata	Mammalia	Primates	Asia	China, Guizhou	26.35 N 106.42 E	1970
Leptospira interrogans strain 56642 Contig037	65737	NZ_JQPS01000037.1	interrogans	P1-virulent	INNN88	20598	58003	37406	cold	TG1	8	24	64	0	1	1	40,750147035235	NA	Homo sapiens	Chordata	Mammalia	Primates	Asia	China, Yunnan	25.04 N 102.42 E	1959
Leptospira interrogans strain 56656 Contig016	75784	NZ_JQPY01000016.1	interrogans	P1-virulent	INTG86	35064	72157	37094	cold	TG1	8	61	65	0	1	1	40,9230603332075	NA	Homo sapiens	Chordata	Mammalia	Primates	Asia	China, Hainan	20.02 N 110.20 E	1969
Leptospira interrogans strain 56121 Contig032	77834	NZ_JQQE01000032.1	interrogans	P1-virulent	INNN101	7592	45770	38179	cold	TG1	8	8	66	0	1	1	41,0015977369758	NA	Homo sapiens	Chordata	Mammalia	Primates	Asia	Malaysia	3.08 N 101.42 E	1953
Leptospira noguchii strain 56189 Contig006	57327	NZ_JQRC01000006.1	noguchii	P1-virulent	NONN58	4610	42674	38065	cold	TG1	8	76	67	0	1	1	41,8862472087219	NA	Opossum	Chordata	Mammalia	Didelphimorphia	South_America	Peru	12.02 S 77.01 W	1940
Leptospira weilii str. 2006001855 ctg1127715700081	386742	NZ_AFJM02000028.1	weilii	P1-virulent	WENN14	183215	220240	37026	hot	TG3	12	118	68	0	0	1	42,4242424242424	41,3918722620641	Homo sapiens	Chordata	Mammalia	Primates	Asia	Thailand
Leptospira weilii str. 2006001853 ctg7180000005772	218882	NZ_AFLV02000081.1	weilii	P1-virulent	WENN17	182009	218733	36725	hot	TG3	12	118	69	0	0	1	42,6004084411164	41,7661687445446	Homo sapiens	Chordata	Mammalia	Primates	Asia	Thailand			48
Leptospira interrogans str. FPW2026 ctg7180000004003	250958	NZ_AHMX02000092.1	interrogans	P1-virulent	INTG111	5668	42331	36664	hot	TG3	12	46	70	0	1	1	41,7630373118045	34,9818473685684	Homo sapiens	Chordata	Mammalia	Primates	Asia	Thailand			22
Leptospira interrogans serovar Autumnalis str. LP101	198015	NZ_AHNF02000040.1	interrogans	P1-virulent	INTG149	49699	86140	36442	hot	TG3	12	58	71	0	1	1	41,5921189835904	34,9495274581768	Homo sapiens	Chordata	Mammalia	Primates	Asia	Thailand
Leptospira kirschneri str. 200802841 ctg7180000005377	263389	NZ_AKWH02000041.1	kirschneri	P1-virulent	KITG71	164990	202138	37149	hot	TG3	12	71	72	0	1	1	41,3846940698269	35,8115275813296	Homo sapiens	Chordata	Mammalia	Primates	Africa	Mayotte
Leptospira interrogans serovar Pyrogenes str. Sri Lanka 30 ctg7180000005396	76969	NZ_AOWO01000117.1	interrogans	P1-virulent	INTG119	30419	67005	36587	hot	TG3	12	49	73	0	1	1	41,5393445759423	NA	unknown	unknown	unknown	unknown	Asia	Sri-Lanka			13
Leptospira interrogans serovar Bataviae strain 1548 chromosome	4354848	NZ_CP043880.1	interrogans	P1-virulent	INNN144	12089	49152	37064	hot	TG3	12	17	74	0	1	1	41,5821282106626	35,1333230194007	Homo sapiens	Chordata	Mammalia	Primates	Asia	Malaysia, Klang		2015	2
Leptospira interrogans serovar Bataviae strain 1548 chromosome	4354848	NZ_CP043880.1	interrogans	P1-virulent	INNN145	1907406	1944429	37024	hot	TG3	12	17	75	0	0	1	41,527117545376	35,1338544600243	Homo sapiens	Chordata	Mammalia	Primates	Asia	Malaysia, Klang		2015	2
Leptospira interrogans strain 200040 Contig017	49705	NZ_JQOQ01000017.1	interrogans	P1-virulent	INTG102	6843	43109	36267	hot	TG3	12	39	76	0	1	1	41,5474122480492	NA	Homo sapiens	Chordata	Mammalia	Primates	Asia	China, Sichuan	30.40 N 104.04 E	2000
Leptospira interrogans strain J9 Contig001	53315	NZ_JQPA01000001.1	interrogans	P1-virulent	INTG78	567	37524	36958	hot	TG3	12	59	77	0	1	1	41,7095080902646	NA	Rattus flavipectus	Chordata	Mammalia	Rodentia	Asia	China, Jiangxi	28.40 N 115.55 E	2006	28
Leptospira interrogans strain 56619 Contig017	81838	NZ_JQPF01000017.1	interrogans	P1-virulent	INNN93	22861	59564	36704	hot	TG3	12	29	78	0	1	1	41,4341761115955	NA	Homo sapiens	Chordata	Mammalia	Primates	Asia	China, Yunnan	25.04 N 102.42 E	1960
Leptospira interrogans strain 56624 Contig026	37033	NZ_JQPH01000026.1	interrogans	P1-virulent	INNN92	1	37033	37033	hot	TG3	12	28	79	0	1	1	41,8302594982853	NA	Homo sapiens	Chordata	Mammalia	Primates	Asia	China, Yunnan	25.04 N 102.42 E	1964
Leptospira interrogans strain 56634 Contig179	37053	NZ_JQPO01000179.1	interrogans	P1-virulent	INNN90	7	37053	37047	hot	TG3	12	26	80	0	1	1	41,9953032634221	NA	Homo sapiens	Chordata	Mammalia	Primates	Asia	China, Hainan	20.02 N 110.20 E	1964
Leptospira interrogans strain 56135 Contig096	56622	NZ_JQQI01000096.1	interrogans	P1-virulent	INTG99	12364	49038	36675	hot	TG3	12	64	81	0	1	1	41,5569188820723	NA	Homo sapiens	Chordata	Mammalia	Primates	Asia	Japan	35.41 N 139.46 E	1918
Leptospira interrogans strain 56143 Contig083	87316	NZ_JQQK01000083.1	interrogans	P1-virulent	INTG97	18157	54978	36822	hot	TG3	12	63	82	0	1	1	41,4887838792026	36,2221254010377	Homo sapiens	Chordata	Mammalia	Primates	Asia	Malaysia	3.08 N 101.42 E	1953
Leptospira santarosai str. 2000030832 ctg7180000002496	93723	NZ_AFJN02000022.1	santarosai	P1-virulent	SATG48	24580	61503	36924	hot	TG3	22	109	83	1	1	1	42,7878886361174	42,4803690270784	Homo sapiens	Chordata	Mammalia	Primates	North_America	USA
Leptospira licerasiae strain 201601117 NODE_4_covk_41.5386_covr_82.31_cutoff_42	429756	NZ_RQHP01000013.1	licerasiae	P2	LINN69	221124	260229	39106	cold	TG1	19	72	84	0	1	1	42,4436147905692	41,6106489184692	water	water	water	water	Africa	Mayotte		2016
Leptospira weilii str. 2006001853 ctg7180000005809	108208	NZ_AFLV02000005.1	weilii	P1-virulent	WETG15	7594	44907	37314	cold	TG1	20	119	85	1	1	1	42,7426703114113	42,295539820013	Homo sapiens	Chordata	Mammalia	Primates	Asia	Thailand			48
Leptospira weilii strain 56655 Contig008	53786	NZ_JQSB01000008.1	weilii	P1-virulent	WENN6	2254	39704	37451	cold	TG1	20	119	86	0	0	1	42,5302395129636	NA	Homo sapiens	Chordata	Mammalia	Primates	Asia	China, Guangxi	2.48 N 108.19 E	1970
Leptospira weilii str. UI 13098 ctg7180000005103	37863	NZ_AHNU02000052.1	weilii	P1-virulent	WENN9	1	36695	36695	cold	TG1	20	120	87	0	0	1	42,8641504292138	NA	Homo sapiens	Chordata	Mammalia	Primates	Asia	Laos			50
Leptospira weilii strain 56679 Contig035	36841	NZ_JQQA01000035.1	weilii	P1-virulent	WENN4	916	36841	35926	cold	TG1	20	120	88	0	1	1	42,9911484718588	NA	Homo sapiens	Chordata	Mammalia	Primates	Asia	China, Sichuan	30.40 N 104.04 E	1982	51
Leptospira weilii str. LNT 1194 contig_87	73336	NZ_AHQX01000087.1	weilii	P1-virulent	WENN12	34427	72503	38077	cold	TG1	20	116	89	0	1	1	42,5690049111012	NA	unknown	unknown	unknown	unknown					49
Leptospira sp. P2653 ctg7180000006774	73195	NZ_ANMY01000031.1	unclassified	Other	UNNN23	14700	52694	37995	cold	TG1	20	113	90	0	1	1	42,4345308593236	NA	Echimyidae	Chordata	Mammalia	Rodentia	Asia	China			47
Leptospira mayottensis strain VS2413 chromosome I, complete sequence.	3803942	NZ_CP030142.1	mayottensis	P1-virulent	MANN67	1987788	2024861	37074	cold	TG1	20	74	91	0	1	1	42,8359497221773	39,4822170567166	Tenrecidae	Chordata	Mammalia	Afrosoricida	Africa	Madagascar	18.20 S 47.29 E	2014
Leptospira weilii str. 2006001853 ctg7180000005793	53133	NZ_AFLV02000013.1	weilii	P1-virulent	WETA16	3658	42736	39079	cold	TA	2	122	92	0	0	1	42,1965761662274	NA	Homo sapiens	Chordata	Mammalia	Primates	Asia	Thailand			48
Leptospira weilii str. LNT 1234 ctg7180000005437	118346	NZ_AHNC02000035.1	weilii	P1-virulent	WETA11	29002	68055	39054	cold	TA	2	122	93	0	0	1	42,2952834536795	41,6422842153055	Homo sapiens	Chordata	Mammalia	Primates	Asia	Laos
Leptospira sp. P2653 ctg7180000006828	154132	NZ_ANMY01000092.1	unclassified	Other	UNNN22	1324	40195	38872	cold	TA	2	112	94	0	1	1	42,0534060506277	40,6567759847302	Echimyidae	Chordata	Mammalia	Rodentia	Asia	China			47
Leptospira weilii strain 56105 Contig066	84697	NZ_JQRN01000066.1	weilii	P1-virulent	WENN7	1	35837	35837	cold	TA	2	121	95	0	1	1	42,470072829757	NA	Homo sapiens	Chordata	Mammalia	Primates	Asia	Indonesia	6.10 S 106.49 E	1939
Leptospira noguchii str. 1993005606 ctg7180000020828	191770	NZ_AHMF02000092.1	noguchii	P1-virulent	NONN65	49628	85898	36271	hot	TG2	11	80	96	0	1	1	38,3060847509029	34,8439539804114	Homo sapiens	Chordata	Mammalia	Primates	North_America	Hawai			32
Leptospira noguchii str. 2007001578 ctg7180000016245	140487	NZ_AHMH02000107.1	noguchii	P1-virulent	NONN61	1	35424	35424	hot	TG2	11	78	97	0	1	1	38,0222448057814	34,4973968000152	Homo sapiens	Chordata	Mammalia	Primates	North_America	Hawai			34
Leptospira interrogans str. FPW2026 ctg7180000004010	301342	NZ_AHMX02000036.1	interrogans	P1-virulent	INTG110	145435	182852	37418	hot	TG2	11	45	98	0	1	1	38,2062109145331	35,6185871690335	Homo sapiens	Chordata	Mammalia	Primates	Asia	Thailand			22
Leptospira interrogans serovar Medanensis str. UT053 ctg7180000007071	138681	NZ_AHNW02000115.1	interrogans	P1-virulent	INTG125	15998	53243	37246	hot	TG2	11	15	99	0	1	1	38,4819846426462	33,7772958051954	Homo sapiens	Chordata	Mammalia	Primates	Asia	Thailand
Leptospira interrogans serovar Canicola strain 782 chromosome 1	4556406	NZ_CP043884.1	interrogans	P1-virulent	INNN139	3133846	3172457	38612	hot	TG2	11	15	100	0	0	1	38,4440070444421	35,2235626502669	Homo sapiens	Chordata	Mammalia	Primates	Asia	Malaysia, Klang		2014	4
Leptospira interrogans serovar Pomona str. UT364 ctg7180000008904	50041	NZ_AHNX02000171.1	interrogans	P1-virulent	INNN122	1	34158	34158	hot	TG2	11	12	101	0	1	1	38,1726096375666	NA	Homo sapiens	Chordata	Mammalia	Primates	Asia	Thailand
Leptospira interrogans serovar Bataviae strain 1489 chromosome 1	4431091	NZ_CP043893.1	interrogans	P1-virulent	INNN147	3626884	3663891	37008	hot	TG2	11	19	102	0	0	1	38,1782317336792	35,1423721399892	Homo sapiens	Chordata	Mammalia	Primates	Asia	Malaysia, Klang		2014	1
Leptospira santarosai str. CBC523 ctg7180000003545	134602	NZ_AHOF02000013.1	santarosai	P1-virulent	SANN41	75994	113178	37185	hot	TG2	11	92	103	0	0	1	38,7414279951593	41,7175646961003	Bos primigenius	Chordata	Mammalia	Artiodactyla	South_America	Peru, Iquitos			42
Leptospira santarosai str. HAI1349 ctg7180000005393	308477	NZ_ANNW01000049.1	santarosai	P1-virulent	SATG40	214484	251208	36725	hot	TG2	11	92	104	0	1	1	38,8481960517359	39,6858164797315	Homo sapiens	Chordata	Mammalia	Primates	South_America	Peru, Hospital Apoyo - Iquitos
Leptospira santarosai str. HAI1380 ctg7180000004210	666013	NZ_AHOJ02000032.1	santarosai	P1-virulent	SATG39	245295	282079	36785	hot	TG2	11	108	105	0	1	1	38,9588147342667	41,715562562378	Homo sapiens	Chordata	Mammalia	Primates	South_America	Peru, Hospital Apoyo - Iquitos
Leptospira santarosai str. MOR084 ctg7180000009281	434499	NZ_AHON02000013.1	santarosai	P1-virulent	SANN36	274599	311515	36917	hot	TG2	11	91	106	0	1	1	38,7328331121164	42,6784914810027	Homo sapiens	Chordata	Mammalia	Primates	South_America	Peru, Morona village - Iquitos			44
Leptospira santarosai strain 56274 Contig021	71064	NZ_JQRL01000021.1	santarosai	P1-virulent	SANN32	42	36995	36954	hot	TG2	11	89	107	0	1	1	39,0431347080154	NA	Opossum	Chordata	Mammalia	Didelphimorphia	South_America	Panama, canal zone	9.31 N 79.43 W	1982
Leptospira sp. Fiocruz LV4135 ctg7180000013313	98340	NZ_AOHI01000116.1	unclassified	Other	UNNN24	61699	98340	36642	hot	TG2	11	85	108	0	0	1	39,0535451121664	40,7176893902558	Homo sapiens	Chordata	Mammalia	Primates	South_America	Brazil, Camacar			46
Leptospira santarosai strain M52/8-19 Contig_2	373564	NZ_MTSU01000002.1	santarosai	P1-virulent	SANN29	337737	373351	35615	hot	TG2	11	85	109	0	0	1	39,0930787589499	41,7429848882524	Capybara, kidney	Chordata	Mammalia	Rodentia	South_America	Brazil, Sao Paulo		2008
Leptospira interrogans serovar Pyrogenes str. Sri Lanka 30 ctg7180000005470	199454	NZ_AOWO01000191.1	interrogans	P1-virulent	INTG117	129837	166549	36713	hot	TG2	11	48	110	0	1	1	38,3515376024841	34,313418253544	unknown	unknown	unknown	unknown	Asia	Sri-Lanka			13
Leptospira santarosai strain DU92 chromosome I.	3545388	NZ_CP022887.1	santarosai	P1-virulent	SANN30	336921	375895	38975	hot	TG2	11	87	111	0	1	1	38,6795615731786	41,9564118543435	Dog, urine	Chordata	Mammalia	Carnivora	South_America	Brazil, Sao Paulo	23.53 S 46.62 W	2016
Leptospira interrogans strain 56635 Contig014	80472	NZ_JQPP01000014.1	interrogans	P1-virulent	INNN89	39353	76346	36994	hot	TG2	11	25	112	0	1	1	37,8493809806996	NA	Homo sapiens	Chordata	Mammalia	Primates	Asia	China, Yunnan	25.04 N 102.42 E	1965
Leptospira noguchii strain 56271 Contig114	40296	NZ_JQRE01000114.1	noguchii	P1-virulent	NOTG57	2005	39081	37077	hot	TG2	11	82	113	0	1	1	38,4578040294522	NA	Mongoose	Chordata	Mammalia	Carnivora	South_America	Trinidad and Tobago	10.68 N 61.63 W	1973
Leptospira noguchii strain U73 U73_Contig_48	62041	NZ_LHQT01000048.1	noguchii	P1-virulent	NOTG56	18063	54993	36931	hot	TG2	11	81	114	0	1	1	38,3092794671143	NA	cattle, urine	Chordata	Mammalia	Artiodactyla	South_America	Brazil, Rio		2013
Leptospira santarosai strain C216 C216_2	516162	NZ_LSSR01000011.1	santarosai	P1-virulent	SANN31	247000	283167	36168	hot	TG2	11	88	115	0	1	1	39,1782791417828	41,6457289049446	Homo sapiens, blood	Chordata	Mammalia	Primates	South_America	Ecuador	1.83 S 78.18 W	2014
Leptospira kirschneri serovar Pomona strain M110/06 Contig_5	142726	NZ_MVIT01000072.1	kirschneri	P1-virulent	KINN75	88316	124611	36296	hot	TG2	11	68	116	0	1	1	38,3485783557417	35,6252936202199	fox, urine	Chordata	Mammalia	Carnivora	South_America	Brazil, Mato Grosso do Sul		2006
Leptospira interrogans strain CUDO8 scaffold3size243119	243119	NZ_NKYG01000003.1	interrogans	P1-virulent	INTG81	79878	116626	36749	hot	TG2	11	19	117	0	1	1	38,131649840812	34,3790279594902	Dog, urine	Chordata	Mammalia	Carnivora	Asia	Thailand, Nan province	18.7673 N 100.7761 E	2014
Leptospira interrogans serovar Naam str. Naam ctg7180000007680	124799	NZ_AOUX01000192.1	interrogans	P1-virulent	INNN124	667	38517	37851	hot	NN	9	9	118	0	0	1	41,903780613458	35,5269816442011	unknown	unknown	unknown	unknown					11
Leptospira kirschneri str. 200801774 ctg7180000004406	78580	NZ_AKWL02000040.1	kirschneri	P1-virulent	KINN72	29439	68822	39384	hot	NN	9	66	119	1	1	1	42,6696120251879	NA	Homo sapiens	Chordata	Mammalia	Primates	Africa	Mayotte			30
Leptospira interrogans strain 56610 Contig169	36342	NZ_JQQW01000169.1	interrogans	P1-virulent	INNN94	526	35104	34579	hot	NN	9	30	120	0	1	1	41,5946094450389	NA	Homo sapiens	Chordata	Mammalia	Primates	Asia	China, Sichuan	30.40 N 104.04 E	1958	25
Leptospira interrogans serovar Australis strain SU5	111697	NZ_MVAF01000008.1	interrogans	P1-virulent	INNN150	42513	80748	38236	hot	NN	9	21	121	0	1	1	41,1993932419709	36,1402649024653	swine, urine	Chordata	Mammalia	Artiodactyla	South_America	Brazil, Rio		2013
Leptospira interrogans serovar Grippotyphosa str. UI 12764 ctg7180000005608	48626	NZ_AHNS02000053.1	interrogans	P1-virulent	INTA131	3573	41919	38347	cold	TA	14	37	122	0	1	1	39,9640128302084	NA	Homo sapiens	Chordata	Mammalia	Primates	Asia	Laos			7
Leptospira interrogans serovar Bim str. P2529 contig_297	45195	NZ_AHQS01000297.1	interrogans	P1-virulent	INTA143	1705	40264	38560	cold	TA	14	37	123	0	0	1	39,9714730290456	NA	unknown	unknown	unknown	unknown					3
Leptospira interrogans str. UI 13372 ctg7180000009884	75530	NZ_AHNV02000129.1	interrogans	P1-virulent	INTA104	1828	40487	38660	cold	TA	14	32	124	0	1	1	40,3621314019659	NA	Homo sapiens	Chordata	Mammalia	Primates	Asia	Laos			24
Leptospira interrogans serovar Pyrogenes str. Sri Lanka 30 ctg7180000005409	126438	NZ_AOWO01000130.1	interrogans	P1-virulent	INTA118	20172	58784	38613	cold	TA	14	35	125	1	1	1	40,0953046901303	36,0409906063194	unknown	unknown	unknown	unknown	Asia	Sri-Lanka			13
Leptospira interrogans strain J42 Contig096	51665	NZ_JQOZ01000096.1	interrogans	P1-virulent	INTA79	3231	41969	38739	cold	TA	14	35	126	0	0	1	39,9623118820827	NA	Homo sapiens	Chordata	Mammalia	Primates	Asia	China, Jiangxi	28.40 N 115.55 E	2006
Leptospira interrogans serovar Lai strain SR61 contig004	100443	NZ_JPUB01000004.1	interrogans	P1-virulent	INTA127	22735	61482	38748	cold	TA	14	36	127	0	0	1	39,8807680396408	34,8310235837588	Homo sapiens, blood	Chordata	Mammalia	Primates	Asia	Sri-Lanka		2008	10
Leptospira interrogans strain 56126 Contig089	41367	NZ_JQQF01000089.1	interrogans	P1-virulent	INTA100	555	39379	38825	cold	TA	14	31	128	0	1	1	39,7321313586607	NA	Homo sapiens	Chordata	Mammalia	Primates	Asia	Indonesia	6.10 S 106.49 E	1937
Leptospira weilii str. UI 13098 ctg7180000005093	200515	NZ_AHNU02000034.1	weilii	P1-virulent	WETA10	138551	178326	39776	cold	TA	25	123	129	1	1	1	42,0077433628319	40,4164515145671	Homo sapiens	Chordata	Mammalia	Primates	Asia	Laos			50
Leptospira weilii str. LNT 1194 contig_230	40948	NZ_AHQX01000230.1	weilii	P1-virulent	WENN13	1	35686	35686	cold	TA	25	117	130	0	1	1	42,2462590371574	NA	unknown	unknown	unknown	unknown					49
Leptospira weilii str. UI 13098 ctg7180000005116	180760	NZ_AHNU02000038.1	weilii	P1-virulent	WETA8	9187	49603	40417	cold	TA	2	125	131	0	1	1	41,9971794047059	41,6265862921557	Homo sapiens	Chordata	Mammalia	Primates	Asia	Laos			50
Leptospira santarosai str. CBC379 ctg7180000005370	436345	NZ_AHOE02000008.1	santarosai	P1-virulent	SATA43	130635	169790	39156	cold	TA	24	101	132	0	1	1	43,3241393400756	43,0719380446085	Sus scrofa	Chordata	Mammalia	Artiodactyla	South_America	Peru, Iquitos
Leptospira santarosai str. MOR084 ctg7180000009312	242678	NZ_AHON02000063.1	santarosai	P1-virulent	SATA35	51810	90835	39026	cold	TA	24	99	133	1	1	1	43,4915184748629	41,3209789248326	Homo sapiens	Chordata	Mammalia	Primates	South_America	Peru, Morona village - Iquitos			44
Leptospira santarosai serovar Arenal str. 7 contig_146	81013	NZ_AHQK01000146.1	santarosai	P1-virulent	SATA54	28738	68067	39330	cold	TA	24	105	134	0	1	1	43,3409610983982	NA	unknown	unknown	unknown	unknown					35
Leptospira santarosai serovar Arenal str. 11 contig_96	81785	NZ_AHQL01000096.1	santarosai	P1-virulent	SATA55	3590	42515	38926	cold	TA	24	106	135	0	1	1	43,3540564147357	NA	unknown	unknown	unknown	unknown
Leptospira santarosai str. JET ctg7180000006014	128560	NZ_AKWS02000035.1	santarosai	P1-virulent	SATA37	88714	128210	39497	cold	TA	24	100	136	0	1	1	43,2412588297845	42,5990590930016	Homo sapiens	Chordata	Mammalia	Primates	South_America	Columbia, Medellin			43
Leptospira santarosai str. AIM ctg7180000006146	310259	NZ_AKWT02000051.1	santarosai	P1-virulent	SATA45	250045	289226	39182	cold	TA	24	102	137	0	1	1	43,1269460466541	40,9525706718017	Homo sapiens	Chordata	Mammalia	Primates	South_America	Columbia, Medellin			41
Leptospira santarosai str. CBC1531 ctg7180000004777	38341	NZ_APGN01000235.1	santarosai	P1-virulent	SANN44	1	38341	38341	cold	TA	24	94	138	0	1	1	42,8940298896742	NA	Bubalus sp.	Chordata	Mammalia	Artiodactyla	South_America	Peru, Iquitos
Leptospira santarosai strain 56215 Contig035	91360	NZ_JQRK01000035.1	santarosai	P1-virulent	SATA33	3374	43125	39752	cold	TA	24	98	139	0	1	1	43,4267458241095	42,652301968687	Homo sapiens	Chordata	Mammalia	Primates	South_America	Panama, canal zone	9.31 N 79.43 W	1961
Leptospira santarosai str. CBC523 ctg7180000003539	355480	NZ_AHOF02000021.1	santarosai	P1-virulent	SANN42	46659	87080	40422	cold	TG1	23	93	140	0	1	1	42,3853347187175	42,1185940366536	unknown	unknown	unknown	unknown	South_America	Peru, Iquitos			42
Leptospira santarosai serovar Arenal str. 7 contig_203	38605	NZ_AHQK01000203.1	santarosai	P1-virulent	SANN53	1	35050	35050	cold	TG1	23	97	141	0	1	1	42,2368045649073	NA	unknown	unknown	unknown	unknown					35
Leptospira santarosai str. JET ctg7180000006013	165896	NZ_AKWS02000007.1	santarosai	P1-virulent	SATG38	66113	104528	38416	cold	TG1	23	107	142	1	1	1	42,6176593086214	42,6796360213367	Homo sapiens	Chordata	Mammalia	Primates	South_America	Columbia, Medellin			43
Leptospira santarosai strain U160 chromosome I.	3768600	NZ_CP027843.1	santarosai	P1-virulent	SANN28	1387523	1426717	39195	cold	TG1	23	86	143	0	1	1	42,6956543928143	41,8438057531625	Bovine, urine	Chordata	Mammalia	Artiodactyla	South_America	Brazil, Rio	22.54 S 43.12 W
Leptospira santarosai strain 56180 Contig010	37462	NZ_JQRI01000010.1	santarosai	P1-virulent	SANN34	1	37461	37461	cold	TG1	3	90	144	0	1	1	43,287685859961	NA	Rattus norvegicus	Chordata	Mammalia	Rodentia	South_America	Panama, canal zone	9.31 N 79.42 W	1964
Leptospira kirschneri str. 200801774 ctg7180000004399	182116	NZ_AKWL02000048.1	kirschneri	P1-virulent	KITA73	119308	157661	38354	cold	TA	17	70	145	1	1	1	40,24091359441	35,4627787593383	Homo sapiens	Chordata	Mammalia	Primates	Africa	Mayotte			30
Leptospira kirschneri serovar Ratnapura strain Wumalasena Scaffold_1	490858	NZ_JACADP010000001.1	kirschneri	P1-virulent	KINN74	447736	486713	38978	cold	TA	17	67	146	0	1	1	40,6280465903843	36,1703746810511	Homo sapiens	Chordata	Mammalia	Primates	Asia	India
Leptospira stimsonii strain Yale NODE_3_length_623593_cov_376.779	623593	NZ_QHCT01000003.1	stimsonii	P1-Low-virulent	SINN19	337226	374918	37693	hot	TG3	18	110	148	1	1	1	40,9890430583928	43,7465437788018	freshwater	freshwater	water	freshwater	North_America	USA, Connecticut	41.33033 N 72.90911 W	2016
Leptospira alstonii serovar Sichuan str. 79601	95597	NZ_ANIK01000045.1	alstonii	P1-virulent	ALNN155	445	35393	34949	cold	TG1	1	1	149	0	0	1	42,0927637414518	41,5083762036671	frog	Chordata	Amphibia	Anura	Asia	China
Leptospira alstonii serovar Pingchang str. 80-412	333520	NZ_AOHD02000025.1	alstonii	P1-virulent	ALNN156	1	38012	38012	cold	TG1	1	1	150	1	1	1	41,8288961380617	41,1836566184333	frog	Chordata	Amphibia	Anura	Asia	China
Leptospira weilii strain 56674 Contig102	39031	NZ_JQQB01000102.1	weilii	P1-virulent	WETA5	204	38929	38726	cold	TA	5	124	152	1	1	1	42,1499767597996	NA	Homo sapiens	Chordata	Mammalia	Primates	Asia	China, Sichuan	25.04 N 102.42 E	1981
Leptospira stimsonii strain SSW20 contig_0021	67423	NZ_RQEQ01000015.1	stimsonii	P1-Low-virulent	SINN20	27045	67423	40379	cold	TA	5	111	153	0	1	1	41,7741895539761	NA	freshwater	freshwater	water	freshwater	Asia	Malaysia		2016
Leptospira stimsonii strain 201702407 contig_00031	50798	NZ_RQGT01000121.1	stimsonii	P1-Low-virulent	SINN21	671	39249	38579	cold	TA	5	111	154	0	0	1	42,2069001270121	NA	water	water	water	water	Asia	Malaysia		2016
Leptospira sp. 201903074 contig_0016	88944	NZ_JAFFPR010000010.1	unclassified	Other	UNNN26	16227	55263	39037	cold	TG1	16	115	155	0	1	1	39,4804928657428	NA	water	water	water	water	Africa	Algeria, Abarar river		2019
Leptospira interrogans strain CUDO5 scaffold25.1	61381	NZ_NKYH02000025.1	interrogans	P1-virulent	INNN82	1	43222	43222	cold	TG1	13	23	157	1	1	1	39,9009763546342	NA	Dog, urine	Chordata	Mammalia	Carnivora	Asia	Thailand, Nan province	18.7673 N 100.7761 E	2014
Leptospira bouyouniensis strain 201800273	353379	NZ_RQFT01000008.1	bouyouniensis	S1	BYNN151	69765	107483	37719	hot	TG3	6	6	158	1	1	1	39,2083565311912	37,0512576823164	soil	soil	soil	soil	Oceania	New Caledonia		2017
Leptospira noguchii str. 2001034031 ctg7180000006995	213106	NZ_AKXB02000008.1	noguchii	P1-virulent	NOTG62	101710	138537	36828	hot	TG2	11	83	159	1	1	1	38,511458672749	34,9300536652333	Homo sapiens	Chordata	Mammalia	Primates	North_America	Hawai			33
The 80 prophages that are identical to one of the above 156 prophages (use their strain number to know to which one they are identical to)
Leptospira borgpetersenii serovar Balcanica strain SN_Ce_RL4	51753	NZ_JADDWV010000084.1	borgpetersenii	P1-virulent	BONN235	10293	48912	38620	cold	TA	5	5	1			0	42,1361988606939	NA	Cervus elaphus					New Zealand		2017
Leptospira borgpetersenii serovar Balcanica strain Bal_possum	52208	NZ_JADDXJ010000015.1	borgpetersenii	P1-virulent	BONN236	10620	49239	38620	cold	TA	5	5	1			0	42,1361988606939	NA	Trichosurus vulpecula					New Zealand
Leptospira interrogans str. 2003000735 ctg7180000006006	71616	NZ_ANMX01000162.1	interrogans	P1-virulent	INNN202	1	38052	38052	cold	TA	15	33	2			0	41,7455061494797	NA	Homo sapiens					HawaiI			21
Leptospira interrogans str. 2002000631 ctg7180000006583	71611	NZ_ANMV01000199.1	interrogans	P1-virulent	INNN208	1	38052	38052	cold	TA	15	33	2			0	41,7455061494797	NA	Homo sapiens					HawaiI			19
Leptospira interrogans str. 2003000735 ctg7180000006126	68750	NZ_ANMX01000157.1	interrogans	P1-virulent	INNN199	1	38052	38052	cold	TA	15	33	2			0	41,7770419426049	NA	Homo sapiens					HawaiI			21
Leptospira interrogans str. 2002000631 ctg7180000006582	46679	NZ_ANMV01000156.1	interrogans	P1-virulent	INNN209	1	37897	37897	cold	TA	15	33	2			0	41,8054199540861	NA	Homo sapiens					HawaiI			19
Leptospira interrogans str. 2003000735 ctg7180000006015	46685	NZ_ANMX01000112.1	interrogans	P1-virulent	INNN200	1	37914	37914	cold	TA	15	33	2			0	41,8077754919027	NA	Homo sapiens					HawaiI			21
Leptospira interrogans str. 2002000632 ctg7180000006517	46689	NZ_ANMW01000083.1	interrogans	P1-virulent	INTA204	1	37922	37922	cold	TA	15	33	2			0	41,8121407098782	NA	Homo sapiens					HawaiI			20
Leptospira interrogans str. 2002000621 ctg7180000004586	193407	NZ_AFLU02000001.1	interrogans	P1-virulent	INTA212	3227	41150	37924	cold	TA	15	33	2			0	41,8072988081426	34,6970408340462	Homo sapiens					HawaiI			16
Leptospira interrogans str. 2002000632 ctg7180000006509	50405	NZ_ANMW01000091.1	interrogans	P1-virulent	INNN205	12501	50405	37905	cold	TA	15	33	2			0	41,8045112781955	NA	Homo sapiens					HawaiI			20
Leptospira interrogans str. 2002000632 ctg7180000006431	105792	NZ_ANMW01000009.1	interrogans	P1-virulent	INNN206	67742	105792	38051	cold	TA	15	33	2			0	41,7781398649181	34,280568636424	Homo sapiens					HawaiI			20
Leptospira interrogans str. 2002000623 ctg7180000003982	168985	NZ_AHMG02000065.1	interrogans	P1-virulent	INTA211	69867	107790	37924	cold	TA	15	33	2			0	41,8072988081426	33,7774013627242	Homo sapiens					HawaiI			17
Leptospira mayottensis 200901122 ctg7180000003545	314411	NZ_AKWM02000078.1	mayottensis	P1-virulent	MANN179	162230	202140	39911	cold	TA	21	75	3			0	42,0660970659718	39,6293570762415	Homo sapiens					Mayotte
Leptospira santarosai serovar Shermani str. 1342KT ctg1134731470769	94407	NZ_AOHB02000048.1	santarosai	P1-virulent	SATA173	49961	89435	39475	cold	TA	24	104	4			0	43,2349588347055	42,2759047549698	Homo sapiens					Panama		2011	36
Leptospira santarosai str. 200702252 ctg7180000004055	188366	NZ_AHOA02000025.1	santarosai	P1-virulent	SATA171	79686	119781	40096	cold	TA	24	103	5			0	43,3883679169992	43,190800566534	Homo sapiens					Guadeloupe			40
Leptospira alexanderi strain 56643	46638	NZ_JQGU01000010.1	alexanderi	P1-virulent	AXNN237	4135	43728	39594	cold	TA	2	2	6			0	41,8270445016922	NA	Bos taurus					China, Yunnan	25.04 N 102.42 E	1972
Leptospira weilii strain CUDO6 chromosome II, complete sequence.	327104	NZ_CP040841.1	weilii	P1-virulent	WETA160	51427	90495	39069	cold	TA	2	122	7			0	42,2918426373851	41,1172253371986	Dog, urine					Thailand, Nan province	18.7673 N 100.776 E	2014	53
Leptospira weilii strain CUD13 chromosome I, complete sequence.	3978120	NZ_CP040843.1	weilii	P1-virulent	WETA161	253074	292123	39050	cold	TA	2	122	7			0	42,2893725992318	40,9372516863118	Dog, urine					Thailand, Nan province	18.7673 N 100.776 E	2014	52
Leptospira interrogans serovar Grippotyphosa str. Andaman ctg7180000004480	283503	NZ_AKXG02000014.1	interrogans	P1-virulent	INTA229	135573	174333	38761	cold	TA	14	35	8			0	40,0144475116741	35,0254553774996									6
Leptospira interrogans strain 56652 Contig004	79106	NZ_JQPW01000004.1	interrogans	P1-virulent	INTA191	10434	49000	38567	cold	TA	14	36	9			0	39,959032333342	NA	Homo sapiens					China, Hainan	20.02 N 110.20 E	1967	26
Leptospira interrogans strain 20046 Contig062	130308	NZ_JQPC01000056.1	interrogans	P1-virulent	INTA195	82066	120746	38681	cold	TA	14	38	10			0	40,0661823634342	35,5211891691314	Bos taurus					China, Sichuan	30.67 N 104.06 E	2000
Leptospira kanakyensis strain 201800294 contig_0003	687004	NZ_RQFE01000031.1	kanakyensis	S1	KANN185	125209	164294	39086	cold	TG1	16	65	11			0	39,5461290487643	38,7206405748876	soil					New Caledonia		2017
Leptospira kanakyensis strain 201800293 contig_0003	696716	NZ_RQFF01000037.1	kanakyensis	S1	KANN186	532423	571508	39086	cold	TG1	16	65	11			0	39,5461290487643	38,6893846083664	soil					New Caledonia		2017
Leptospira licerasiae serovar Varillal str. MMD0835 contig_23	275464	NZ_AFLO01000023.1	licerasiae	P2	LINN181	71180	110634	39455	cold	TG1	19	73	12			0	42,7981244455709	40,9480146943549	Philander sp.					Peru, Iquitos
Leptospira licerasiae ATCC BAA-1110 T343DRAFT_scaffold00002.2_C	636300	NZ_JAGX01000002.1	licerasiae	P2	LINN182	164907	204361	39455	cold	TG1	19	73	12			0	42,8006589785832	40,5696621400866
Leptospira licerasiae serovar Varillal str. VAR 010 7180000002868	1668761	NZ_AHOO02000005.1	licerasiae	P2	LINN180	171383	210837	39455	cold	TG1	19	73	12			0	42,7981244455709	41,0078892485512	Homo sapiens					Peru, Varillal village – Iquitos
Leptospira interrogans serovar Pyrogenes str. Sri Lanka 39 ctg7180000004827	41915	NZ_AOWP01000036.1	interrogans	P1-virulent	INNN218	1	37362	37362	cold	TG1	8	11	13			0	40,7767250147208	NA	Homo sapiens					Sri-Lanka			14
Leptospira interrogans serovar Pyrogenes str. Sri Lanka 30 ctg7180000005330	40161	NZ_AOWO01000051.1	interrogans	P1-virulent	INNN219	365	38161	37797	cold	TG1	8	11	13			0	40,725454401143	NA	Not specified					Sri-Lanka			13
Leptospira interrogans serovar Pyrogenes str. Sri Lanka 46 ctg7180000005354	43638	NZ_AOWQ01000119.1	interrogans	P1-virulent	INNN215	1293	39094	37802	cold	TG1	8	11	13			0	40,725358446643	NA									15
Leptospira interrogans serovar Pyrogenes str. SriLanka1 contig_151	41080	NZ_AHQM01000151.1	interrogans	P1-virulent	INNN214	1302	39098	37797	cold	TG1	8	11	13			0	40,725454401143	NA
Leptospira interrogans str. C10069 ctg7180000002895	233674	NZ_AFLZ02000039.1	interrogans	P1-virulent	INNN198	116690	154490	37801	cold	TG1	8	11	13			0	40,723790375916	35,6843464898174	Rodentia					Thailand
Leptospira interrogans str. 2003000735 ctg7180000006008	70483	NZ_ANMX01000158.1	interrogans	P1-virulent	INTG201	2782	40732	37951	cold	TG1	8	47	14			0	40,9396326842507	NA	Homo sapiens					HawaiI			21
Leptospira interrogans str. 2002000632 ctg7180000006581	95327	NZ_ANMW01000068.1	interrogans	P1-virulent	INTG203	3108	41058	37951	cold	TG1	8	47	14			0	40,9396326842507	36,3566648075851	Homo sapiens					HawaiI			20
Leptospira interrogans str. 2002000624 ctg7180000003987	81146	NZ_AFJK02000056.1	interrogans	P1-virulent	INTG210	13058	51148	38091	cold	TG1	8	47	14			0	40,9178021054842	NA	Homo sapiens					HawaiI			18
Leptospira interrogans str. 2002000621 ctg7180000004578	90915	NZ_AFLU02000045.1	interrogans	P1-virulent	INTG213	18662	56752	38091	cold	TG1	8	47	14			0	40,9178021054842	38,4768287142208	Homo sapiens					HawaiI			16
Leptospira interrogans str. 2002000631 ctg7180000006584	70036	NZ_ANMV01000107.1	interrogans	P1-virulent	INNN207	29337	67427	38091	cold	TG1	8	47	14			0	40,9178021054842	NA	Homo sapiens					HawaiI			19
Leptospira interrogans serovar Medanensis str. L0887 contig_149	59795	NZ_AHQW01000149.1	interrogans	P1-virulent	INNN222	5811	43580	37770	cold	TG1	8	44	15			0	41,0431559438708	NA
Leptospira interrogans serovar Bataviae str. UT234	59795	NZ_AHQV01000373.1	interrogans	P1-virulent	INNN233	5811	43580	37770	cold	TG1	8	44	15			0	41,0431559438708	NA
Leptospira interrogans serovar Medanensis str. L0448 ctg7180000005358	117354	NZ_AHNA02000062.1	interrogans	P1-virulent	INNN223	17931	55700	37770	cold	TG1	8	44	15			0	41,0431559438708	36,4017893043828	Homo sapiens					Thailand
Leptospira interrogans str. L0996 ctg7180000005488	166357	NZ_AHNB02000037.1	interrogans	P1-virulent	INNN197	77453	115222	37770	cold	TG1	8	44	15			0	41,0431559438708	35,3558291273612	Homo sapiens					Thailand
Leptospira interrogans serovar Icterohaemorrhagiae strain Langkawi chromosome 2	395410	NZ_CP043877.1	interrogans	P1-virulent	INNN226	210418	247074	36657	cold	TG1	8	52	16			0	40,8271271517036	35,0366408085786	Homo sapiens	Chordata	Mammalia	Primates	Europe	Netherlands		2004	8
Leptospira interrogans strain 56625 Contig027	37509	NZ_JQPI01000027.1	interrogans	P1-virulent	INNN193	3	37509	37507	cold	TG1	8	62	17			0	41,0270082917855	NA	Homo sapiens					China, Zhengjiang	30.16 N 120.10 E	1965
Leptospira interrogans strain 702 Contig003	92121	NZ_LMXF01000003.1	interrogans	P1-virulent	INNN189	4935	42648	37714	cold	TG1	8	57	18			0	40,5817468314154	36,6827797893653	dog, blood					France	45.72 N 4.82 E	2011
Leptospira interrogans serovar Jalna str. 2008720116 ctg7180000004613	123889	NZ_AOXA01000160.1	interrogans	P1-virulent	INNN225	5024	42737	37714	cold	TG1	8	57	18			0	40,5843983666543	36,7519582245431
Leptospira interrogans strain 733 Contig001	101977	NZ_LMXK01000001.1	interrogans	P1-virulent	INNN188	14791	52504	37714	cold	TG1	8	57	18			0	40,5817468314154	36,568476417223	dog, blood					France	45.72 N 4.82 E	2011
Leptospira interrogans serovar Muenchen str. Brem 129 ctg7180000003511	145261	NZ_AHMQ02000007.1	interrogans	P1-virulent	INNN221	26171	63884	37714	cold	TG1	8	57	18			0	40,5790952961765	36,3766539280501	Equus ferus caballus					Germany, Bayern
Leptospira interrogans serovar Bratislava str. Brem 137	153404	NZ_AHQH01000034.1	interrogans	P1-virulent	INNN231	66218	103931	37714	cold	TG1	8	57	18			0	40,5817468314154	35,7872980732644
Leptospira interrogans serovar Jalna str. 2008720117 ctg7180000004467	153981	NZ_AOWZ01000055.1	interrogans	P1-virulent	INNN224	66529	104242	37714	cold	TG1	8	57	18			0	40,5843983666543	35,8209982196152
Leptospira interrogans serovar Muenchen strain acegua SCAFFOLD00124	179419	NZ_LCZF01000124.1	interrogans	P1-virulent	INNN220	81132	118844	37713	cold	TG1	8	57	18			0	40,5828228992655	36,0827652397284	Bovine, fœtus					Brazil, Acegua City	31.45 S 54.3 W	2010
Leptospira weilii strain CUD13 chromosome I, complete sequence.	3978120	NZ_CP040843.1	weilii	P1-virulent	WENN162	1494546	1531862	37317	cold	TG1	20	119	19			0	42,5275343677144	40,9355910457843	Dog, urine					Thailand, Nan province	18.7673 N 100.776 E	2014	52
Leptospira borgpetersenii serovar Mini str. 201000851	729488	NZ_AHOS02000002.1	borgpetersenii	P1-virulent	BONN234	587394	625344	37951	cold	TG1	3	3	20			0	42,6892572000738	38,9555439549872	Homo sapiens					Mayotte
Leptospira sp. Fiocruz LV4135 ctg7180000013262	90936	NZ_AOHI01000071.1	unclassified	Other	UNNN165	54945	90936	35992	cold	TG1	23	114	21			0	43,0540120026673	42,4941758881771	Homo sapiens					Brazil, Camacar			46
Leptospira kirschneri serovar Bulgarica str. Nikolaevo ctg7180000006234	56571	NZ_ANCE01000169.1	kirschneri	P1-virulent	KINN183	1	36956	36956	hot	TG3	18	69	22			0	41,3681134321896	NA	Homo sapiens					Bulgaria			29
Leptospira kirschneri serovar Bulgarica str. Nikolaevo ctg7180000006167	47354	NZ_ANCE01000079.1	kirschneri	P1-virulent	KINN184	1	36895	36895	hot	TG3	18	69	22			0	41,3795907304513	NA	Homo sapiens					Bulgaria			29
Leptospira noguchii serovar Panama str. CZ214 ctg1134732786337	106299	NZ_AKWY02000016.1	noguchii	P1-virulent	NONN176	1	35576	35576	hot	TG3	22	84	23			0	41,9636833820553	36,6514429534946	Didelphis marsupialis					Panama, canal zone			31
Leptospira noguchii serovar Panama str. CZ214 ctg1134732786332	118954	NZ_AKWY02000018.1	noguchii	P1-virulent	NOTG177	40	35578	35539	hot	TG3	22	84	23			0	41,9820478910493	34,3391476353174	Didelphis marsupialis					Panama, canal zone			31
Leptospira noguchii strain 56682 Contig109	56443	NZ_JQRF01000109.1	noguchii	P1-virulent	NOTG174	16864	52302	35439	hot	TG3	22	84	23			0	42,0073929851294	NA	Sus scrofa					China, Ningxia	38.27 N 106.16 E	1981
Leptospira noguchii serovar Panama str. CZ214 ctg1134732786311	180862	NZ_AKWY02000031.1	noguchii	P1-virulent	NONN178	145468	180862	35395	hot	TG3	22	84	23			0	42,0483119084617	36,0404765341968	Didelphis marsupialis					Panama, canal zone			31
Leptospira santarosai strain 56663 Contig002	128481	NZ_JQRM01000002.1	santarosai	P1-virulent	SANN167	1	35900	35900	hot	TG3	22	96	24			0	42,9693593314763	41,6726974217172	Ondatra zibethicus	Chordata	Mammalia	Rodentia	Asia	China, Sichuan	30.40 N 104.04 E	1980
Leptospira santarosai strain 56163 Contig021	128485	NZ_JQRG01000021.1	santarosai	P1-virulent	SANN168	1	35902	35902	hot	TG3	22	96	24			0	42,9697509888029	41,6728773100893	Procyon lotor	Chordata	Mammalia	Carnivora	North_America	USA		1952
Leptospira weilii strain 56679 Contig061	46282	NZ_JQQA01000061.1	weilii	P1-virulent	WENN163	1	36762	36762	hot	TG3	12	126	25			0	42,6717806430553	NA	Homo sapiens					China, Sichuan	30.40 N 104.04 E	1982	51
Leptospira weilii strain CUDO6 chromosome I, complete sequence.	3965053	NZ_CP040840.1	weilii	P1-virulent	WETG159	2039451	2076388	36938	hot	TG3	12	118	26			0	42,5821647084303	40,9138225331998	Dog, urine					Thailand, Nan province	18.7673 N 100.776 E	2014	53
Leptospira interrogans serovar Grippotyphosa str. UI 08368 ctg7180000004335	249892	NZ_AHNJ02000028.1	interrogans	P1-virulent	INTG228	144648	180509	35862	hot	TG3	12	53	27			0	41,7015225029279	34,8628696911648	Homo sapiens					Laos
Leptospira interrogans serovar Icterohaemorrhagiae strain Langkawi chromosome 1	4367462	NZ_CP043876.1	interrogans	P1-virulent	INNN227	1033343	1070422	37080	hot	TG3	12	51	28			0	41,3888888888889	35,0766745289446	Homo sapiens	Chordata	Mammalia	Primates	Europe	Netherlands		2004	8
Leptonema illini strain 56270	41328	NZ_JQDG01000029.1	illini	Other	ILNN238	1	41328	41328	cold	IL	7	7	29			0	54,7498064266357	NA						Panama, canal zone		1990
Leptospira interrogans strain J9 Contig161	37680	NZ_JQPA01000161.1	interrogans	P1-virulent	INNN187	288	37284	36997	hot	TG2	11	19	30			0	38,0787631429575	NA	Rattus flavipectus					China, Jiangxi	28.40 N 115.55 E	2006	28
Leptospira interrogans strain 56630 Contig019	73109	NZ_JQPN01000019.1	interrogans	P1-virulent	INNN192	15699	52695	36997	hot	TG2	11	19	30			0	38,0679514555234	NA	Rattus					China, Yunnan	25.04 N 102.42 E	1960
Leptospira interrogans strain 56608 Contig125	73109	NZ_JQQT01000124.1	interrogans	P1-virulent	INNN194	20415	57411	36997	hot	TG2	11	19	30			0	38,0679514555234	NA	Homo sapiens					China, Fujian	26.05 N 119.18 E	1958
Leptospira interrogans strain 56652 Contig044	54749	NZ_JQPW01000044.1	interrogans	P1-virulent	INTG190	1727	40682	38956	hot	TG2	11	60	31			0	37,69894239655	NA	Homo sapiens					China, Hainan	20.02 N 110.20 E	1967	26
Leptospira interrogans serovar Pyrogenes str. Sri Lanka 46 ctg7180000005295	40867	NZ_AOWQ01000060.1	interrogans	P1-virulent	INNN216	338	37798	37461	hot	TG2	11	13	32			0	37,8847334561277	NA									15
Leptospira interrogans str. UI 12758 ctg7180000005473	202327	NZ_AHNR02000040.1	interrogans	P1-virulent	INTG196	15561	52468	36908	hot	TG2	11	55	33			0	38,0594992955457	35,731687411966	Homo sapiens	Chordata	Mammalia	Primates	Asia	Laos			23
Leptospira interrogans serovar Grippotyphosa str. 2006006986 ctg7180000004633	745790	NZ_AKXC02000018.1	interrogans	P1-virulent	INNN230	66679	103719	37041	hot	TG2	11	55	33			0	38,0416295456386	34,3358509147808	Homo sapiens	Chordata	Mammalia	Primates	Africa	Egypt			5
Leptospira interrogans serovar Pyrogenes str. Sri Lanka 39 ctg7180000004878	104206	NZ_AOWP01000087.1	interrogans	P1-virulent	INTG217	8546	45638	37093	hot	TG2	11	50	34			0	37,9829078262745	35,0587814581378	Homo sapiens					Sri-Lanka			14
Leptospira noguchii str. Cascata ctg7180000011320	48949	NZ_AOUB01000122.1	noguchii	P1-virulent	NONN175	6481	43406	36926	hot	TG2	11	83	35			0	38,4769539078156	NA	Homo sapiens					Brazil, Pelotas
Leptospira santarosai str. 200702252 ctg7180000004056	44053	NZ_AHOA02000010.1	santarosai	P1-virulent	SANN170	5998	43651	37654	hot	TG2	11	95	36			0	38,7342646199607	NA	Homo sapiens					Guadeloupe			40
Leptospira sp. Fiocruz LV3954 ctg7180000005033	89845	NZ_AKWV02000040.1	unclassified	Other	UNNN166	55135	89845	34711	hot	TG2	11	85	37			0	39,0510212900809	41,6846534743257	Homo sapiens					Brazil, Salvador			45
Leptospira santarosai str. AIM ctg7180000006113	90019	NZ_AKWT02000007.1	santarosai	P1-virulent	SANN169	6267	42849	36583	hot	TG2	11	85	38			0	39,0017221113632	43,2760685680066	Homo sapiens					Columbia, Medellin			41
Leptospira santarosai serovar Shermani str. 1342KT ctg1134731470791	174636	NZ_AOHB02000057.1	santarosai	P1-virulent	SATG172	54778	91219	36442	hot	TG2	11	85	38			0	39,0950002744086	43,4418281546232	Homo sapiens					Panama		2011	36
Leptospira interrogans serovar Bim str. P2529 contig_797	54334	NZ_AHQS01000797.1	interrogans	P1-virulent	INNN232	1962	40644	38683	hot	NN	9	9	39			0	41,912468009203	NA									3
Leptospira sp. serovar Kenya str. Sh9 ctg7180000004565	42281	NZ_ANIG01000026.1	borgpetersenii	P1-virulent	BONN164	914	38040	37127	hot	NN	4	4	40			0	44,0353381636006	NA	Rana pipiens	Chordata	Amphibia	Anura	Africa	Tanzania, Kilakala swamp

## Sheet: S3
Estimated number of leptospiral genomes in RefSeq and of the number of prophages they contain
# hits against WETA1’s Transposase	# prophages per category	# leptospiral strains with At least 1 prophage	# leptospiral genomes (estimated using rpoB)	% of leptospiral strains With at least 1 prophage	average number of Prophages by genomes	Category color
11	9	6	13	0,46	1,50	Other
5	3	3	31	0,10	1,00	P1-Low-virulent
304	215	145	558	0,26	1,48	P1-virulent
5	5	5	40	0,13	1,00	P2
5	4	4	67	0,06	1,00	S1
0	0	0	5	0,00	0,00	S2
330	236	163	714	0,23	1,45	TOTAL
Detail of the numbers above per leptospiral species, columns are in the same order
Cells are left empty when no transposase was found in a givens pecies
						Species	Category
2	2	2	2	1,00	1,00	Leptonema Illini	Other
9	7	4	10	0,40	1,75	sp.	Other
			1			Turneriella parva	Other
2			2			ellisii	P1-Low-virulent
3	3	3	4	0,75	1,00	stimsonii	P1-Low-virulent
			3			adleri	P1-Low-virulent
			2			barantonii	P1-Low-virulent
			4			gomenensis	P1-Low-virulent
			7			kmetyi	P1-Low-virulent
			1			tipperaryensis	P1-Low-virulent
			8			yasudae	P1-Low-virulent
36	23	12	19	0,63	1,92	weilii	P1-virulent
52	35	25	39	0,64	1,40	santarosai	P1-virulent
19	16	10	17	0,59	1,60	noguchii	P1-virulent
4	2	2	5	0,40	1,00	alstonii	P1-virulent
18	8	6	34	0,18	1,33	kirschneri	P1-virulent
3	3	3	6	0,50	1,00	mayottensis	P1-virulent
164	119	78	330	0,24	1,53	interrogans	P1-virulent
2	2	2	6	0,33	1,00	alexanderi	P1-virulent
6	7	7	102	0,07	1,00	borgpetersenii	P1-virulent
5	5	5	5	1,00	1,00	licerasiae	P2
			1			andrefontaineae	P2
			1			broomii	P2
			1			dzoumogneensis	P2
			1			fainei	P2
			1			fletcheri	P2
			1			fluminis	P2
			2			haakeii	P2
			2			hartskeerlii	P2
			2			inadai	P2
			1			johnsonii	P2
			1			koniambonensis	P2
			2			langatensis	P2
			1			neocaledonica	P2
			2			perolatii	P2
			1			saintgironsiae	P2
			1			sarikeiensis	P2
			3			selangorensis	P2
			1			semungkisensis	P2
			3			venezuelensis	P2
			7			wolffii	P2
3	3	3	3	1,00	1,00	kanakyensis	S1
1			2			brenneri	S1
1	1	1	3	0,33	1,00	bouyouniensis	S1
			2			bandrabouensis	S1
			7			biflexa	S1
			4			bourretii	S1
			3			congkakensis	S1
			1			ellinghausenii	S1
			2			harrisiae	S1
			2			jelokensis	S1
			1			kemamanensis	S1
			15			levettii	S1
			11			meyeri	S1
			2			montravelensis	S1
			1			mtsangambouensis	S1
			1			noumeaensis	S1
			1			perdikensis	S1
			1			terpstrae	S1
			2			vanthielii	S1
			1			wolbachii	S1
			2			yanagawae	S1
			1			idonii	S2
			1			ilyithenensis	S2
			1			kobayashii	S2
			1			ognonensis	S2
			1			ryugenii	S2

## Sheet: S4
OG table
Each section is defined by its color and header.
			Presence/absence matrix, rows : OG, columns : transposable phages and prophages (cells are green when an OG is present on the given genome)
			Leptospira LE4	Leptospira LE1	Leptospira LE3	Pseudomonas F_HA0480sp/Pa1651	Pseudomonas JBD26	Pseudomonas PaMx73	Bacillus BalMu-1_2	Thiobacimonas vB_ThpS-P1	Pseudomonas YMC11/11/R1836	Ochrobactrum POA1180	Alteromonadaceae B23	Pseudomonas VW-6B	Faecalibacterium FP_Mushu	Enterobacteria Mu	Pseudomonas D3112	Burkholderia BcepMu	Pseudomonas B3	Pseudomonas DMS3	Burkholderia phiE255	Pseudomonas MP22	Burkholderia KS10	Pseudomonas MP38	Pseudomonas MP29	Escherichia D108	Rhodobacter RcapMu	Pseudomonas MP42	Haemophilus SuMu	Pseudomonas JBD30	Pseudomonas JBD88a	Pseudomonas JBD5	Pseudomonas JBD24	Rhodobacter RC1	Rhodovulum RS1	Vibrio martha_12B12	Rhizobium RR1-B	Pseudomonas PA1/KOR/2010	Pseudomonas JD024	Pseudomonas MP48	Pseudomonas vB_PaeS_PAO1_Ab30	Pseudomonas LPB1	Enterobacteria SfMu	Pseudomonas H70	Pseudomonas JBD18	Pseudomonas JBD25	Pseudomonas vB_PaeS_PM105	Mannheimia vB_MhM_3927AP2	Ralstonia RS138
	OG Number		NC_048679	NC_048892	NC_048678	JN808773	JN811560	JQ067085	KP063903	KT381864	KT968832	KX669658	KY939598	MF975721	MG711460	NC_000929	NC_005178	NC_005882	NC_006548	NC_008717	NC_009237	NC_009818	NC_011216	NC_011611	NC_011613	NC_013594	NC_016165	NC_018274	NC_019455	NC_020198	NC_020200	NC_020202	NC_020203	NC_020839	NC_020866	NC_021070	NC_021557	NC_023700	NC_024330	NC_024782	NC_026601	NC_027298	NC_027382	NC_027384	NC_027986	NC_027992	NC_028667	NC_028766	NC_029107
nb_prot			81	81	83	55	61	56	56	52	59	58	50	46	54	55	55	53	59	52	55	51	49	51	51	57	58	53	55	56	55	59	58	56	56	51	52	51	58	50	59	54	55	58	52	55	56	50	56
nb_singletons			2	60	5	1	0	1	0	17	1	27	13	12	29	0	0	7	9	0	8	0	16	0	0	4	21	0	18	0	0	1	0	1	1	16	20	0	0	0	0	0	2	0	2	6	4	15	21
	1		0	2	0	0	0	0	0	0	0	0	0	0	0	0	0	0	0	0	0	0	0	0	0	0	0	0	0	0	0	0	0	0	0	0	0	0	0	0	0	0	0	0	0	0	0	0	0
	2		0	0	0	1	1	1	1	1	1	1	1	1	1	1	1	1	1	1	1	1	1	1	1	1	1	1	1	1	1	1	1	1	1	1	1	1	1	1	1	1	1	1	1	1	1	1	2
	3		0	0	0	1	1	1	1	1	1	1	1	1	1	1	1	1	1	1	1	1	1	1	1	1	1	1	1	1	1	1	1	1	1	1	1	1	1	1	1	1	1	1	1	1	1	1	2
	4		0	0	0	1	1	1	0	0	1	0	0	1	0	0	1	0	0	1	0	1	1	1	1	0	1	1	1	1	1	1	1	0	0	0	1	1	1	1	1	1	0	1	0	0	0	1	1
	5		0	0	0	1	1	1	1	0	1	0	0	0	1	1	1	0	0	1	0	1	0	1	1	1	1	1	1	1	1	1	1	0	0	0	1	1	1	1	0	0	1	1	0	0	0	0	0
	6		0	0	0	1	1	1	1	1	1	1	1	1	1	1	1	1	1	1	1	1	1	1	1	1	1	1	1	1	1	1	1	1	1	1	1	1	1	1	1	1	1	1	1	1	1	1	1
	7		1	1	1	0	0	0	1	0	0	1	1	0	1	1	0	1	0	0	1	0	1	0	0	1	0	0	1	0	0	0	0	0	0	1	1	0	0	0	0	0	1	0	0	0	0	1	0
	8		0	0	0	0	0	0	0	0	0	0	0	0	0	0	0	0	0	0	0	0	0	0	0	0	0	0	0	0	0	0	0	0	0	0	0	0	0	0	0	0	0	0	0	0	0	0	0
	9		0	0	0	0	0	0	0	0	0	0	0	0	0	0	0	0	0	0	0	0	0	0	0	0	0	0	0	0	0	0	0	0	0	0	0	0	0	0	0	0	0	0	0	0	0	0	0
	10		0	0	0	0	0	0	0	0	0	0	0	0	0	0	0	0	0	0	0	0	0	0	0	0	0	0	0	0	0	0	0	0	0	0	0	0	0	0	0	0	0	0	0	0	0	0	0
	11		0	0	0	1	1	1	0	1	1	1	1	1	1	1	1	1	1	1	1	1	1	1	1	1	1	1	1	1	1	1	1	1	1	1	1	1	1	1	1	1	1	1	1	1	1	1	1
	12		0	0	0	0	0	0	0	0	0	0	0	0	0	0	0	0	0	0	0	0	0	0	0	0	0	0	0	0	0	0	0	0	0	0	0	0	0	0	0	0	0	0	0	0	0	0	0
	13		0	0	0	0	0	0	0	0	0	0	0	0	0	0	0	0	0	0	0	0	0	0	0	0	0	0	0	0	0	0	0	0	0	0	0	0	0	0	0	0	0	0	0	0	0	0	0
	14		0	0	0	0	0	0	0	0	0	0	0	0	0	0	0	0	0	0	0	0	0	0	0	0	0	0	0	0	0	0	0	0	0	0	0	0	0	0	0	0	0	0	0	0	0	0	0
	15		0	0	0	0	0	0	0	0	0	0	0	0	0	0	0	0	0	0	0	0	0	0	0	0	0	0	0	0	0	0	0	0	0	0	0	0	0	0	0	0	0	0	0	0	0	0	0
	16		1	0	1	0	0	0	0	0	0	0	0	0	0	0	0	0	0	0	0	0	0	0	0	0	0	0	0	0	0	0	0	0	0	0	0	0	0	0	0	0	0	0	0	0	0	0	0
	17		0	0	0	0	0	0	0	0	0	0	0	0	0	0	0	0	0	0	0	0	0	0	0	0	0	0	0	0	0	0	0	0	0	0	0	0	0	0	0	0	0	0	0	0	0	0	0
	18		0	1	0	0	0	0	0	0	0	0	0	0	0	0	0	0	0	0	0	0	0	0	0	0	0	0	0	0	0	0	0	0	0	0	0	0	0	0	0	0	0	0	0	0	0	0	0
	19		0	0	0	0	0	0	0	0	0	0	0	0	0	0	0	0	0	0	0	0	0	0	0	0	0	0	0	0	0	0	0	0	0	0	1	0	0	0	0	0	0	0	0	0	0	0	0
	20		0	1	0	0	0	0	0	0	0	0	0	0	0	0	0	0	0	0	0	0	0	0	0	0	0	0	0	0	0	0	0	0	0	0	0	0	0	0	0	0	0	0	0	0	0	0	0
	21		0	0	0	0	0	0	0	0	0	0	0	0	0	0	0	0	0	0	0	0	0	0	0	0	0	0	0	0	0	0	0	0	0	0	0	0	0	0	0	0	0	0	0	0	0	0	0
	22		0	0	0	0	0	0	0	0	0	0	0	0	0	0	0	1	0	0	1	0	0	0	0	0	0	0	0	0	0	0	0	0	0	0	1	0	0	0	0	0	0	0	0	0	0	0	0
	23		0	0	0	0	0	0	0	0	0	0	0	0	1	0	0	0	0	0	0	0	0	0	0	0	0	0	0	0	0	0	0	0	0	0	0	0	0	0	0	0	0	0	0	0	0	0	0
	24		0	0	0	0	0	0	0	0	0	0	0	0	1	0	0	0	0	0	0	0	0	0	0	0	0	0	0	0	0	0	0	0	0	0	0	0	0	0	0	0	0	0	0	0	0	0	0
	25		0	0	0	0	0	0	0	0	0	0	0	0	0	0	0	0	0	0	0	0	0	0	0	0	0	0	0	0	0	0	0	0	0	0	0	0	0	0	0	0	0	0	0	0	0	0	0
	26		0	0	0	0	0	0	0	0	0	0	0	0	0	0	0	0	0	0	0	0	0	0	0	0	0	0	0	0	0	0	0	0	0	0	0	0	0	0	0	0	0	0	0	0	0	0	0
	27		0	0	0	0	0	0	0	0	0	0	0	0	0	0	0	0	0	0	0	0	0	0	0	0	0	0	0	0	0	0	0	0	0	0	0	0	0	0	0	0	0	0	0	0	0	0	0
	28		0	0	0	0	0	0	0	0	0	0	0	0	0	0	0	0	0	0	0	0	0	0	0	0	0	0	0	0	0	0	0	0	0	0	0	0	0	0	0	0	0	0	0	0	0	0	0
	29		0	0	0	0	0	0	0	0	0	0	0	0	0	0	0	0	0	0	0	0	0	0	0	0	0	0	0	0	0	0	0	0	0	0	0	0	0	0	0	0	0	0	0	0	0	0	0
	30		0	0	0	0	0	0	0	0	0	0	0	0	0	0	0	0	0	0	0	0	0	0	0	0	0	0	0	0	0	0	0	0	0	0	0	0	0	0	0	0	0	0	0	0	0	0	0
	31		0	0	0	0	0	0	0	0	0	0	0	0	0	0	0	0	0	0	0	0	0	0	0	0	0	0	0	0	0	0	0	0	0	0	0	0	0	0	0	0	0	0	0	0	0	0	0
	32		0	0	0	0	0	0	0	0	0	0	0	0	0	0	0	0	0	0	0	0	0	0	0	0	0	0	0	0	0	0	0	0	0	0	0	0	0	0	0	0	0	0	0	0	0	0	0
	33		0	0	0	0	0	0	0	0	0	0	0	0	0	0	0	0	0	0	0	0	0	0	0	0	0	0	0	0	0	0	0	0	0	0	0	0	0	0	0	0	0	0	0	0	0	0	0
	34		0	0	0	0	0	0	0	0	0	0	0	0	0	0	0	0	0	0	0	0	0	0	0	0	0	0	0	0	0	0	0	0	0	0	0	0	0	0	0	0	0	0	0	0	0	0	0
	35		0	0	0	0	0	0	0	0	0	0	0	0	0	0	0	0	0	0	0	0	0	0	0	0	0	0	0	0	0	0	0	0	0	0	0	0	0	0	0	0	0	0	0	0	0	0	0
	36		0	0	0	0	0	0	0	0	0	0	0	0	0	0	0	0	0	0	0	0	0	0	0	0	0	0	0	0	0	0	0	0	0	0	0	0	0	0	0	0	0	0	0	0	0	0	0
	37		0	0	0	0	0	0	0	0	0	0	0	0	0	0	0	0	0	0	0	0	0	0	0	0	0	0	0	0	0	0	0	0	0	0	0	0	0	0	0	0	0	0	0	0	0	0	0
	38		0	0	0	0	0	0	0	0	0	0	0	0	0	0	0	0	0	0	0	0	0	0	0	0	0	0	0	0	0	0	0	0	0	0	0	0	0	0	0	0	0	0	0	0	0	0	0
	39		0	0	0	0	0	0	0	0	0	0	0	0	0	0	0	0	0	0	0	0	0	0	0	0	0	0	0	0	0	0	0	0	0	0	0	0	0	0	0	0	0	0	0	0	0	0	0
	40		0	0	0	0	0	0	0	0	0	0	0	0	0	0	0	0	0	0	0	0	0	0	0	0	0	0	0	0	0	0	0	0	0	0	0	0	0	0	0	0	0	0	0	0	0	0	0
	41		0	0	0	0	0	0	0	0	0	0	0	0	0	0	0	0	0	0	0	0	0	0	0	0	0	0	0	0	0	0	0	0	0	0	0	0	0	0	0	0	0	0	0	0	0	0	0
	42		0	0	0	0	0	0	0	0	0	0	0	0	0	0	0	0	0	0	0	0	0	0	0	0	0	0	0	0	0	0	0	0	0	0	1	0	0	0	0	0	0	0	0	0	0	0	0
	43		0	0	0	0	0	0	0	0	0	0	0	0	0	0	0	0	0	0	0	0	0	0	0	0	0	0	0	0	0	0	0	0	0	0	0	0	0	0	0	0	0	0	0	0	0	0	0
	44		0	0	0	0	0	0	0	0	0	0	0	0	0	0	0	0	0	0	0	0	0	0	0	0	0	0	0	0	0	0	0	0	0	0	0	0	0	0	0	0	0	0	0	0	0	0	0
	45		0	0	0	0	0	0	0	0	0	0	0	0	0	0	0	0	0	0	0	0	0	0	0	0	0	0	0	0	0	0	0	0	0	0	0	0	0	0	0	0	0	0	0	0	0	0	0
	46		0	0	0	0	0	0	0	0	0	0	0	0	0	0	0	0	0	0	0	0	0	0	0	0	0	0	0	0	0	0	0	0	0	0	0	0	0	0	0	0	0	0	0	0	0	0	0
	47		0	1	0	0	0	0	0	0	0	0	0	0	0	0	0	0	0	0	0	0	0	0	0	0	0	0	0	0	0	0	0	0	0	0	0	0	0	0	0	0	0	0	0	0	0	0	0
	48		0	0	0	0	0	0	0	0	0	0	0	0	0	0	0	0	0	0	0	0	0	0	0	0	0	0	0	0	0	0	0	0	0	0	0	0	0	0	0	0	0	0	0	0	0	0	0
	49		0	0	0	0	0	0	0	0	0	0	0	0	0	0	0	0	0	0	0	0	0	0	0	0	0	0	0	0	0	0	0	0	0	0	0	0	0	0	0	0	0	0	0	0	0	0	0
	50		0	0	0	0	0	0	0	0	0	0	0	0	0	0	0	0	0	0	0	0	0	0	0	0	0	0	0	0	0	0	0	0	0	0	0	0	0	0	0	0	0	0	0	0	0	0	0
	51		0	0	0	0	0	0	0	0	0	0	0	0	0	0	0	0	0	0	0	0	0	0	0	0	0	0	0	0	0	0	0	0	0	0	0	0	0	0	0	0	0	0	0	0	0	0	0
	52		0	0	0	0	0	0	0	0	0	0	0	0	0	0	0	0	0	0	0	0	0	0	0	0	0	0	0	0	0	0	0	0	0	0	0	0	0	0	0	0	0	0	0	0	0	0	0
	53		0	0	0	0	0	0	0	0	0	0	0	0	0	0	0	0	0	0	0	0	0	0	0	0	0	0	0	0	0	0	0	0	0	0	0	0	0	0	0	0	0	0	0	0	0	0	0
	54		0	0	0	0	0	0	0	0	0	0	0	0	0	0	0	0	0	0	0	0	0	0	0	0	0	0	0	0	0	0	0	0	0	0	0	0	0	0	0	0	0	0	0	0	0	0	0
	55		0	0	0	0	0	0	0	0	0	0	0	0	0	0	0	0	0	0	0	0	0	0	0	0	0	0	0	0	0	0	0	0	0	0	0	0	0	0	0	0	0	0	0	0	0	0	0
	56		0	0	0	0	0	0	0	0	0	0	0	0	0	0	0	0	0	0	0	0	0	0	0	0	0	0	0	0	0	0	0	0	0	0	0	0	0	0	0	0	0	0	0	0	0	0	0
	57		0	0	0	0	0	0	0	0	0	0	0	0	0	0	0	0	0	0	0	0	0	0	0	0	0	0	0	0	0	0	0	0	0	0	0	0	0	0	0	0	0	0	0	0	0	0	0
	58		0	0	0	0	0	0	0	0	0	0	0	0	0	0	0	0	0	0	0	0	0	0	0	0	0	0	0	0	0	0	0	0	0	0	0	0	0	0	0	0	0	0	0	0	0	0	0
	59		0	0	0	0	0	0	0	0	0	0	0	0	0	0	0	0	0	0	0	0	0	0	0	0	0	0	0	0	0	0	0	0	0	0	0	0	0	0	0	0	0	0	0	0	0	0	0
	60		0	0	0	0	0	0	0	0	0	0	0	0	0	0	0	0	0	0	0	0	0	0	0	0	0	0	0	0	0	0	0	0	0	0	0	0	0	0	0	0	0	0	0	0	0	0	0
	61		0	0	0	0	0	0	0	0	0	0	0	0	0	0	0	0	0	0	0	0	0	0	0	0	0	0	0	0	0	0	0	0	0	0	0	0	0	0	0	0	0	0	0	0	0	0	0
	62		0	0	0	0	0	0	0	0	0	0	0	0	0	0	0	0	0	0	0	0	0	0	0	0	0	0	0	0	0	0	0	0	0	0	0	0	0	0	0	0	0	0	0	0	0	0	0
	63		0	0	0	0	0	0	0	0	0	0	0	0	0	0	0	0	0	0	0	0	0	0	0	0	0	0	0	0	0	0	0	0	0	0	0	0	0	0	0	0	0	0	0	0	0	0	0
	64		0	0	0	0	0	0	0	0	0	0	0	0	0	0	0	0	0	0	0	0	0	0	0	0	0	0	0	0	0	0	0	0	0	0	0	0	0	0	0	0	0	0	0	0	0	0	0
	65		0	0	0	0	0	0	0	0	0	0	0	0	0	0	0	0	0	0	0	0	0	0	0	0	0	0	0	0	0	0	0	0	0	0	0	0	0	0	0	0	0	0	0	0	0	0	0
	66		0	0	0	0	0	0	0	0	0	0	0	0	0	0	0	0	0	0	0	0	0	0	0	0	0	0	0	0	0	0	0	0	0	0	0	0	0	0	0	0	0	0	0	0	0	0	0
	67		0	0	0	0	0	0	0	0	0	0	0	0	1	0	0	0	0	0	0	0	0	0	0	0	0	0	0	0	0	0	0	0	0	0	0	0	0	0	0	0	0	0	0	0	0	0	0
	68		0	0	0	0	0	0	0	0	0	0	0	0	0	0	0	0	0	0	0	0	0	0	0	0	0	0	0	0	0	0	0	0	0	0	0	0	0	0	0	0	0	0	0	0	0	0	0
	69		0	0	0	0	0	0	0	0	0	0	0	0	0	0	0	0	0	0	0	0	0	0	0	0	0	0	0	0	0	0	0	0	0	0	0	0	0	0	0	0	0	0	0	0	0	0	0
	70		0	0	0	1	1	1	1	1	1	1	1	1	1	2	1	1	1	1	1	1	1	1	1	2	1	1	1	1	1	1	1	1	1	1	1	1	1	1	1	1	2	1	1	1	1	1	1
	71		0	0	0	0	0	0	0	0	0	0	0	0	0	0	0	0	0	0	0	0	0	0	0	0	0	0	0	0	0	0	0	0	0	0	0	0	0	0	0	0	0	0	0	0	0	0	0
	72		0	0	0	1	1	1	0	1	1	1	1	1	1	2	1	1	1	1	1	1	2	1	1	2	1	1	1	1	1	1	1	1	1	1	1	1	1	1	1	1	2	1	1	1	1	1	1
	73		0	0	0	0	0	0	0	0	0	0	0	0	0	0	0	0	0	0	0	0	0	0	0	0	0	0	0	0	0	0	0	0	0	0	0	0	0	0	0	0	0	0	0	0	0	0	0
	74		0	0	0	0	0	0	0	0	0	0	0	0	0	0	0	0	0	0	0	0	0	0	0	0	0	0	0	0	0	0	0	0	0	0	0	0	0	0	0	0	0	0	0	0	0	0	0
	75		0	0	0	1	1	1	0	1	1	1	1	1	1	1	1	1	1	1	1	1	1	1	1	1	1	1	1	1	1	1	1	1	1	1	1	1	1	1	1	1	1	1	1	1	1	1	1
	76		0	0	0	1	1	1	0	1	1	1	1	1	1	1	1	1	1	1	1	1	1	1	1	1	1	1	1	1	1	1	1	1	1	1	1	1	1	1	1	1	1	1	1	1	1	1	1
	77		0	0	0	0	0	0	0	0	0	0	0	0	0	0	0	0	0	0	0	0	0	0	0	0	0	0	0	0	0	0	0	0	0	0	0	0	0	0	0	0	0	0	0	0	0	0	0
	78		0	0	0	0	0	0	0	0	0	0	0	0	0	0	0	0	0	0	0	0	0	0	0	0	0	0	0	0	0	0	0	0	0	0	0	0	0	0	0	0	0	0	0	0	0	0	0
	79		0	0	0	0	0	0	0	0	0	0	0	0	0	0	0	0	0	0	0	0	0	0	0	0	0	0	0	0	0	0	0	0	0	0	0	0	0	0	0	0	0	0	0	0	0	0	0
	80		1	1	1	1	1	1	1	0	1	0	0	1	1	0	1	0	0	1	0	1	1	1	1	0	1	1	1	1	1	1	1	0	0	0	1	1	1	1	1	1	0	1	0	0	0	1	1
	81		0	0	0	1	1	1	0	1	1	1	1	1	1	1	1	1	1	1	1	1	1	1	1	1	0	1	1	1	1	1	1	1	1	1	0	1	1	1	1	1	1	1	1	0	1	1	1
	82		0	0	0	0	0	0	0	0	0	0	0	0	0	0	0	0	0	0	0	0	0	0	0	0	0	0	0	0	0	0	0	0	0	0	0	0	0	0	0	0	0	0	0	0	0	0	0
	83		0	0	0	0	0	0	0	0	0	0	0	0	0	0	0	0	0	0	0	0	0	0	0	0	0	0	0	0	0	0	0	0	0	0	0	0	0	0	0	0	0	0	0	0	0	0	0
	84		0	0	0	0	0	0	0	0	0	0	0	0	0	0	0	0	0	0	0	0	0	0	0	0	0	0	0	0	0	0	0	0	0	0	0	0	0	0	0	0	0	0	0	0	0	0	0
	85		0	0	0	0	0	0	0	0	0	0	0	0	0	0	0	0	0	0	0	0	0	0	0	0	0	0	0	0	0	0	0	0	0	0	0	0	0	0	0	0	0	0	0	0	0	0	0
	86		0	0	0	1	1	1	0	0	1	1	1	1	0	1	1	1	1	0	1	1	1	1	1	1	1	1	1	1	1	1	1	0	0	1	1	0	1	1	1	1	1	1	1	1	1	1	1
	87		0	0	0	0	0	0	0	0	0	0	0	0	0	0	0	0	0	0	0	0	0	0	0	0	0	0	0	0	0	0	0	0	0	0	0	0	0	0	0	0	0	0	0	0	0	0	0
	88		0	0	0	0	0	0	0	0	0	0	0	0	0	0	0	0	0	0	0	0	0	0	0	0	0	0	0	0	0	0	0	0	0	0	0	0	0	0	0	0	0	0	0	0	0	0	0
	89		0	0	0	0	0	0	0	0	0	0	0	0	0	0	0	0	0	0	0	0	0	0	0	0	0	0	0	0	0	0	0	0	0	0	0	0	0	0	0	0	0	0	0	0	0	0	0
	90		0	0	0	0	0	0	0	0	0	0	0	0	0	0	0	0	0	0	0	0	0	0	0	0	0	0	0	0	0	0	0	0	0	0	0	0	0	0	0	0	0	0	0	0	0	0	0
	91		0	0	0	0	0	0	0	0	0	0	0	0	0	0	0	0	0	0	0	0	0	0	0	0	0	0	0	0	0	0	0	0	0	0	0	0	0	0	0	0	0	0	0	0	0	0	0
	92		0	0	0	0	0	0	0	0	0	0	0	0	0	0	0	0	0	0	0	0	0	0	0	0	0	0	0	0	0	0	0	0	0	0	0	0	0	0	0	0	0	0	0	0	0	0	0
	93		0	0	0	0	0	0	0	0	0	0	0	0	0	0	0	0	0	0	0	0	0	0	0	0	0	0	0	0	0	0	0	0	0	0	0	0	0	0	0	0	0	0	0	0	0	0	0
	94		0	0	0	0	0	0	0	0	0	0	0	0	0	0	0	0	0	0	0	0	0	0	0	0	0	0	0	0	0	0	0	0	0	0	0	0	0	0	0	0	0	0	0	0	0	0	0
	95		0	0	0	0	0	0	0	0	0	0	0	0	0	0	0	0	0	0	0	0	0	0	0	0	0	0	0	0	0	0	0	0	0	0	0	0	0	0	0	0	0	0	0	0	0	0	0
	96		0	0	0	0	0	0	0	0	0	0	0	0	0	0	0	0	0	0	0	0	0	0	0	0	0	0	0	0	0	0	0	0	0	0	0	0	0	0	0	0	0	0	0	0	0	0	0
	97		0	0	0	0	0	0	0	0	0	0	0	0	0	0	0	0	0	0	0	0	0	0	0	0	0	0	0	0	0	0	0	0	0	0	0	0	0	0	0	0	0	0	0	0	0	0	0
	98		0	0	0	0	0	0	0	0	0	0	0	0	0	0	0	0	0	0	0	0	0	0	0	0	0	0	0	0	0	0	0	0	0	0	0	0	0	0	0	0	0	0	0	0	0	0	0
	99		0	0	0	1	1	1	0	1	1	0	1	1	1	1	1	0	0	1	0	1	0	1	1	1	0	1	1	1	1	1	1	1	1	1	0	1	1	1	1	1	1	1	0	1	0	1	1
	100		0	0	0	1	1	1	0	1	1	1	0	1	1	0	1	0	0	1	0	1	0	1	1	0	1	1	1	1	1	1	1	1	1	1	1	0	1	1	1	1	0	1	0	0	0	1	1
	101		0	0	0	0	0	0	0	0	0	0	0	0	0	0	0	0	0	0	0	0	0	0	0	0	0	0	0	0	0	0	0	0	0	0	0	0	0	0	0	0	0	0	0	0	0	0	0
	102		0	0	0	0	0	0	0	0	0	0	0	0	1	0	0	0	0	0	0	0	0	0	0	0	0	0	0	0	0	0	0	0	0	0	0	0	0	0	0	0	0	0	0	0	0	0	0
	103		0	0	0	0	0	0	0	0	0	0	0	0	0	0	0	0	0	0	0	0	0	0	0	0	0	0	0	0	0	0	0	0	0	0	0	0	0	0	0	0	0	0	0	0	0	0	0
	104		0	0	0	0	0	0	0	0	0	0	0	0	0	0	0	0	0	0	0	0	0	0	0	0	0	0	0	0	0	0	0	0	0	0	0	0	0	0	0	0	0	0	0	0	0	0	0
	105		0	0	0	0	0	0	0	0	0	0	0	0	0	0	0	0	0	0	0	0	0	0	0	0	0	0	0	0	0	0	0	0	0	0	0	0	0	0	0	0	0	0	0	0	0	0	0
	106		0	0	0	0	0	0	0	0	0	0	0	0	0	0	0	0	0	0	0	0	0	0	0	0	0	0	0	0	0	0	0	0	0	0	0	0	0	0	0	0	0	0	0	0	0	0	0
	107		0	0	0	1	1	1	0	1	1	0	0	1	0	0	1	0	1	1	0	1	0	1	1	0	1	1	0	1	1	1	1	1	1	0	0	1	1	1	1	1	0	1	1	1	1	0	1
	108		0	0	0	1	1	1	0	0	1	0	0	1	0	0	1	0	1	1	0	2	0	2	2	0	0	2	0	1	1	1	1	0	0	0	0	1	1	2	1	2	0	1	1	1	1	0	0
	109		0	0	0	0	0	0	0	0	0	0	0	0	0	0	0	0	0	0	0	0	0	0	0	0	0	0	0	0	0	0	0	0	0	0	0	0	0	0	0	0	0	0	0	0	0	0	0
	110		0	0	0	0	0	0	0	0	0	0	0	0	0	0	0	0	0	0	0	0	0	0	0	0	0	0	0	0	0	0	0	0	0	0	0	0	0	0	0	0	0	0	0	0	0	0	0
	111		0	0	0	0	0	0	0	0	0	0	0	0	0	0	0	0	0	0	0	0	0	0	0	0	0	0	0	0	0	0	0	0	0	0	0	0	0	0	0	0	0	0	0	0	0	0	0
	112		0	0	0	0	0	0	0	0	0	0	0	0	0	0	0	0	0	0	0	0	0	0	0	0	0	0	0	0	0	0	0	0	0	0	0	0	0	0	0	0	0	0	0	0	0	0	0
	113		0	0	0	0	0	0	0	0	0	0	0	0	0	0	0	0	0	0	0	0	0	0	0	0	0	0	0	0	0	0	0	0	0	0	0	0	0	0	0	0	0	0	0	0	0	0	0
	114		0	0	0	0	0	0	0	0	0	0	0	0	0	0	0	0	0	0	0	0	0	0	0	0	0	0	0	0	0	0	0	0	0	0	0	0	0	0	0	0	0	0	0	0	0	0	0
	115		0	0	0	0	0	0	0	0	0	0	0	0	0	0	0	0	0	0	0	0	0	0	0	0	0	0	0	0	0	0	0	0	0	0	0	0	0	0	0	0	0	0	0	0	0	0	0
	116		0	0	0	0	0	0	0	0	0	0	0	0	0	0	0	0	0	0	0	0	0	0	0	0	0	0	0	0	0	0	0	0	0	0	0	0	0	0	0	0	0	0	0	0	0	0	0
	117		0	0	0	0	0	0	0	0	0	0	0	0	0	0	0	0	0	0	0	0	0	0	0	0	0	0	0	0	0	0	0	0	0	0	0	0	0	0	0	0	0	0	0	0	0	0	0
	118		0	0	0	0	0	0	0	0	0	0	0	0	0	0	0	0	0	0	0	0	0	0	0	0	0	0	0	0	0	0	0	0	0	0	0	0	0	0	0	0	0	0	0	0	0	0	0
	119		0	0	0	1	1	1	0	0	1	0	0	1	0	0	2	0	1	1	0	1	0	1	1	0	0	1	0	1	1	1	1	0	0	0	0	1	1	1	1	1	0	1	1	1	1	0	1
	120		0	0	0	1	1	1	0	0	1	0	0	2	0	0	1	0	1	1	0	1	0	1	1	0	0	1	0	1	1	1	1	0	0	0	0	1	1	1	1	1	0	1	1	1	1	0	1
	121		0	0	0	1	1	1	0	1	1	0	0	0	0	0	1	0	0	1	0	1	0	1	1	0	1	1	0	1	1	1	1	1	1	0	1	1	1	1	1	1	0	1	0	0	0	0	1
	122		0	0	0	1	1	1	0	1	1	0	0	0	0	0	1	0	0	1	0	1	0	1	1	0	1	1	0	1	1	1	1	1	1	0	1	1	1	1	1	1	0	1	0	0	0	0	1
	123		0	0	0	0	1	1	0	1	1	0	1	1	0	0	1	0	0	1	0	1	0	1	1	0	0	1	0	1	1	1	1	1	1	0	0	1	1	1	1	1	0	1	0	1	0	0	1
	124		0	0	0	1	1	1	0	0	1	0	0	1	0	0	1	0	1	1	0	1	0	1	1	0	0	1	0	1	1	1	1	0	0	0	0	1	1	1	1	1	0	1	1	1	1	0	1
	125		0	0	0	1	1	1	0	0	1	0	0	1	0	0	1	0	1	1	0	1	0	1	1	0	0	1	0	1	1	1	1	0	0	0	0	1	1	1	1	1	0	1	1	1	1	0	0
	126		0	0	0	1	1	1	0	0	1	0	0	1	0	0	1	0	1	1	0	1	0	1	1	0	0	1	0	1	1	1	1	0	0	0	0	1	1	1	1	1	0	1	1	1	1	0	0
	127		0	0	0	0	0	0	0	0	0	0	0	0	0	0	0	0	0	0	0	0	0	0	0	0	0	0	0	0	0	0	0	0	0	0	0	0	0	0	0	0	0	0	0	0	0	0	0
	128		0	0	0	0	0	0	0	0	0	0	0	0	0	0	0	0	0	0	0	0	0	0	0	0	0	0	0	0	0	0	0	0	0	0	0	0	0	0	0	0	0	0	0	0	0	0	0
	129		0	0	0	1	1	1	0	0	1	0	0	1	0	0	1	0	1	1	0	1	0	1	1	0	0	1	0	1	1	1	1	0	0	0	0	1	1	1	1	1	0	1	1	1	1	0	0
	130		0	0	0	1	1	1	0	0	1	0	0	0	0	0	2	0	1	1	0	1	0	1	1	0	0	1	0	1	1	1	1	0	0	0	0	1	1	1	1	1	0	1	1	1	1	0	0
	131		0	0	0	0	0	0	0	0	0	0	0	0	0	0	0	0	0	0	0	0	0	0	0	0	0	0	0	0	0	0	0	0	0	0	0	0	0	0	0	0	0	0	0	0	0	0	0
	132		0	0	0	0	0	0	0	0	0	0	0	0	0	0	0	0	0	0	0	0	0	0	0	0	0	0	0	0	0	0	0	0	0	0	0	0	0	0	0	0	0	0	0	0	0	0	0
	133		0	0	0	0	0	0	0	0	0	0	0	0	0	0	0	0	0	0	0	0	0	0	0	0	0	0	0	0	0	0	0	0	0	0	0	0	0	0	0	0	0	0	0	0	0	0	0
	134		0	0	0	0	0	0	0	0	0	0	0	0	0	0	0	0	0	0	0	0	0	0	0	0	0	0	0	0	0	0	0	0	0	0	0	0	0	0	0	0	0	0	0	0	0	0	0
	135		0	0	0	0	0	0	0	0	0	0	0	0	0	0	0	0	0	0	0	0	0	0	0	0	0	0	0	0	0	0	0	0	0	0	0	0	0	0	0	0	0	0	0	0	0	0	0
	136		0	0	0	0	0	0	0	0	0	0	0	0	0	0	0	0	0	0	0	0	0	0	0	0	0	0	0	0	0	0	0	0	0	0	0	0	0	0	0	0	0	0	0	0	0	0	0
	137		0	0	0	1	1	1	0	0	1	0	0	1	0	0	1	0	1	1	0	1	0	1	1	0	0	0	0	1	1	1	1	0	0	0	0	1	1	1	1	1	0	1	1	1	1	0	0
	138		0	0	0	0	0	0	0	0	0	0	0	0	0	0	0	0	0	0	0	0	0	0	0	0	0	0	0	0	0	0	0	0	0	0	0	0	0	0	0	0	0	0	0	0	0	0	0
	139		0	0	0	1	1	1	0	0	1	0	0	1	0	0	1	0	0	1	0	1	0	1	1	0	0	1	1	1	1	1	1	0	0	0	0	1	1	1	1	1	0	1	0	0	0	1	1
	140		0	0	0	1	1	1	0	0	1	0	0	0	0	0	1	0	1	1	0	1	0	1	1	0	0	1	0	1	1	1	1	0	0	0	0	1	1	1	1	1	0	1	1	1	1	0	0
	141		0	0	0	1	1	1	0	0	1	0	0	0	0	0	1	0	1	1	0	1	0	1	1	0	0	1	0	1	1	1	1	0	0	0	0	1	1	1	1	1	0	1	1	1	1	0	0
	142		0	0	0	0	0	0	0	0	0	0	0	0	0	0	0	0	0	0	0	0	0	0	0	0	0	0	0	0	0	0	0	0	0	0	0	0	0	0	0	0	0	0	0	0	0	0	0
	143		0	0	0	1	1	1	0	0	1	0	0	1	0	0	1	0	1	1	0	1	0	1	1	0	0	1	0	1	1	1	1	0	0	0	0	1	1	1	1	1	0	1	0	1	1	0	0
	144		0	0	0	0	0	0	0	0	0	0	0	0	0	0	0	0	0	0	0	0	0	0	0	0	0	0	0	0	0	0	0	0	0	0	0	0	0	0	0	0	0	0	0	0	0	0	0
	145		0	0	0	0	0	0	0	0	0	0	0	0	0	0	0	0	0	0	0	0	0	0	0	0	0	0	0	0	0	0	0	0	0	0	0	0	0	0	0	0	0	0	0	0	0	0	0
	146		0	0	0	1	1	1	0	0	1	0	0	0	0	0	1	0	0	1	0	1	0	1	1	0	0	1	0	1	1	1	1	0	0	0	0	1	1	1	1	1	0	1	1	1	1	0	0
	147		0	0	0	0	0	0	0	0	0	0	0	0	0	0	0	0	0	0	0	0	0	0	0	0	0	0	0	0	0	0	0	0	0	0	0	0	0	0	0	0	0	0	0	0	0	0	0
	148		0	0	0	1	1	1	0	0	1	1	0	0	0	0	1	0	0	1	0	1	0	1	1	0	1	1	0	1	1	1	1	0	0	0	1	0	1	1	1	1	0	1	0	0	0	0	1
	149		0	0	0	0	0	0	0	0	0	1	1	0	0	0	0	0	1	0	0	0	0	0	0	0	1	0	0	0	0	0	1	0	0	0	0	0	0	0	0	1	0	0	1	1	1	0	0
	150		0	0	0	0	0	0	0	0	0	0	0	0	0	0	0	0	0	0	0	0	0	0	0	0	0	0	0	0	0	0	0	0	0	0	0	0	0	0	0	0	0	0	0	0	0	0	0
	151		0	0	0	1	1	1	0	0	1	0	0	0	0	0	1	0	0	1	0	1	0	1	1	0	0	1	0	1	1	1	1	0	0	0	0	1	1	1	1	1	0	1	0	0	0	0	1
	152		0	0	0	0	0	0	0	0	0	0	0	0	0	0	0	0	0	0	0	0	0	0	0	0	0	0	0	0	0	0	0	0	0	0	0	0	0	0	0	0	0	0	0	0	0	0	0
	153		0	0	0	0	0	0	0	0	0	0	0	0	0	0	0	0	0	0	0	0	0	0	0	0	0	0	0	0	0	0	0	0	0	0	0	0	0	0	0	0	0	0	0	0	0	0	0
	154		0	0	0	0	0	0	0	0	0	0	0	0	0	0	0	0	0	0	0	0	0	0	0	0	0	0	0	0	0	0	0	0	0	0	0	0	0	0	0	0	0	0	0	0	0	0	0
	155		0	0	0	1	1	1	0	0	1	0	0	0	0	0	1	0	0	1	0	1	0	1	1	0	0	1	0	1	1	1	1	0	0	0	0	1	1	1	1	1	0	1	0	0	0	0	0
	156		0	0	0	1	1	1	0	0	1	0	0	0	0	0	1	0	0	0	0	1	0	1	1	0	0	0	0	1	1	1	1	0	0	0	0	1	1	1	1	1	0	1	1	1	0	0	0
	157		0	0	0	1	1	1	0	0	1	0	0	0	0	0	1	0	0	1	0	1	0	1	1	0	0	1	0	1	1	1	1	0	0	0	0	1	1	1	2	0	0	1	0	0	0	0	0
	158		0	0	0	1	1	1	0	0	1	0	0	0	0	0	1	0	0	1	0	1	0	1	1	0	0	1	0	1	1	1	1	0	0	0	0	1	1	1	1	1	0	1	0	0	0	0	0
	159		0	0	0	0	1	1	0	0	1	0	0	0	0	0	1	0	0	1	0	1	0	1	1	0	0	1	0	1	1	1	1	0	0	0	0	1	1	1	1	1	0	1	0	0	0	0	0
	160		0	0	0	1	1	1	0	0	1	0	0	0	0	0	1	0	0	1	0	1	0	1	1	0	0	1	0	1	1	1	1	0	0	0	0	0	1	1	1	1	0	1	0	0	0	0	0
	161		0	0	0	1	1	0	0	0	1	0	0	0	0	0	1	0	0	1	0	1	0	1	1	0	0	1	0	1	1	1	1	0	0	0	0	1	1	1	1	1	0	1	0	0	0	0	0
	162		0	0	0	0	0	0	0	0	0	0	0	0	0	0	0	0	0	0	0	0	0	0	0	0	0	0	0	0	0	0	0	0	0	0	0	0	0	0	0	0	0	0	0	0	0	0	0
	163		0	0	0	0	0	0	0	1	0	1	1	1	0	0	0	1	1	0	1	0	1	0	0	0	0	0	0	0	0	0	0	1	1	1	0	0	0	0	1	1	0	0	1	1	1	1	1
	164		0	0	0	0	0	0	1	1	0	1	1	0	1	1	0	1	1	0	1	0	0	0	0	1	0	0	0	0	0	0	0	1	1	1	0	0	0	0	0	0	1	0	1	1	1	0	0
	165		0	0	0	1	1	1	0	0	1	0	0	0	0	0	0	0	1	1	0	0	0	0	0	0	0	0	0	1	1	1	1	0	0	0	0	1	1	0	1	1	0	1	1	0	1	0	0
	166		0	0	0	0	0	0	0	0	0	0	0	0	0	0	0	0	0	0	0	0	0	0	0	0	0	0	0	0	0	0	0	0	0	0	0	0	0	0	0	0	0	0	0	0	0	0	0
	167		0	0	0	0	0	0	0	0	0	0	0	0	0	0	0	0	0	0	0	0	0	0	0	0	0	0	0	0	0	0	0	0	0	0	0	0	0	0	0	0	0	0	0	0	0	0	0
	168		0	0	0	0	0	0	1	1	0	1	1	0	1	1	0	1	1	0	1	0	0	0	0	1	0	0	0	0	0	0	0	1	1	1	0	0	0	0	0	0	1	0	1	1	1	0	0
	169		0	0	0	0	1	1	0	1	1	0	1	0	1	0	1	0	0	0	0	0	0	0	1	0	0	0	0	0	0	1	0	1	1	0	0	1	1	0	0	1	0	1	0	1	0	0	1
	170		0	1	0	0	0	0	0	0	0	0	0	0	0	0	0	0	0	0	0	0	0	0	0	0	0	0	0	0	0	0	0	0	0	0	0	0	0	0	0	0	0	0	0	0	0	0	0
	171		0	0	0	0	0	0	0	0	0	0	0	0	0	0	0	0	0	0	0	0	0	0	0	0	0	0	0	0	0	0	0	0	0	0	0	0	0	0	0	0	0	0	0	0	0	0	0
	172		0	0	0	0	1	1	0	0	1	0	0	0	0	0	0	0	0	0	0	1	0	1	1	0	0	1	0	1	1	1	1	0	0	0	0	1	1	1	1	0	0	1	0	0	0	0	0
	173		0	0	0	0	0	0	0	0	0	0	0	0	0	0	0	0	0	0	0	0	0	0	0	0	0	0	0	0	0	0	0	0	0	0	0	0	0	0	0	0	0	0	0	0	0	0	0
	174		0	0	0	1	1	0	0	0	1	0	0	0	0	0	0	0	0	1	0	0	0	0	0	0	0	0	0	1	1	1	1	0	0	0	0	1	1	0	1	0	0	1	1	1	1	0	0
	175		0	0	0	0	1	0	0	0	1	0	0	0	0	0	1	0	0	1	0	1	0	1	1	0	0	1	0	1	1	0	1	0	0	0	0	1	1	1	1	1	0	1	0	0	0	0	0
	176		0	0	0	0	0	0	0	0	0	0	0	0	0	0	0	0	0	0	0	0	0	0	0	0	0	0	0	0	0	0	0	0	0	0	0	0	0	0	0	0	0	0	0	0	0	0	0
	177		1	0	1	0	0	0	0	0	0	0	0	0	0	0	0	0	0	0	0	0	0	0	0	0	0	0	0	0	0	0	0	0	0	0	0	0	0	0	0	0	0	0	0	0	0	0	0
	178		0	0	0	0	0	0	0	1	0	1	1	0	0	1	0	1	1	0	1	0	0	0	0	1	0	0	0	0	0	0	0	1	1	1	0	0	0	0	0	0	1	0	1	1	1	0	0
	179		0	0	0	1	1	1	0	0	1	0	0	0	0	0	0	0	0	1	0	0	0	0	0	0	0	0	0	1	1	1	1	0	0	0	0	1	1	0	1	1	0	1	0	0	0	0	0
	180		0	0	0	0	0	0	0	0	0	0	0	0	0	0	0	0	0	0	0	0	0	0	0	0	0	0	0	0	0	0	0	0	0	0	0	0	0	0	0	0	0	0	0	0	0	0	0
	181		0	0	0	0	0	0	0	0	0	0	0	0	0	0	0	0	0	0	0	0	0	0	0	0	0	0	0	0	0	0	0	0	0	0	0	0	0	0	0	0	0	0	0	0	0	0	0
	182		0	0	0	0	0	0	0	0	0	0	0	0	0	0	0	0	0	0	0	0	0	0	0	0	0	0	0	0	0	0	0	0	0	0	0	0	0	0	0	0	0	0	0	0	0	0	0
	183		0	0	0	0	0	0	0	0	0	0	0	0	0	0	0	0	0	0	0	0	0	0	0	0	0	0	0	0	0	0	0	0	0	0	0	0	0	0	0	0	0	0	0	0	0	0	0
	184		0	0	0	1	1	0	0	0	1	0	0	0	0	0	0	0	0	1	0	0	0	0	0	0	0	0	0	1	1	1	1	0	0	0	0	1	1	0	1	1	0	1	0	0	0	0	0
	185		0	0	0	1	1	1	0	0	1	0	0	0	0	0	0	0	0	0	0	1	0	1	0	0	0	0	0	0	1	1	1	0	0	0	0	1	1	0	1	1	0	1	0	0	0	0	0
	186		0	0	0	1	1	1	0	0	1	0	0	0	0	0	0	0	0	0	0	0	0	0	0	0	0	0	0	1	1	1	1	0	0	0	0	0	1	0	1	1	0	1	0	0	0	0	0
	187		0	0	0	0	0	0	0	0	0	0	0	0	0	0	0	0	0	0	0	0	0	0	0	0	0	0	0	0	0	0	0	0	0	0	0	0	0	0	0	0	0	0	0	0	0	0	0
	188		0	0	0	0	0	0	0	0	0	0	0	0	0	0	0	0	0	0	0	0	0	0	0	0	0	0	0	0	0	0	0	0	0	0	0	0	0	0	0	0	0	0	0	0	0	0	0
	189		0	0	0	1	1	0	0	0	0	0	0	0	0	0	1	0	0	1	0	0	0	1	0	0	0	1	0	1	0	1	0	0	0	0	0	0	0	0	1	0	0	1	1	1	0	0	0
	190		0	0	0	0	0	0	0	0	0	0	0	0	0	0	0	0	0	0	0	0	0	0	0	0	0	0	0	0	0	0	0	0	0	0	0	0	0	0	0	0	0	0	0	0	0	0	0
	191		0	0	0	0	0	0	0	0	0	0	0	0	0	0	0	0	0	0	0	0	0	0	0	0	0	0	0	0	0	0	0	0	0	0	0	0	0	0	0	0	0	0	0	0	0	0	0
	192		0	0	0	0	0	0	0	0	0	0	0	0	0	0	0	0	0	0	0	0	0	0	0	0	0	0	0	0	0	0	0	0	0	0	0	0	0	0	0	0	0	0	0	0	0	0	0
	193		0	0	0	0	0	1	0	0	0	0	0	1	0	0	1	0	0	1	0	0	0	1	0	0	0	1	0	1	0	0	0	1	1	0	0	0	0	0	0	1	0	1	0	0	0	0	0
	194		0	0	0	0	0	0	0	0	0	1	1	0	0	1	0	1	0	0	1	0	1	0	0	1	0	0	1	0	0	0	0	0	0	1	1	0	0	0	0	0	1	0	0	0	0	1	0
	195		0	0	0	1	1	1	0	0	1	0	0	0	0	0	0	0	0	0	0	0	0	0	0	0	0	0	0	0	1	0	1	0	0	0	0	0	1	0	1	1	0	1	0	0	0	0	0
	196		0	0	0	0	0	0	0	0	0	0	0	0	0	0	0	0	0	0	0	0	0	0	0	0	0	0	0	0	0	0	0	0	0	0	0	0	0	0	0	0	0	0	0	0	0	0	0
	197		0	0	0	0	0	0	0	0	0	0	0	0	0	0	0	0	0	0	0	0	0	0	0	0	0	0	0	0	0	0	0	0	0	0	0	0	0	0	0	0	0	0	0	0	0	0	0
	198		0	0	0	0	0	0	0	0	0	0	0	0	0	0	0	0	0	0	0	0	0	0	0	0	0	0	0	0	0	0	0	0	0	0	0	0	0	0	0	0	0	0	0	0	0	0	0
	199		0	0	0	0	1	0	0	0	1	0	0	0	0	0	1	0	0	0	0	0	0	1	1	0	0	1	0	1	0	0	0	0	0	0	0	0	0	1	1	0	0	0	0	0	0	0	0
	200		0	0	0	0	1	0	0	0	0	0	0	0	0	0	1	0	0	0	0	0	0	1	1	0	0	1	0	1	0	0	0	0	0	0	0	0	0	1	1	0	0	0	0	0	0	0	0
	201		0	0	0	0	0	0	0	0	0	0	0	0	0	0	0	0	0	0	0	0	0	0	0	0	0	0	0	0	0	0	0	0	0	0	0	0	0	0	0	0	0	0	0	0	0	0	0
	202		0	0	0	1	0	1	0	0	0	0	0	0	0	0	0	0	0	1	0	1	0	0	0	0	0	0	0	0	1	1	0	0	0	0	0	0	1	0	0	0	0	1	0	0	0	0	0
	203		0	0	0	0	0	0	0	0	0	0	0	0	0	0	0	0	0	0	0	0	0	0	0	0	0	0	0	0	0	0	0	0	0	0	0	0	0	0	0	0	0	0	0	0	0	0	0
	204		0	0	0	0	0	0	0	1	0	1	0	0	0	1	0	0	0	0	0	0	0	0	0	1	0	0	0	0	0	0	0	1	1	1	0	0	0	0	0	0	1	0	0	0	0	0	0
	205		0	0	0	0	0	0	0	0	0	0	0	0	0	0	0	0	0	0	0	0	0	0	0	0	0	0	0	0	0	0	0	0	0	0	0	0	0	0	0	0	0	0	0	0	0	0	0
	206		0	0	0	0	0	0	0	0	0	1	0	0	0	0	0	1	1	0	1	0	1	0	0	0	1	0	0	0	0	0	0	0	0	0	1	0	0	0	0	0	0	0	1	0	1	0	0
	207		0	0	0	0	0	0	0	0	0	0	0	0	0	0	0	0	0	0	0	0	0	0	0	0	0	0	0	0	0	0	0	0	0	0	0	0	0	0	0	0	0	0	0	0	0	0	0
	208		0	0	0	0	0	0	0	0	0	0	1	0	0	0	0	1	1	0	1	0	1	0	0	0	0	0	0	0	0	0	0	0	0	0	0	0	0	0	0	0	0	0	1	1	1	0	0
	209		0	0	0	0	0	0	0	0	0	0	1	0	0	1	0	0	0	0	0	0	1	0	0	1	0	0	1	0	0	0	0	0	0	1	0	0	0	0	0	0	1	0	0	0	0	1	0
	210		0	0	0	0	0	0	0	0	0	0	1	0	0	1	0	0	0	0	0	0	1	0	0	1	0	0	1	0	0	0	0	0	0	1	0	0	0	0	0	0	1	0	0	0	0	1	0
	211		0	0	0	0	0	0	0	0	0	0	0	0	0	0	0	0	0	0	0	0	0	0	0	0	0	0	0	0	0	0	0	0	0	0	0	0	0	0	0	0	0	0	0	0	0	0	0
	212		0	0	0	1	0	0	0	0	1	0	0	0	0	0	0	0	0	0	0	1	0	0	0	0	0	0	0	0	1	1	0	0	0	0	0	1	0	1	0	0	0	0	0	0	0	0	0
	213		0	0	0	0	0	0	0	0	0	0	1	0	0	1	0	0	0	0	0	0	1	0	0	1	0	0	1	0	0	0	0	0	0	1	0	0	0	0	0	0	1	0	0	0	0	1	0
	214		0	0	0	0	0	0	0	0	0	0	0	0	0	0	0	0	0	0	0	0	0	0	0	0	0	0	0	0	0	0	0	0	0	0	0	0	0	0	0	0	0	0	0	0	0	0	0
	215		0	0	0	0	1	1	0	0	1	0	0	0	0	0	1	0	0	0	0	0	0	0	0	0	0	0	0	0	0	1	0	0	0	0	0	1	1	0	0	0	0	1	0	0	0	0	0
	216		0	0	0	0	0	0	0	0	0	0	0	0	0	0	0	0	0	0	0	0	0	0	0	0	0	0	0	0	0	0	0	0	0	0	0	0	0	0	0	0	0	0	0	0	0	0	0
	217		0	0	0	1	0	0	0	0	1	0	0	0	0	0	0	0	0	0	0	0	0	0	0	0	0	0	0	0	1	1	0	0	0	0	0	1	1	0	0	0	0	1	0	0	0	0	0
	218		0	0	0	0	0	0	0	0	0	0	0	0	0	0	0	0	0	0	0	0	0	0	0	0	0	0	0	0	0	0	0	0	0	0	0	0	0	0	0	0	0	0	0	0	0	0	0
	219		0	0	0	0	0	0	0	0	0	0	0	0	0	0	0	0	0	0	0	0	0	0	0	0	0	0	0	0	0	0	0	0	0	0	0	0	0	0	0	0	0	0	0	0	0	0	0
	220		0	0	0	0	0	0	0	0	0	0	1	0	0	1	0	0	0	0	0	0	1	0	0	1	0	0	1	0	0	0	0	0	0	1	0	0	0	0	0	0	1	0	0	0	0	1	0
	221		0	0	0	0	0	0	0	0	0	1	1	0	0	0	0	1	0	0	1	0	1	0	0	0	0	0	1	0	0	0	0	0	0	1	0	0	0	0	0	0	0	0	0	0	0	1	0
	222		0	0	0	0	0	0	0	0	0	0	0	0	0	0	0	0	0	0	0	0	0	0	0	0	0	0	0	0	0	0	0	0	0	0	0	0	0	0	0	0	0	0	0	0	0	0	0
	223		0	0	0	0	0	0	0	0	0	0	1	0	0	0	0	1	1	0	1	0	1	0	0	0	0	0	0	0	0	0	0	0	0	0	0	0	0	0	0	0	0	0	1	1	1	0	0
	224		0	0	0	0	0	0	0	0	0	0	0	0	0	0	0	0	0	0	0	0	0	0	0	0	0	0	0	0	0	0	0	0	0	0	0	0	0	0	0	0	0	0	0	0	0	0	0
	225		0	0	0	0	0	0	0	0	0	0	0	1	0	0	0	1	1	0	1	0	0	0	0	0	0	0	0	0	0	0	0	0	0	0	0	0	0	0	0	0	0	0	1	1	1	0	1
	226		0	0	0	0	0	0	0	0	0	0	0	0	0	0	0	0	0	0	0	0	0	0	0	0	0	0	0	0	0	0	0	0	0	0	0	0	0	0	0	0	0	0	0	0	0	0	0
	227		0	0	0	0	0	0	0	0	0	0	1	0	0	1	0	0	0	0	0	0	0	0	0	1	0	0	1	0	0	0	0	0	0	1	0	0	0	0	0	0	1	0	0	0	0	1	0
	228		0	0	0	0	0	0	0	0	0	0	1	0	0	0	0	1	1	0	1	0	0	0	0	0	0	0	0	0	0	0	0	0	0	0	0	0	0	0	0	0	0	0	1	1	1	0	0
	229		0	0	0	0	0	0	0	0	0	0	0	0	0	0	0	0	0	0	0	0	0	0	0	0	0	0	0	0	0	0	0	0	0	0	0	0	0	0	0	0	0	0	0	0	0	0	0
	230		0	0	0	1	1	0	0	0	0	0	0	0	0	0	0	0	0	1	0	0	0	0	0	0	0	0	0	0	0	1	1	0	0	0	0	0	0	0	0	0	0	0	0	0	0	0	0
	231		0	0	0	0	0	0	0	0	0	0	0	0	0	0	0	0	0	0	0	0	0	0	0	0	0	0	0	0	0	0	0	0	0	0	0	0	0	0	0	0	0	0	0	0	0	0	0
	232		0	0	0	0	0	0	0	0	0	0	0	0	0	2	0	0	0	0	1	0	0	0	0	2	0	0	0	0	0	0	0	0	0	0	0	0	0	0	0	0	2	0	0	0	0	0	0
	233		0	0	0	0	0	0	0	0	0	0	0	0	0	0	0	1	1	0	1	0	1	0	0	0	0	0	0	0	0	0	0	0	0	0	0	0	0	0	0	0	0	0	1	1	1	0	0
	234		0	0	0	0	0	0	0	0	0	0	0	0	0	0	0	0	0	0	0	0	0	0	0	0	0	0	0	0	0	0	0	0	0	0	0	0	0	0	0	0	0	0	0	0	0	0	0
	235		0	0	0	0	0	0	0	0	0	0	1	0	0	1	0	0	0	0	0	0	1	0	0	1	0	0	0	0	0	0	0	0	0	1	0	0	0	0	0	0	1	0	0	0	0	0	0
	236		0	0	0	0	0	0	0	0	0	0	0	0	0	0	1	0	0	0	0	1	0	1	1	0	0	1	0	0	0	0	0	0	0	0	0	0	0	1	0	0	0	0	0	0	0	0	0
	237		0	0	0	0	0	0	0	0	0	0	0	0	0	0	0	0	0	0	0	0	0	0	0	0	0	0	0	0	0	0	0	0	0	0	0	0	0	0	0	0	0	0	0	0	0	0	0
	238		0	0	0	0	0	0	0	0	0	0	0	0	0	0	0	0	0	0	0	0	0	0	0	0	0	0	0	0	0	0	0	0	0	0	0	0	0	0	0	0	0	0	0	0	0	0	0
	239		0	0	0	0	0	0	0	0	0	0	0	0	0	0	0	0	0	0	0	0	0	0	0	0	0	0	0	0	0	0	0	0	0	0	0	0	0	0	0	0	0	0	0	0	0	0	0
	240		0	0	0	0	0	1	0	0	0	0	0	0	0	0	0	0	1	0	0	0	0	0	0	0	0	0	0	0	0	0	0	0	0	0	0	0	0	0	0	0	0	0	1	1	1	0	0
	241		0	0	0	0	0	0	0	0	0	0	0	0	0	0	0	0	0	0	0	0	0	0	0	0	0	0	0	0	0	0	0	0	0	0	0	0	0	0	0	0	0	0	0	0	0	0	0
	242		0	1	0	0	0	0	0	1	0	1	0	0	0	0	0	0	0	0	0	0	0	0	0	0	1	0	0	0	0	0	0	0	0	0	1	0	0	0	0	0	0	0	0	0	0	0	0
	243		0	0	0	0	0	0	0	0	0	0	0	0	0	0	0	0	0	0	0	0	0	0	0	0	0	0	0	0	0	0	0	0	0	0	0	0	0	0	0	0	0	0	0	0	0	0	0
	244		0	0	0	0	0	0	0	0	0	0	0	0	0	0	0	0	0	0	0	0	0	0	0	0	0	0	0	0	0	0	0	0	0	0	0	0	0	0	0	0	0	0	0	0	0	0	0
	245		0	0	0	0	0	0	0	0	0	0	1	0	0	1	0	0	0	0	0	0	1	0	0	1	0	0	0	0	0	0	0	0	0	1	0	0	0	0	0	0	1	0	0	0	0	0	0
	246		0	0	0	0	0	0	0	0	0	0	0	0	0	0	0	1	0	0	1	0	1	0	0	0	1	0	0	0	0	0	0	1	1	0	0	0	0	0	0	0	0	0	0	0	0	0	0
	247		0	0	0	0	0	0	0	0	0	0	0	0	0	0	0	0	0	0	0	0	0	0	0	0	0	0	0	0	0	0	0	0	0	0	0	0	0	0	0	0	0	0	0	0	0	0	0
	248		0	0	0	0	0	0	0	0	0	0	0	0	0	0	0	1	1	0	1	0	0	0	0	0	0	0	0	0	0	0	0	0	0	0	0	0	0	0	0	0	0	0	1	1	1	0	0
	249		0	0	0	0	0	0	0	0	0	0	0	0	0	0	0	0	0	0	0	0	0	0	0	0	0	0	0	0	0	0	0	0	0	0	0	0	0	0	0	0	0	0	0	0	0	0	0
	250		0	0	0	0	0	0	0	0	0	0	0	0	0	0	0	0	0	0	0	0	0	0	0	0	0	0	0	0	0	0	0	0	0	0	0	0	0	0	0	0	0	0	0	0	0	0	0
	251		0	0	0	0	0	0	0	0	0	0	1	0	0	1	0	0	0	0	0	0	0	0	0	1	0	0	0	0	0	0	0	0	0	1	0	0	0	0	0	0	1	0	0	0	0	0	0
	252		0	0	0	0	0	0	0	0	0	0	0	1	0	1	0	0	0	0	0	0	0	0	0	1	0	0	0	0	0	0	0	0	0	1	0	0	0	0	0	0	1	0	0	0	0	0	0
	253		0	0	0	0	0	0	0	1	0	1	0	0	0	0	0	0	0	0	0	0	0	0	0	0	0	0	0	0	0	0	0	1	1	0	0	0	0	0	0	0	0	0	0	0	0	0	0
	254		0	0	0	0	0	0	0	0	0	1	1	0	0	0	0	0	0	0	0	0	1	0	0	0	0	0	0	0	0	0	0	0	0	1	0	0	0	0	0	0	0	0	0	0	0	0	1
	255		0	0	0	0	0	0	0	0	0	0	0	0	0	0	0	0	0	0	0	0	0	0	0	0	0	0	0	0	0	0	0	0	0	0	0	0	0	0	0	0	0	0	0	0	0	0	0
	256		0	0	0	0	0	0	0	0	0	0	0	0	0	0	0	0	0	0	0	0	0	0	0	0	0	0	0	0	0	0	0	0	0	0	0	0	0	0	0	0	0	0	0	0	0	0	0
	257		0	0	0	0	0	0	0	0	0	0	0	0	0	0	1	0	0	0	0	1	0	0	1	0	0	1	0	0	0	0	0	0	0	0	0	0	0	1	0	0	0	0	0	0	0	0	0
	258		0	0	0	0	0	0	0	0	0	0	0	0	0	1	0	0	1	0	0	0	0	0	0	1	0	0	1	0	0	0	0	0	0	0	0	0	0	0	0	0	1	0	0	0	0	0	0
	259		0	0	0	0	0	0	0	1	0	0	0	0	0	0	0	0	0	0	0	0	0	0	0	0	1	0	0	0	0	0	0	1	1	0	0	0	0	0	0	0	0	0	0	0	0	0	0
	260		0	0	0	0	0	0	0	1	0	0	0	0	0	0	0	0	0	0	0	0	0	0	0	0	1	0	0	0	0	0	0	1	1	0	0	0	0	0	0	0	0	0	0	0	0	0	0
	261		0	0	0	0	1	1	0	0	0	0	0	0	0	0	0	0	0	1	0	0	0	0	0	0	0	0	0	0	0	0	1	0	0	0	0	0	0	0	1	0	0	0	0	0	0	0	0
	262		0	0	0	0	0	0	0	0	0	0	0	0	0	0	0	1	1	0	1	0	0	0	0	0	0	0	0	0	0	0	0	0	0	0	0	0	0	0	0	0	0	0	1	0	1	0	0
	263		0	0	0	0	0	0	0	0	0	0	0	0	0	0	0	0	0	0	0	0	0	0	0	0	0	0	0	0	0	0	0	0	0	0	0	0	0	0	0	0	0	0	0	0	0	0	0
	264		0	0	0	0	0	0	0	0	0	0	0	0	0	0	0	0	0	0	0	0	0	0	0	0	0	0	0	0	0	0	0	0	0	0	0	0	0	0	0	0	0	0	0	0	0	0	0
	265		0	0	0	0	0	0	0	1	0	0	0	0	0	0	0	0	0	0	0	0	0	0	0	0	1	0	0	0	0	0	0	1	1	0	0	0	0	0	0	0	0	0	0	0	0	0	0
	266		2	2	1	0	0	0	0	0	0	0	0	0	0	0	0	0	0	0	0	0	0	0	0	0	0	0	0	0	0	0	0	0	0	0	0	0	0	0	0	0	0	0	0	0	0	0	0
	267		0	0	0	0	0	0	0	0	0	0	0	0	0	0	0	0	0	0	0	0	0	0	0	0	0	0	0	0	0	0	0	0	0	0	0	0	0	0	0	0	0	0	0	0	0	0	0
	268		0	0	0	0	0	0	0	0	0	0	0	0	0	0	0	0	0	0	0	0	0	0	0	0	0	0	0	0	0	0	0	0	0	0	0	0	0	0	0	0	0	0	0	0	0	0	0
	269		0	0	0	0	0	0	0	0	0	0	0	0	0	0	0	0	0	0	0	0	0	0	0	0	0	0	0	0	0	0	0	0	0	0	0	0	0	0	0	0	0	0	0	0	0	0	0
	270		1	1	1	0	0	0	0	0	0	0	0	0	0	0	0	0	0	0	1	0	0	0	0	0	0	0	0	0	0	0	0	0	0	0	0	0	0	0	0	0	0	0	0	0	0	0	0
	271		0	0	0	0	0	0	0	0	0	0	0	0	0	0	0	0	0	0	0	0	0	0	0	0	0	0	0	0	0	0	0	0	0	0	0	0	0	0	0	0	0	0	0	0	0	0	0
	272		0	0	0	0	0	0	0	0	0	0	0	0	0	0	0	0	0	0	0	0	0	0	0	0	0	0	0	0	0	0	0	0	0	0	0	0	0	0	0	0	0	0	0	0	0	0	0
	273		0	0	0	0	0	0	0	1	0	0	0	0	0	0	0	0	0	0	0	0	0	0	0	0	1	0	0	0	0	0	0	1	1	0	0	0	0	0	0	0	0	0	0	0	0	0	0
	274		0	0	0	0	0	0	0	1	0	0	0	0	0	0	0	0	0	0	0	0	0	0	0	0	1	0	0	0	0	0	0	1	1	0	0	0	0	0	0	0	0	0	0	0	0	0	0
	275		0	0	0	0	0	0	0	0	0	0	0	0	0	0	0	1	1	0	1	0	1	0	0	0	0	0	0	0	0	0	0	0	0	0	0	0	0	0	0	0	0	0	0	0	1	0	0
	276		0	0	0	0	0	0	0	0	0	0	0	0	0	0	0	0	0	0	0	0	0	0	0	0	0	0	0	0	0	0	0	0	0	0	0	0	0	0	0	0	0	0	0	0	0	0	0
	277		0	0	0	0	0	0	0	0	0	1	0	0	0	0	0	0	1	0	0	0	1	0	0	0	0	0	0	0	0	0	0	0	0	0	0	0	0	0	0	0	0	0	1	0	1	0	0
	278		0	0	0	0	0	0	0	1	0	0	0	0	0	0	0	0	0	0	0	0	0	0	0	0	1	0	0	0	0	0	0	1	1	0	0	0	0	0	0	0	0	0	0	0	0	0	0
	279		0	0	0	0	0	0	0	0	0	0	0	0	0	0	0	0	0	0	0	0	0	0	0	0	0	0	0	0	0	0	0	0	0	0	0	0	0	0	0	0	0	0	0	0	0	0	0
	280		0	0	0	0	0	0	0	1	0	0	0	0	0	0	0	0	0	0	0	0	0	0	0	0	0	0	0	0	0	0	0	1	1	0	0	0	0	0	0	0	0	0	0	0	0	0	0
	281		0	0	0	0	0	0	0	0	0	0	0	0	0	0	0	0	0	0	0	0	0	0	0	0	0	0	0	0	0	0	0	0	0	0	0	0	0	0	0	0	0	0	0	0	0	0	0
	282		0	0	0	0	0	0	0	0	1	0	0	0	0	0	1	0	0	0	0	0	0	0	0	0	0	0	0	0	0	0	0	0	0	0	0	1	1	0	0	0	0	0	0	0	0	0	0
	283		0	0	0	0	0	0	0	0	0	0	0	0	0	0	0	0	0	0	0	0	0	0	0	0	0	0	0	0	0	0	0	0	0	0	0	0	0	0	0	0	0	0	0	0	0	0	0
	284		0	0	0	1	0	0	0	0	0	0	0	0	0	0	0	0	0	0	0	0	0	0	0	0	0	0	0	0	0	1	0	0	0	0	0	0	0	0	0	0	0	0	0	0	0	0	0
	285		0	0	0	0	0	0	0	0	0	0	0	0	0	1	0	0	0	0	0	0	0	0	0	1	0	0	0	0	0	0	0	0	0	0	0	0	1	0	0	0	1	0	0	0	0	0	0
	286		0	0	0	0	0	0	0	0	0	0	0	0	0	1	0	0	0	0	0	0	0	0	0	1	0	0	0	0	0	0	0	0	0	1	0	0	0	0	0	0	1	0	0	0	0	0	0
	287		0	0	0	0	0	0	0	0	0	1	1	0	0	0	0	0	0	0	0	0	1	0	0	0	0	0	0	0	0	0	0	0	0	1	0	0	0	0	0	0	0	0	0	0	0	0	0
	288		0	0	0	0	0	0	0	0	0	0	0	0	0	0	0	0	1	0	0	0	0	0	0	0	0	0	0	0	0	0	0	0	0	0	0	0	0	0	0	0	0	0	1	1	1	0	0
	289		0	0	0	0	0	0	0	0	0	0	0	0	0	0	0	0	0	0	0	0	0	0	0	0	0	0	0	0	0	0	0	0	0	0	0	0	0	0	0	0	0	0	0	0	0	0	0
	290		0	0	0	0	0	0	0	0	0	0	0	0	0	0	0	0	0	0	0	0	0	0	0	0	0	0	0	0	0	0	0	0	0	0	0	0	0	0	0	0	0	0	0	0	0	0	0
	291		0	0	0	0	0	0	0	0	0	0	0	0	0	0	0	0	0	0	0	0	0	0	0	0	0	0	0	0	0	0	0	0	0	0	0	0	0	0	0	0	0	0	0	0	0	0	0
	292		0	0	0	0	0	0	0	0	0	0	0	0	0	0	0	0	1	1	0	0	0	0	0	0	0	1	0	0	0	0	0	0	0	0	0	0	0	0	0	0	0	0	0	0	1	0	0
	293		0	0	0	0	0	0	0	1	0	0	0	0	0	0	0	0	0	0	0	0	0	0	0	0	1	0	0	0	0	0	0	1	1	0	0	0	0	0	0	0	0	0	0	0	0	0	0
	294		0	0	0	0	0	0	0	0	0	0	1	0	0	0	0	0	0	0	0	0	0	0	0	0	0	0	0	0	0	0	0	0	0	1	0	0	0	0	0	0	0	0	0	0	0	0	2
	295		0	0	0	0	0	0	0	0	0	0	0	0	0	0	0	0	0	0	0	0	0	0	0	0	0	0	0	0	0	0	0	0	0	0	0	0	0	0	0	0	0	0	0	0	0	0	0
	296		0	0	0	0	0	0	0	0	0	0	0	0	0	0	0	0	0	0	0	0	0	0	0	0	0	0	0	0	0	0	0	0	0	0	0	0	0	0	0	0	0	0	0	0	0	0	0
	297		0	0	0	0	0	0	0	0	0	0	0	0	0	0	0	0	1	0	0	0	0	0	0	0	0	0	0	0	0	0	0	0	0	0	0	0	0	0	0	0	0	0	1	1	1	0	0
	298		0	0	0	0	0	0	0	0	0	0	0	0	0	0	0	0	0	0	0	0	0	0	0	0	0	0	0	0	0	0	0	0	0	0	0	0	0	0	0	0	0	0	0	0	0	0	0
	299		0	0	0	0	0	0	0	0	0	1	0	0	0	0	0	1	0	0	1	0	0	0	0	0	0	0	0	0	0	0	0	0	0	0	1	0	0	0	0	0	0	0	0	0	0	0	0
	300		0	0	0	0	0	0	0	1	0	0	0	0	0	0	0	0	0	0	0	0	0	0	0	0	1	0	0	0	0	0	0	1	1	0	0	0	0	0	0	0	0	0	0	0	0	0	0
	301		0	0	0	0	0	0	0	0	0	0	0	0	0	0	0	0	0	0	0	0	0	0	0	0	0	0	0	0	0	0	0	0	0	0	0	0	0	0	0	0	0	0	0	0	0	0	0
	302		0	0	0	0	0	0	0	1	0	0	0	0	0	0	0	0	0	0	0	0	0	0	0	0	0	0	0	0	0	0	0	1	1	0	0	0	0	0	0	0	0	0	0	0	0	0	0
	303		0	0	0	0	1	1	0	0	0	0	0	0	0	0	0	0	0	0	0	0	0	0	0	0	0	0	0	0	0	0	1	0	0	0	0	0	0	0	1	0	0	0	0	0	0	0	0
	304		0	0	0	0	0	0	0	0	0	0	0	0	0	0	0	0	1	0	0	0	0	0	0	0	0	0	0	0	0	0	0	0	0	0	0	0	0	0	0	0	0	0	1	1	1	0	0
	305		0	0	0	0	0	0	0	0	0	0	1	0	0	0	0	0	0	0	0	0	0	0	0	0	0	0	1	0	0	0	0	0	0	0	0	0	0	0	0	0	0	0	0	1	0	1	0
	306		0	0	0	0	0	0	0	1	0	0	0	0	0	0	0	0	0	0	0	0	0	0	0	0	1	0	0	0	0	0	0	1	1	0	0	0	0	0	0	0	0	0	0	0	0	0	0
	307		0	0	0	0	0	0	0	0	0	0	0	0	0	1	0	0	0	0	0	0	0	0	0	1	0	0	0	0	0	0	0	0	0	1	0	0	0	0	0	0	1	0	0	0	0	0	0
	308		0	1	0	0	0	0	0	0	0	1	0	0	0	0	0	0	1	0	0	0	0	0	0	0	0	0	0	0	0	0	0	0	0	0	1	0	0	0	0	0	0	0	0	0	0	0	0
	309		1	1	1	0	0	0	0	0	0	0	0	0	0	0	0	0	0	0	0	0	0	0	0	0	0	0	0	0	0	0	0	0	0	0	0	0	0	0	0	0	0	0	0	0	0	0	0
	310		0	0	0	0	0	0	0	0	0	0	0	0	0	0	0	0	0	0	0	0	0	0	0	0	0	0	0	0	0	0	0	0	0	0	0	0	0	0	0	0	0	0	0	0	0	0	0
	311		0	0	0	0	1	0	0	0	0	0	0	0	0	0	0	0	0	0	0	0	0	0	0	0	0	0	0	0	0	0	1	0	0	0	0	0	0	0	1	0	0	0	0	0	0	0	0
	312		0	0	0	0	0	0	0	0	0	0	0	0	0	1	0	0	0	0	0	0	0	0	0	1	0	0	0	0	0	0	0	0	0	0	0	0	0	0	0	0	1	0	0	0	0	0	0
	313		0	0	0	0	0	0	1	0	0	0	0	0	1	0	0	0	0	0	0	0	0	0	0	0	0	0	0	0	0	0	0	0	0	0	0	0	0	0	0	0	0	0	0	0	0	0	0
	314		0	0	0	0	0	0	0	0	0	0	0	0	0	1	0	0	0	0	0	0	0	0	0	1	0	0	0	0	0	0	0	0	0	0	0	0	0	0	0	0	1	0	0	0	0	0	0
	315		0	0	0	0	0	0	0	0	0	0	0	0	0	0	0	0	0	0	0	0	0	0	0	0	0	0	0	0	0	0	0	0	0	0	0	0	0	0	0	0	0	0	0	0	0	0	0
	316		0	0	0	0	0	0	0	0	0	0	0	0	0	0	0	0	0	0	0	0	0	0	0	0	0	0	0	0	0	0	0	0	0	0	0	0	0	0	0	0	0	0	0	0	0	0	0
	317		0	0	0	0	0	0	0	0	0	0	0	0	0	0	0	0	1	0	0	0	0	0	0	0	0	0	0	0	0	0	0	0	0	0	0	0	0	0	0	0	0	0	1	0	1	0	0
	318		0	0	0	0	0	0	0	0	0	0	0	0	0	0	0	0	0	0	0	0	0	0	0	0	0	0	0	0	0	0	0	0	0	0	0	0	0	0	0	0	0	0	0	0	0	0	0
	319		1	1	1	0	0	0	0	0	0	0	0	0	0	0	0	0	0	0	0	0	0	0	0	0	0	0	0	0	0	0	0	0	0	0	0	0	0	0	0	0	0	0	0	0	0	0	0
	320		0	0	0	0	0	0	0	0	0	0	0	0	0	0	0	0	0	0	0	0	0	0	0	0	0	0	0	0	0	0	0	0	0	0	0	0	0	0	0	0	0	0	0	0	0	0	0
	321		0	0	0	0	0	0	0	0	0	0	0	0	0	0	0	0	0	0	0	0	0	0	0	0	0	0	0	0	0	0	0	0	0	0	0	0	0	0	0	0	0	0	0	0	0	0	0
	322		1	1	1	0	0	0	0	0	0	0	0	0	0	0	0	0	0	0	0	0	0	0	0	0	0	0	0	0	0	0	0	0	0	0	0	0	0	0	0	0	0	0	0	0	0	0	0
	323		0	0	0	0	0	0	0	0	0	0	1	0	0	0	0	0	0	0	0	0	0	0	0	0	0	0	0	0	0	0	0	0	0	1	0	0	0	0	0	0	0	0	0	0	0	0	0
	324		0	0	0	0	0	0	1	0	0	0	0	0	1	0	0	0	0	0	0	0	0	0	0	0	0	0	0	0	0	0	0	0	0	0	0	0	0	0	0	0	0	0	0	0	0	0	0
	325		0	0	0	0	0	0	0	0	0	0	0	0	0	0	0	0	0	0	0	0	0	0	0	0	0	0	0	0	0	0	0	0	0	0	0	0	0	0	0	0	0	0	0	0	0	0	0
	326		0	0	0	0	0	0	0	0	0	0	0	1	0	0	0	0	0	0	0	0	0	0	0	0	0	0	1	0	0	0	0	0	0	0	0	0	0	0	0	0	0	0	0	0	0	1	0
	327		0	0	0	0	0	0	0	0	0	1	0	1	0	0	0	0	0	0	0	0	0	0	0	0	0	0	0	0	0	0	0	0	0	0	1	0	0	0	0	0	0	0	0	0	0	0	0
	328		0	0	0	0	0	0	0	0	0	0	0	0	0	1	0	0	0	0	0	0	0	0	0	1	0	0	0	0	0	0	0	0	0	0	0	0	0	0	0	0	1	0	0	0	0	0	0
	329		0	0	0	0	0	0	1	0	0	0	0	0	1	0	0	0	0	0	0	0	0	0	0	0	0	0	0	0	0	0	0	0	0	0	0	0	0	0	0	0	0	0	0	0	0	0	0
	330		0	0	0	0	0	0	0	0	0	0	0	0	0	1	0	0	0	0	0	0	0	0	0	1	0	0	0	0	0	0	0	0	0	0	0	0	0	0	0	0	1	0	0	0	0	0	0
	331		0	0	0	0	0	0	0	0	0	0	0	0	0	0	0	1	0	0	1	0	0	0	0	0	0	0	0	0	0	0	0	0	0	0	1	0	0	0	0	0	0	0	0	0	0	0	0
	332		0	0	0	0	0	0	0	0	0	0	0	0	0	1	0	0	0	0	0	0	0	0	0	1	0	0	0	0	0	0	0	0	0	0	0	0	0	0	0	0	1	0	0	0	0	0	0
	333		0	0	0	0	0	0	0	0	0	0	0	0	0	0	0	0	0	0	0	0	0	0	0	0	0	0	0	0	0	0	0	0	0	0	0	0	0	0	0	0	0	0	0	0	0	0	0
	334		0	0	0	1	0	0	0	0	0	0	0	0	0	0	0	0	0	0	0	1	0	0	0	0	0	0	0	0	1	0	0	0	0	0	0	0	0	0	0	0	0	0	0	0	0	0	0
	335		0	0	0	0	0	0	0	0	0	0	0	0	0	0	0	1	0	0	1	0	0	0	0	0	0	0	0	0	0	0	0	0	0	0	1	0	0	0	0	0	0	0	0	0	0	0	0
	336		0	0	0	0	0	0	0	1	0	0	0	0	0	0	0	0	0	0	0	0	0	0	0	0	1	0	0	0	0	0	0	0	0	0	0	0	0	0	0	0	0	0	0	0	0	0	0
	337		0	0	0	0	0	0	0	0	0	0	0	0	0	0	0	0	0	0	0	0	0	0	0	0	1	0	0	0	0	0	0	1	1	0	0	0	0	0	0	0	0	0	0	0	0	0	0
	338		0	0	0	0	0	0	0	0	0	0	0	0	0	0	0	0	0	1	0	0	0	0	0	0	0	1	0	0	0	0	0	0	0	0	0	0	0	0	0	0	0	0	0	0	1	0	0
	339		0	0	0	0	0	0	0	0	0	0	0	0	0	1	0	0	0	0	0	0	0	0	0	1	0	0	0	0	0	0	0	0	0	0	0	0	0	0	0	0	1	0	0	0	0	0	0
	340		0	0	0	0	0	0	1	0	0	0	0	0	1	0	0	0	0	0	0	0	0	0	0	0	0	0	0	0	0	0	0	0	0	0	0	0	0	0	0	0	0	0	0	0	0	0	0
	341		0	0	0	0	0	0	0	0	0	0	0	0	0	1	0	0	0	0	0	0	0	0	0	1	0	0	0	0	0	0	0	0	0	0	0	0	0	0	0	0	1	0	0	0	0	0	0
	342		0	0	0	0	0	0	0	0	0	0	0	1	0	1	0	0	0	0	0	0	0	0	0	1	0	0	0	0	0	0	0	0	0	0	0	0	0	0	0	0	0	0	0	0	0	0	0
	343		0	0	0	0	0	1	0	0	0	0	0	0	0	0	0	0	0	0	0	0	0	0	0	0	0	1	0	1	0	0	0	0	0	0	0	0	0	0	0	0	0	0	0	0	0	0	0
	344		0	0	0	0	0	0	0	0	0	0	0	0	0	0	1	0	0	0	0	0	0	0	1	0	0	0	0	0	0	0	0	0	0	0	0	0	1	0	0	0	0	0	0	0	0	0	0
	345		0	0	0	0	0	0	0	0	0	0	0	0	0	0	0	1	1	0	0	0	0	0	0	0	1	0	0	0	0	0	0	0	0	0	0	0	0	0	0	0	0	0	0	0	0	0	0
	346		0	0	0	0	0	0	0	0	0	0	0	0	0	0	0	0	0	0	0	0	0	0	0	0	0	0	0	0	0	0	0	0	0	0	0	0	0	0	0	0	0	0	1	1	1	0	0
	347		0	0	0	0	0	0	0	0	0	0	0	0	0	1	0	0	0	0	0	0	0	0	0	1	0	0	0	0	0	0	0	0	0	0	0	0	0	0	0	0	1	0	0	0	0	0	0
	348		0	0	0	0	1	0	0	0	0	0	0	0	0	0	0	0	0	0	0	0	0	0	0	0	0	0	0	0	0	0	1	0	0	0	0	0	0	0	1	0	0	0	0	0	0	0	0
	349		0	0	0	0	0	0	0	0	1	0	0	0	0	0	0	0	0	0	0	0	0	0	0	0	0	0	0	0	0	1	0	0	0	0	0	1	0	0	0	0	0	0	0	0	0	0	0
	350		0	0	0	0	0	0	0	0	0	0	0	0	0	0	0	0	0	0	0	0	0	0	0	0	0	0	0	0	0	0	0	0	0	0	0	0	0	0	0	0	0	0	0	0	0	0	0
	351		0	0	0	0	0	0	0	0	0	0	0	0	0	0	0	0	0	0	0	0	0	0	0	0	0	0	0	0	0	0	0	0	0	0	0	0	0	0	0	0	0	0	1	1	1	0	0
	352		0	0	0	0	0	0	0	0	0	1	0	0	0	0	0	0	0	0	0	0	0	0	0	0	0	0	0	0	0	0	0	1	1	0	0	0	0	0	0	0	0	0	0	0	0	0	0
	353		1	1	1	0	0	0	0	0	0	0	0	0	0	0	0	0	0	0	0	0	0	0	0	0	0	0	0	0	0	0	0	0	0	0	0	0	0	0	0	0	0	0	0	0	0	0	0
	354		0	0	0	0	0	0	0	0	0	0	0	0	0	0	0	0	0	0	0	0	0	0	0	0	0	0	0	0	0	0	0	0	0	0	0	0	0	0	0	0	0	0	0	0	0	0	0
	355		0	0	0	0	0	0	0	0	0	0	0	0	0	0	0	0	0	0	0	0	0	0	0	0	0	0	0	0	0	0	0	0	0	0	0	0	0	0	0	0	0	0	0	0	0	0	0
	356		0	0	0	0	0	0	0	0	0	0	0	0	0	1	0	0	0	0	0	0	0	0	0	1	0	0	0	0	0	0	0	0	0	0	0	0	0	0	0	0	1	0	0	0	0	0	0
	357		0	0	0	0	0	0	0	0	0	0	0	0	0	1	0	0	0	0	0	0	0	0	0	1	0	0	0	0	0	0	0	0	0	0	0	0	0	0	0	0	1	0	0	0	0	0	0
	358		0	0	0	0	0	0	0	0	0	0	0	0	0	0	0	0	1	0	0	0	0	0	0	0	0	0	0	0	0	0	0	0	0	0	0	0	0	0	0	0	0	0	1	0	1	0	0
	359		0	0	0	0	0	0	0	0	0	0	0	0	0	0	0	1	0	0	1	0	0	0	0	0	0	0	0	0	0	0	0	0	0	0	1	0	0	0	0	0	0	0	0	0	0	0	0
	360		0	0	0	0	0	0	0	0	0	0	0	0	0	0	0	0	0	0	0	0	0	0	0	0	0	0	0	0	0	0	0	0	0	0	0	0	0	0	0	0	0	0	0	0	0	0	0
	361		0	0	0	0	0	0	0	0	0	0	0	0	0	0	0	0	0	0	0	0	0	0	0	0	1	0	0	0	0	0	0	1	1	0	0	0	0	0	0	0	0	0	0	0	0	0	0
	362		0	0	0	0	0	0	0	0	0	0	0	0	0	0	0	1	0	0	1	0	0	0	0	0	0	0	0	0	0	0	0	0	0	0	1	0	0	0	0	0	0	0	0	0	0	0	0
	363		0	0	0	0	0	0	0	0	0	0	0	0	0	0	0	0	0	0	0	0	0	0	0	0	0	0	0	0	0	0	0	0	0	0	0	0	0	0	0	0	0	0	0	0	0	0	0
	364		0	0	0	0	0	0	0	0	0	0	0	0	0	0	0	0	0	0	0	0	0	0	0	0	0	0	0	0	0	0	0	0	0	0	0	0	0	0	0	0	0	0	0	0	0	0	0
	365		1	1	1	0	0	0	0	0	0	0	0	0	0	0	0	0	0	0	0	0	0	0	0	0	0	0	0	0	0	0	0	0	0	0	0	0	0	0	0	0	0	0	0	0	0	0	0
	366		0	0	0	0	0	0	0	0	0	0	0	0	0	1	0	0	0	0	0	0	0	0	0	1	0	0	0	0	0	0	0	0	0	0	0	0	0	0	0	0	1	0	0	0	0	0	0
	367		0	0	0	0	0	0	0	0	0	0	0	0	0	1	0	0	0	0	0	0	0	0	0	1	0	0	0	0	0	0	0	0	0	0	0	0	0	0	0	0	1	0	0	0	0	0	0
	368		0	0	0	0	0	0	0	0	0	0	0	0	0	0	0	0	0	0	0	0	0	0	0	0	0	0	0	0	0	0	0	0	0	0	0	0	0	0	0	0	0	0	0	0	0	0	0
	369		0	0	0	0	0	0	0	0	0	0	0	0	0	1	0	0	0	0	0	0	0	0	0	1	0	0	0	0	0	0	0	0	0	0	0	0	0	0	0	0	1	0	0	0	0	0	0
	370		0	0	0	0	0	0	0	0	0	0	0	0	0	0	0	0	0	0	0	0	0	0	0	0	1	0	0	0	0	0	0	0	0	0	1	0	0	0	0	0	0	0	0	1	0	0	0
	371		0	0	0	0	0	0	0	0	0	0	0	0	0	0	0	0	0	0	0	0	0	0	0	0	0	1	0	1	0	0	0	0	0	0	0	0	0	0	0	0	0	0	0	0	0	0	0
	372		0	0	0	0	0	0	0	0	0	0	0	0	0	1	0	0	0	0	0	0	0	0	0	1	0	0	0	0	0	0	0	0	0	0	0	0	0	0	0	0	1	0	0	0	0	0	0
	373		0	0	0	0	0	0	0	0	0	0	0	0	0	0	0	0	0	0	0	0	0	0	0	0	1	0	0	0	0	0	0	1	1	0	0	0	0	0	0	0	0	0	0	0	0	0	0
	374		0	0	0	0	0	0	0	0	0	0	0	0	0	1	0	0	0	0	0	0	0	0	0	1	0	0	0	0	0	0	0	0	0	0	0	0	0	0	0	0	1	0	0	0	0	0	0
	375		0	0	0	0	0	0	0	0	0	0	0	0	0	1	0	0	0	0	0	0	0	0	0	1	0	0	0	0	0	0	0	0	0	0	0	0	0	0	0	0	1	0	0	0	0	0	0
	376		1	0	1	0	0	0	0	0	0	0	0	0	0	0	0	0	0	0	0	0	0	0	0	0	0	0	0	0	0	0	0	0	0	0	0	0	0	0	0	0	0	0	0	0	0	0	0
	377		0	0	0	0	0	0	0	0	0	0	0	0	0	0	0	0	0	0	0	0	0	0	0	0	0	0	0	0	0	0	0	0	0	0	0	0	0	0	0	0	0	0	0	0	0	0	0
	378		1	0	1	0	0	0	0	0	0	0	0	0	0	0	0	0	0	0	0	0	0	0	0	0	0	0	0	0	0	0	0	0	0	0	0	0	0	0	0	0	0	0	0	0	0	0	0
	379		1	0	1	0	0	0	0	0	0	0	0	0	0	0	0	0	0	0	0	0	0	0	0	0	0	0	0	0	0	0	0	0	0	0	0	0	0	0	0	0	0	0	0	0	0	0	0
	380		1	0	1	0	0	0	0	0	0	0	0	0	0	0	0	0	0	0	0	0	0	0	0	0	0	0	0	0	0	0	0	0	0	0	0	0	0	0	0	0	0	0	0	0	0	0	0
	381		0	0	0	0	0	0	0	0	0	0	0	0	0	0	0	0	0	0	0	0	0	0	0	0	0	0	0	0	0	0	0	1	1	0	0	0	0	0	0	0	0	0	0	0	0	0	0
	382		0	0	0	0	0	0	1	0	0	0	0	0	0	0	0	0	0	0	0	0	0	0	0	0	0	0	0	0	0	0	0	0	0	0	0	0	0	0	0	0	0	0	0	0	0	0	0
	383		1	0	1	0	0	0	0	0	0	0	0	0	0	0	0	0	0	0	0	0	0	0	0	0	0	0	0	0	0	0	0	0	0	0	0	0	0	0	0	0	0	0	0	0	0	0	0
	384		0	1	0	0	0	0	0	0	0	0	0	0	0	0	0	0	0	0	0	0	0	0	0	0	0	0	0	0	0	0	0	0	0	0	0	0	0	0	0	0	0	0	0	0	0	0	0
	385		1	0	1	0	0	0	0	0	0	0	0	0	0	0	0	0	0	0	0	0	0	0	0	0	0	0	0	0	0	0	0	0	0	0	0	0	0	0	0	0	0	0	0	0	0	0	0
	386		0	0	0	0	0	0	1	0	0	0	0	0	0	0	0	0	0	0	0	0	0	0	0	0	0	0	0	0	0	0	0	0	0	0	0	0	0	0	0	0	0	0	0	0	0	0	0
	387		0	0	0	0	0	0	0	0	0	0	0	0	0	0	0	0	0	0	0	0	0	0	0	0	0	0	0	0	0	0	0	0	0	0	0	0	0	0	0	0	0	0	0	0	0	0	0
	388		0	0	0	0	0	0	0	0	0	0	0	0	0	0	0	0	0	0	0	0	0	0	0	0	0	0	0	0	0	0	0	0	0	0	0	0	0	0	0	0	0	0	0	0	0	0	0
	389		0	0	0	0	0	0	1	0	0	0	0	0	0	0	0	0	0	0	0	0	0	0	0	0	0	0	0	0	0	0	0	0	0	0	0	0	0	0	0	0	0	0	0	0	0	0	0
	390		0	0	0	0	0	0	0	0	0	0	0	0	0	0	0	0	0	0	0	0	0	0	0	0	0	0	0	0	0	0	0	0	0	0	0	0	0	0	0	0	0	0	1	1	0	0	0
	391		1	0	1	0	0	0	0	0	0	0	0	0	0	0	0	0	0	0	0	0	0	0	0	0	0	0	0	0	0	0	0	0	0	0	0	0	0	0	0	0	0	0	0	0	0	0	0
	392		0	0	0	0	0	0	0	0	0	0	0	0	0	0	0	1	0	0	1	0	0	0	0	0	0	0	0	0	0	0	0	0	0	0	0	0	0	0	0	0	0	0	0	0	0	0	0
	393		1	0	1	0	0	0	0	0	0	0	0	0	0	0	0	0	0	0	0	0	0	0	0	0	0	0	0	0	0	0	0	0	0	0	0	0	0	0	0	0	0	0	0	0	0	0	0
	394		0	0	0	0	0	0	1	0	0	0	0	0	0	0	0	0	0	0	0	0	0	0	0	0	0	0	0	0	0	0	0	0	0	0	0	0	0	0	0	0	0	0	0	0	0	0	0
	395		0	0	0	0	0	0	0	0	0	0	0	0	0	0	0	1	0	0	1	0	0	0	0	0	0	0	0	0	0	0	0	0	0	0	0	0	0	0	0	0	0	0	0	0	0	0	0
	396		1	0	1	0	0	0	0	0	0	0	0	0	0	0	0	0	0	0	0	0	0	0	0	0	0	0	0	0	0	0	0	0	0	0	0	0	0	0	0	0	0	0	0	0	0	0	0
	397		0	0	0	0	0	0	1	0	0	0	0	0	0	0	0	0	0	0	0	0	0	0	0	0	0	0	0	0	0	0	0	0	0	0	0	0	0	0	0	0	0	0	0	0	0	0	0
	398		0	0	0	0	0	0	0	0	0	0	0	0	0	0	0	0	0	0	0	0	0	0	0	0	0	0	0	0	0	0	0	0	0	0	0	0	0	0	0	0	0	0	0	0	0	0	0
	399		1	0	1	0	0	0	0	0	0	0	0	0	0	0	0	0	0	0	0	0	0	0	0	0	0	0	0	0	0	0	0	0	0	0	0	0	0	0	0	0	0	0	0	0	0	0	0
	400		1	0	1	0	0	0	0	0	0	0	0	0	0	0	0	0	0	0	0	0	0	0	0	0	0	0	0	0	0	0	0	0	0	0	0	0	0	0	0	0	0	0	0	0	0	0	0
	401		0	0	0	0	0	0	0	0	0	0	0	0	0	0	0	0	0	0	0	0	0	0	0	0	0	0	0	0	0	0	0	1	1	0	0	0	0	0	0	0	0	0	0	0	0	0	0
	402		0	0	0	0	0	0	0	0	0	0	0	0	0	0	0	1	0	0	1	0	0	0	0	0	0	0	0	0	0	0	0	0	0	0	0	0	0	0	0	0	0	0	0	0	0	0	0
	403		1	0	1	0	0	0	0	0	0	0	0	0	0	0	0	0	0	0	0	0	0	0	0	0	0	0	0	0	0	0	0	0	0	0	0	0	0	0	0	0	0	0	0	0	0	0	0
	404		1	0	1	0	0	0	0	0	0	0	0	0	0	0	0	0	0	0	0	0	0	0	0	0	0	0	0	0	0	0	0	0	0	0	0	0	0	0	0	0	0	0	0	0	0	0	0
	405		0	0	0	0	0	0	0	0	0	0	0	0	0	0	0	1	0	0	1	0	0	0	0	0	0	0	0	0	0	0	0	0	0	0	0	0	0	0	0	0	0	0	0	0	0	0	0
	406		0	0	0	0	0	0	1	0	0	0	0	0	0	0	0	0	0	0	0	0	0	0	0	0	0	0	0	0	0	0	0	0	0	0	0	0	0	0	0	0	0	0	0	0	0	0	0
	407		0	0	0	0	0	0	0	0	0	0	0	0	0	0	0	1	0	0	1	0	0	0	0	0	0	0	0	0	0	0	0	0	0	0	0	0	0	0	0	0	0	0	0	0	0	0	0
	408		0	0	0	0	0	0	0	0	0	0	0	0	0	0	0	0	0	0	0	0	1	0	0	0	0	0	0	0	0	0	0	0	0	0	0	0	0	0	0	0	0	0	0	0	0	0	1
	409		0	0	0	0	0	0	0	0	0	0	0	0	0	0	0	0	0	0	0	0	0	0	0	0	0	0	1	0	0	0	0	0	0	0	0	0	0	0	0	0	0	0	0	0	0	1	0
	410		0	0	0	0	0	0	1	0	0	0	0	0	0	0	0	0	0	0	0	0	0	0	0	0	0	0	0	0	0	0	0	0	0	0	0	0	0	0	0	0	0	0	0	0	0	0	0
	411		0	0	0	0	0	0	1	0	0	0	0	0	0	0	0	0	0	0	0	0	0	0	0	0	0	0	0	0	0	0	0	0	0	0	0	0	0	0	0	0	0	0	0	0	0	0	0
	412		0	0	0	0	0	0	0	0	0	0	0	0	0	0	0	0	0	0	0	0	0	0	0	0	0	0	0	0	0	0	0	1	1	0	0	0	0	0	0	0	0	0	0	0	0	0	0
	413		1	0	1	0	0	0	0	0	0	0	0	0	0	0	0	0	0	0	0	0	0	0	0	0	0	0	0	0	0	0	0	0	0	0	0	0	0	0	0	0	0	0	0	0	0	0	0
	414		1	0	1	0	0	0	0	0	0	0	0	0	0	0	0	0	0	0	0	0	0	0	0	0	0	0	0	0	0	0	0	0	0	0	0	0	0	0	0	0	0	0	0	0	0	0	0
	415		0	0	0	0	0	0	1	0	0	0	0	0	0	0	0	0	0	0	0	0	0	0	0	0	0	0	0	0	0	0	0	0	0	0	0	0	0	0	0	0	0	0	0	0	0	0	0
	416		0	0	0	0	0	0	0	0	0	0	0	0	0	0	0	0	0	0	0	0	0	0	0	0	0	0	0	0	0	0	0	0	0	0	0	0	0	0	0	0	0	0	0	0	0	0	0
	417		1	0	1	0	0	0	0	0	0	0	0	0	0	0	0	0	0	0	0	0	0	0	0	0	0	0	0	0	0	0	0	0	0	0	0	0	0	0	0	0	0	0	0	0	0	0	0
	418		1	0	1	0	0	0	0	0	0	0	0	0	0	0	0	0	0	0	0	0	0	0	0	0	0	0	0	0	0	0	0	0	0	0	0	0	0	0	0	0	0	0	0	0	0	0	0
	419		0	0	0	0	0	0	1	0	0	0	0	0	0	0	0	0	0	0	0	0	0	0	0	0	0	0	0	0	0	0	0	0	0	0	0	0	0	0	0	0	0	0	0	0	0	0	0
	420		0	0	0	0	0	0	1	0	0	0	0	0	0	0	0	0	0	0	0	0	0	0	0	0	0	0	0	0	0	0	0	0	0	0	0	0	0	0	0	0	0	0	0	0	0	0	0
	421		1	0	1	0	0	0	0	0	0	0	0	0	0	0	0	0	0	0	0	0	0	0	0	0	0	0	0	0	0	0	0	0	0	0	0	0	0	0	0	0	0	0	0	0	0	0	0
	422		0	0	0	0	0	0	1	0	0	0	0	0	0	0	0	0	0	0	0	0	0	0	0	0	0	0	0	0	0	0	0	0	0	0	0	0	0	0	0	0	0	0	0	0	0	0	0
	423		0	0	0	0	0	0	1	0	0	0	0	0	0	0	0	0	0	0	0	0	0	0	0	0	0	0	0	0	0	0	0	0	0	0	0	0	0	0	0	0	0	0	0	0	0	0	0
	424		1	0	1	0	0	0	0	0	0	0	0	0	0	0	0	0	0	0	0	0	0	0	0	0	0	0	0	0	0	0	0	0	0	0	0	0	0	0	0	0	0	0	0	0	0	0	0
	425		0	0	0	0	0	0	0	0	0	0	0	0	0	1	0	0	0	0	0	0	0	0	0	0	0	0	0	0	0	0	0	0	0	0	0	0	0	0	0	0	1	0	0	0	0	0	0
	426		0	0	0	0	0	0	0	0	0	0	0	0	0	0	0	1	0	0	1	0	0	0	0	0	0	0	0	0	0	0	0	0	0	0	0	0	0	0	0	0	0	0	0	0	0	0	0
	427		0	0	0	0	0	0	1	0	0	0	0	0	0	0	0	0	0	0	0	0	0	0	0	0	0	0	0	0	0	0	0	0	0	0	0	0	0	0	0	0	0	0	0	0	0	0	0
	428		0	0	0	0	0	0	0	0	0	0	0	0	0	0	0	0	0	0	0	0	0	0	0	0	0	0	0	0	0	0	0	1	1	0	0	0	0	0	0	0	0	0	0	0	0	0	0
	429		0	0	0	0	0	0	0	0	0	0	0	0	0	0	0	0	0	0	0	0	0	0	0	0	0	0	0	0	0	0	1	0	0	0	0	0	0	0	0	1	0	0	0	0	0	0	0
	430		0	0	0	0	0	0	1	0	0	0	0	0	0	0	0	0	0	0	0	0	0	0	0	0	0	0	0	0	0	0	0	0	0	0	0	0	0	0	0	0	0	0	0	0	0	0	0
	431		1	0	1	0	0	0	0	0	0	0	0	0	0	0	0	0	0	0	0	0	0	0	0	0	0	0	0	0	0	0	0	0	0	0	0	0	0	0	0	0	0	0	0	0	0	0	0
	432		0	0	0	0	0	0	0	0	0	0	0	0	0	0	0	0	0	0	0	0	0	0	0	0	0	0	0	0	0	0	0	1	1	0	0	0	0	0	0	0	0	0	0	0	0	0	0
	433		1	0	1	0	0	0	0	0	0	0	0	0	0	0	0	0	0	0	0	0	0	0	0	0	0	0	0	0	0	0	0	0	0	0	0	0	0	0	0	0	0	0	0	0	0	0	0
	434		1	0	1	0	0	0	0	0	0	0	0	0	0	0	0	0	0	0	0	0	0	0	0	0	0	0	0	0	0	0	0	0	0	0	0	0	0	0	0	0	0	0	0	0	0	0	0
	435		0	0	0	0	0	0	0	0	0	0	0	0	0	0	0	0	0	0	0	0	0	0	0	0	0	0	1	0	0	0	0	0	0	0	0	0	0	0	0	0	0	0	0	0	0	1	0
	436		0	0	0	0	0	0	0	0	0	0	0	0	0	0	0	0	0	0	0	0	0	0	0	0	0	0	1	0	0	0	0	0	0	0	0	0	0	0	0	0	0	0	0	0	0	1	0
	437		0	0	0	0	0	0	0	0	0	0	0	0	0	0	0	0	0	0	0	0	0	0	0	0	0	0	1	0	0	0	0	0	0	0	0	0	0	0	0	0	0	0	0	0	0	0	0
	438		0	0	0	0	0	0	1	0	0	0	0	0	0	0	0	0	0	0	0	0	0	0	0	0	0	0	0	0	0	0	0	0	0	0	0	0	0	0	0	0	0	0	0	0	0	0	0
	439		0	0	0	0	0	0	1	0	0	0	0	0	0	0	0	0	0	0	0	0	0	0	0	0	0	0	0	0	0	0	0	0	0	0	0	0	0	0	0	0	0	0	0	0	0	0	0
	440		0	0	0	0	0	0	1	0	0	0	0	0	0	0	0	0	0	0	0	0	0	0	0	0	0	0	0	0	0	0	0	0	0	0	0	0	0	0	0	0	0	0	0	0	0	0	0
	441		0	1	0	0	0	0	0	0	0	0	0	0	0	0	0	0	0	0	0	0	0	0	0	0	0	0	0	0	0	0	0	0	0	0	0	0	0	0	0	0	0	0	0	0	0	0	0
	442		1	0	1	0	0	0	0	0	0	0	0	0	0	0	0	0	0	0	0	0	0	0	0	0	0	0	0	0	0	0	0	0	0	0	0	0	0	0	0	0	0	0	0	0	0	0	0
	443		0	0	0	0	0	0	0	0	0	0	0	0	0	0	0	0	0	0	0	0	0	0	0	0	0	0	0	0	0	0	0	0	0	0	0	0	0	0	0	0	0	0	0	0	0	0	0
	444		0	0	0	0	0	0	0	0	0	0	0	0	0	0	0	0	0	0	0	0	0	0	0	0	0	0	0	1	0	0	0	0	0	0	0	0	0	0	0	0	0	0	0	0	0	0	0
	445		0	0	0	0	0	0	1	0	0	0	0	0	0	0	0	0	0	0	0	0	0	0	0	0	0	0	0	0	0	0	0	0	0	0	0	0	0	0	0	0	0	0	0	0	0	0	0
	446		1	0	1	0	0	0	0	0	0	0	0	0	0	0	0	0	0	0	0	0	0	0	0	0	0	0	0	0	0	0	0	0	0	0	0	0	0	0	0	0	0	0	0	0	0	0	0
	447		0	0	0	0	0	0	0	0	0	0	0	0	0	0	0	0	0	0	0	0	0	0	0	0	0	0	0	0	0	0	0	1	1	0	0	0	0	0	0	0	0	0	0	0	0	0	0
	448		1	0	1	0	0	0	0	0	0	0	0	0	0	0	0	0	0	0	0	0	0	0	0	0	0	0	0	0	0	0	0	0	0	0	0	0	0	0	0	0	0	0	0	0	0	0	0
	449		1	0	1	0	0	0	0	0	0	0	0	0	0	0	0	0	0	0	0	0	0	0	0	0	0	0	0	0	0	0	0	0	0	0	0	0	0	0	0	0	0	0	0	0	0	0	0
	450		0	0	0	0	0	0	0	0	0	0	0	0	0	0	0	0	0	0	0	0	0	0	0	0	0	0	0	0	0	0	0	0	0	0	0	0	0	0	0	0	0	0	0	0	0	0	0
	451		0	0	0	0	0	0	0	0	0	0	0	0	0	0	0	0	1	0	0	0	0	0	0	0	0	0	0	0	0	0	0	0	0	0	0	0	0	0	0	0	0	0	0	0	1	0	0
	452		1	0	1	0	0	0	0	0	0	0	0	0	0	0	0	0	0	0	0	0	0	0	0	0	0	0	0	0	0	0	0	0	0	0	0	0	0	0	0	0	0	0	0	0	0	0	0
	453		1	0	1	0	0	0	0	0	0	0	0	0	0	0	0	0	0	0	0	0	0	0	0	0	0	0	0	0	0	0	0	0	0	0	0	0	0	0	0	0	0	0	0	0	0	0	0
	454		0	0	0	0	0	0	1	0	0	0	0	0	0	0	0	0	0	0	0	0	0	0	0	0	0	0	0	0	0	0	0	0	0	0	0	0	0	0	0	0	0	0	0	0	0	0	0
	455		0	0	0	0	0	0	0	0	0	0	0	0	0	1	0	0	0	0	0	0	0	0	0	0	0	0	0	0	0	0	0	0	0	0	0	0	0	0	0	0	1	0	0	0	0	0	0
	456		0	0	0	0	0	0	0	0	0	0	0	0	0	0	0	0	0	0	0	0	0	0	0	0	0	0	0	0	0	0	0	1	1	0	0	0	0	0	0	0	0	0	0	0	0	0	0
	457		1	0	1	0	0	0	0	0	0	0	0	0	0	0	0	0	0	0	0	0	0	0	0	0	0	0	0	0	0	0	0	0	0	0	0	0	0	0	0	0	0	0	0	0	0	0	0
	458		1	0	1	0	0	0	0	0	0	0	0	0	0	0	0	0	0	0	0	0	0	0	0	0	0	0	0	0	0	0	0	0	0	0	0	0	0	0	0	0	0	0	0	0	0	0	0
	459		1	0	1	0	0	0	0	0	0	0	0	0	0	0	0	0	0	0	0	0	0	0	0	0	0	0	0	0	0	0	0	0	0	0	0	0	0	0	0	0	0	0	0	0	0	0	0
	460		0	0	0	0	0	0	0	0	0	0	0	0	0	0	0	0	0	0	0	0	0	0	0	0	0	0	1	0	0	0	0	0	0	0	0	0	0	0	0	0	0	0	0	0	0	1	0
	461		0	0	0	0	0	0	0	0	0	0	0	0	0	0	0	0	0	0	0	0	0	0	0	0	0	0	0	0	0	0	0	0	0	0	0	0	0	0	0	0	0	0	0	0	0	0	0
	462		0	0	0	0	0	0	0	0	0	0	0	0	0	0	0	0	0	0	0	0	0	0	0	0	0	0	0	0	0	0	0	0	0	0	0	0	0	0	0	0	0	0	0	0	0	0	0
	463		0	0	0	0	0	0	0	0	0	0	0	0	0	0	0	0	0	0	0	0	0	0	0	0	0	0	0	0	0	0	0	0	0	0	0	0	0	0	0	0	0	0	0	0	0	0	0
	464		0	0	0	0	0	0	1	0	0	0	0	0	0	0	0	0	0	0	0	0	0	0	0	0	0	0	0	0	0	0	0	0	0	0	0	0	0	0	0	0	0	0	0	0	0	0	0
	465		0	0	0	0	0	0	0	0	0	0	0	0	0	0	0	0	0	0	0	0	0	0	0	0	0	0	0	0	0	0	0	0	0	0	0	0	0	0	0	0	0	0	0	0	0	0	2
	466		0	0	0	0	0	0	1	0	0	0	0	0	0	0	0	0	0	0	0	0	0	0	0	0	0	0	0	0	0	0	0	0	0	0	0	0	0	0	0	0	0	0	0	0	0	0	0
	467		1	0	1	0	0	0	0	0	0	0	0	0	0	0	0	0	0	0	0	0	0	0	0	0	0	0	0	0	0	0	0	0	0	0	0	0	0	0	0	0	0	0	0	0	0	0	0
	468		1	0	1	0	0	0	0	0	0	0	0	0	0	0	0	0	0	0	0	0	0	0	0	0	0	0	0	0	0	0	0	0	0	0	0	0	0	0	0	0	0	0	0	0	0	0	0
	469		1	0	1	0	0	0	0	0	0	0	0	0	0	0	0	0	0	0	0	0	0	0	0	0	0	0	0	0	0	0	0	0	0	0	0	0	0	0	0	0	0	0	0	0	0	0	0
	470		1	0	1	0	0	0	0	0	0	0	0	0	0	0	0	0	0	0	0	0	0	0	0	0	0	0	0	0	0	0	0	0	0	0	0	0	0	0	0	0	0	0	0	0	0	0	0
	471		0	0	0	0	0	0	0	0	0	0	0	0	0	0	0	0	0	0	0	0	0	0	0	0	0	0	0	0	0	0	0	0	0	0	0	0	0	0	0	0	0	0	0	0	0	0	0
	472		1	0	1	0	0	0	0	0	0	0	0	0	0	0	0	0	0	0	0	0	0	0	0	0	0	0	0	0	0	0	0	0	0	0	0	0	0	0	0	0	0	0	0	0	0	0	0
	473		0	0	0	0	0	0	0	0	0	0	0	0	0	0	0	0	0	0	0	0	0	0	0	0	0	0	0	0	0	0	0	0	0	0	0	0	0	0	0	0	0	0	0	0	0	0	0
	474		1	0	1	0	0	0	0	0	0	0	0	0	0	0	0	0	0	0	0	0	0	0	0	0	0	0	0	0	0	0	0	0	0	0	0	0	0	0	0	0	0	0	0	0	0	0	0
	475		1	0	1	0	0	0	0	0	0	0	0	0	0	0	0	0	0	0	0	0	0	0	0	0	0	0	0	0	0	0	0	0	0	0	0	0	0	0	0	0	0	0	0	0	0	0	0
	476		0	0	0	0	0	0	1	0	0	0	0	0	0	0	0	0	0	0	0	0	0	0	0	0	0	0	0	0	0	0	0	0	0	0	0	0	0	0	0	0	0	0	0	0	0	0	0
	477		1	0	1	0	0	0	0	0	0	0	0	0	0	0	0	0	0	0	0	0	0	0	0	0	0	0	0	0	0	0	0	0	0	0	0	0	0	0	0	0	0	0	0	0	0	0	0
	478		1	0	1	0	0	0	0	0	0	0	0	0	0	0	0	0	0	0	0	0	0	0	0	0	0	0	0	0	0	0	0	0	0	0	0	0	0	0	0	0	0	0	0	0	0	0	0
	479		0	0	0	0	0	0	0	0	0	0	0	0	0	0	0	0	0	0	0	0	0	0	0	0	1	0	0	0	0	0	0	0	0	0	1	0	0	0	0	0	0	0	0	0	0	0	0
	480		0	0	0	0	0	0	0	0	0	0	0	0	0	0	0	0	0	0	0	0	0	0	0	0	0	0	0	0	0	0	0	1	1	0	0	0	0	0	0	0	0	0	0	0	0	0	0
	481		1	0	1	0	0	0	0	0	0	0	0	0	0	0	0	0	0	0	0	0	0	0	0	0	0	0	0	0	0	0	0	0	0	0	0	0	0	0	0	0	0	0	0	0	0	0	0
	482		0	0	0	0	0	0	1	0	0	0	0	0	0	0	0	0	0	0	0	0	0	0	0	0	0	0	0	0	0	0	0	0	0	0	0	0	0	0	0	0	0	0	0	0	0	0	0
	483		0	0	0	0	0	0	0	0	0	0	0	0	0	0	0	0	0	0	0	0	0	0	0	0	0	0	0	0	0	0	0	0	0	0	0	0	0	0	0	0	0	0	0	0	0	0	0
	484		0	0	0	0	0	0	0	0	0	0	0	0	0	0	0	1	0	0	1	0	0	0	0	0	0	0	0	0	0	0	0	0	0	0	0	0	0	0	0	0	0	0	0	0	0	0	0
	485		0	0	0	0	0	0	0	0	0	0	0	0	0	0	0	0	0	0	0	0	0	0	0	0	0	0	0	0	0	0	0	0	0	0	0	0	0	0	0	0	0	0	0	0	0	0	0
	486		0	0	0	0	0	0	0	0	0	0	0	0	0	0	0	0	0	0	0	0	0	0	0	0	0	0	0	0	0	0	0	1	1	0	0	0	0	0	0	0	0	0	0	0	0	0	0
	487		1	0	1	0	0	0	0	0	0	0	0	0	0	0	0	0	0	0	0	0	0	0	0	0	0	0	0	0	0	0	0	0	0	0	0	0	0	0	0	0	0	0	0	0	0	0	0
	488		0	0	0	0	0	0	0	0	0	0	0	0	0	0	0	1	0	0	1	0	0	0	0	0	0	0	0	0	0	0	0	0	0	0	0	0	0	0	0	0	0	0	0	0	0	0	0
	489		1	0	1	0	0	0	0	0	0	0	0	0	0	0	0	0	0	0	0	0	0	0	0	0	0	0	0	0	0	0	0	0	0	0	0	0	0	0	0	0	0	0	0	0	0	0	0
	490		1	0	1	0	0	0	0	0	0	0	0	0	0	0	0	0	0	0	0	0	0	0	0	0	0	0	0	0	0	0	0	0	0	0	0	0	0	0	0	0	0	0	0	0	0	0	0
	491		0	0	0	0	0	0	1	0	0	0	0	0	0	0	0	0	0	0	0	0	0	0	0	0	0	0	0	0	0	0	0	0	0	0	0	0	0	0	0	0	0	0	0	0	0	0	0
	492		1	0	1	0	0	0	0	0	0	0	0	0	0	0	0	0	0	0	0	0	0	0	0	0	0	0	0	0	0	0	0	0	0	0	0	0	0	0	0	0	0	0	0	0	0	0	0
	493		0	0	0	0	0	0	1	0	0	0	0	0	0	0	0	0	0	0	0	0	0	0	0	0	0	0	0	0	0	0	0	0	0	0	0	0	0	0	0	0	0	0	0	0	0	0	0
	494		0	0	0	0	0	0	0	0	0	0	0	0	0	0	0	0	0	0	0	0	0	0	0	0	0	0	0	0	0	0	0	1	1	0	0	0	0	0	0	0	0	0	0	0	0	0	0
	495		1	0	1	0	0	0	0	0	0	0	0	0	0	0	0	0	0	0	0	0	0	0	0	0	0	0	0	0	0	0	0	0	0	0	0	0	0	0	0	0	0	0	0	0	0	0	0
	496		0	1	0	0	0	0	0	0	0	0	0	0	0	0	0	0	0	0	0	0	0	0	0	0	0	0	0	0	0	0	0	0	0	0	0	0	0	0	0	0	0	0	0	0	0	0	0
	497		0	0	0	0	0	0	1	0	0	0	0	0	0	0	0	0	0	0	0	0	0	0	0	0	0	0	0	0	0	0	0	0	0	0	0	0	0	0	0	0	0	0	0	0	0	0	0
	498		0	0	0	0	0	0	1	0	0	0	0	0	0	0	0	0	0	0	0	0	0	0	0	0	0	0	0	0	0	0	0	0	0	0	0	0	0	0	0	0	0	0	0	0	0	0	0
	499		0	0	0	0	0	0	0	0	0	0	0	0	0	0	0	0	0	0	0	0	0	0	0	0	0	0	1	0	0	0	0	0	0	0	0	0	0	0	0	0	0	0	0	0	0	1	0
	500		0	0	0	0	0	0	1	0	0	0	0	0	0	0	0	0	0	0	0	0	0	0	0	0	0	0	0	0	0	0	0	0	0	0	0	0	0	0	0	0	0	0	0	0	0	0	0
	501		1	0	1	0	0	0	0	0	0	0	0	0	0	0	0	0	0	0	0	0	0	0	0	0	0	0	0	0	0	0	0	0	0	0	0	0	0	0	0	0	0	0	0	0	0	0	0
	502		0	0	0	0	0	0	1	0	0	0	0	0	0	0	0	0	0	0	0	0	0	0	0	0	0	0	0	0	0	0	0	0	0	0	0	0	0	0	0	0	0	0	0	0	0	0	0
	503		1	0	1	0	0	0	0	0	0	0	0	0	0	0	0	0	0	0	0	0	0	0	0	0	0	0	0	0	0	0	0	0	0	0	0	0	0	0	0	0	0	0	0	0	0	0	0
	504		0	0	0	0	0	0	0	0	0	0	0	0	0	0	0	0	0	0	0	0	0	0	0	0	0	0	0	0	0	0	0	0	0	0	0	0	0	0	0	0	0	0	0	0	0	0	0
	505		1	0	1	0	0	0	0	0	0	0	0	0	0	0	0	0	0	0	0	0	0	0	0	0	0	0	0	0	0	0	0	0	0	0	0	0	0	0	0	0	0	0	0	0	0	0	0
	506		1	0	1	0	0	0	0	0	0	0	0	0	0	0	0	0	0	0	0	0	0	0	0	0	0	0	0	0	0	0	0	0	0	0	0	0	0	0	0	0	0	0	0	0	0	0	0
	507		0	0	0	0	0	0	1	0	0	0	0	0	0	0	0	0	0	0	0	0	0	0	0	0	0	0	0	0	0	0	0	0	0	0	0	0	0	0	0	0	0	0	0	0	0	0	0
	508		1	0	1	0	0	0	0	0	0	0	0	0	0	0	0	0	0	0	0	0	0	0	0	0	0	0	0	0	0	0	0	0	0	0	0	0	0	0	0	0	0	0	0	0	0	0	0
	509		0	0	0	0	0	0	0	0	0	0	0	0	0	0	0	0	0	0	0	0	0	0	0	0	0	0	0	0	0	0	0	0	0	0	0	0	0	0	0	0	0	0	0	0	0	0	0
	510		0	0	0	0	0	0	0	0	0	0	0	0	0	0	0	0	0	0	0	0	0	0	0	0	0	0	0	0	0	0	0	0	0	0	0	0	0	0	0	0	0	0	0	0	0	0	0
	511		1	0	1	0	0	0	0	0	0	0	0	0	0	0	0	0	0	0	0	0	0	0	0	0	0	0	0	0	0	0	0	0	0	0	0	0	0	0	0	0	0	0	0	0	0	0	0
	512		0	0	0	0	0	0	1	0	0	0	0	0	0	0	0	0	0	0	0	0	0	0	0	0	0	0	0	0	0	0	0	0	0	0	0	0	0	0	0	0	0	0	0	0	0	0	0
	513		1	0	1	0	0	0	0	0	0	0	0	0	0	0	0	0	0	0	0	0	0	0	0	0	0	0	0	0	0	0	0	0	0	0	0	0	0	0	0	0	0	0	0	0	0	0	0
	514		1	0	1	0	0	0	0	0	0	0	0	0	0	0	0	0	0	0	0	0	0	0	0	0	0	0	0	0	0	0	0	0	0	0	0	0	0	0	0	0	0	0	0	0	0	0	0
	515		0	0	0	0	0	0	0	0	0	0	0	0	0	0	0	0	0	0	0	0	0	0	0	0	0	0	0	0	0	0	0	1	1	0	0	0	0	0	0	0	0	0	0	0	0	0	0
	516		1	0	1	0	0	0	0	0	0	0	0	0	0	0	0	0	0	0	0	0	0	0	0	0	0	0	0	0	0	0	0	0	0	0	0	0	0	0	0	0	0	0	0	0	0	0	0
	517		0	0	0	0	0	0	1	0	0	0	0	0	0	0	0	0	0	0	0	0	0	0	0	0	0	0	0	0	0	0	0	0	0	0	0	0	0	0	0	0	0	0	0	0	0	0	0
	518		1	0	1	0	0	0	0	0	0	0	0	0	0	0	0	0	0	0	0	0	0	0	0	0	0	0	0	0	0	0	0	0	0	0	0	0	0	0	0	0	0	0	0	0	0	0	0
	519		0	0	0	0	0	0	0	0	0	0	0	0	0	0	0	0	0	0	0	0	0	0	0	0	0	0	1	0	0	0	0	0	0	0	0	0	0	0	0	0	0	0	0	0	0	1	0
	520		1	0	1	0	0	0	0	0	0	0	0	0	0	0	0	0	0	0	0	0	0	0	0	0	0	0	0	0	0	0	0	0	0	0	0	0	0	0	0	0	0	0	0	0	0	0	0
	521		0	0	0	0	0	0	0	0	0	0	0	0	0	0	0	1	0	0	1	0	0	0	0	0	0	0	0	0	0	0	0	0	0	0	0	0	0	0	0	0	0	0	0	0	0	0	0
	522		0	0	0	0	0	0	1	0	0	0	0	0	0	0	0	0	0	0	0	0	0	0	0	0	0	0	0	0	0	0	0	0	0	0	0	0	0	0	0	0	0	0	0	0	0	0	0
	523		0	0	0	0	0	0	1	0	0	0	0	0	0	0	0	0	0	0	0	0	0	0	0	0	0	0	0	0	0	0	0	0	0	0	0	0	0	0	0	0	0	0	0	0	0	0	0
	524		0	0	0	0	0	0	0	0	0	0	0	0	0	0	0	0	0	0	0	0	0	0	0	0	0	0	0	0	0	0	0	0	0	0	0	0	0	0	0	0	0	0	0	0	0	0	0
	525		0	0	0	0	0	0	1	0	0	0	0	0	0	0	0	0	0	0	0	0	0	0	0	0	0	0	0	0	0	0	0	0	0	0	0	0	0	0	0	0	0	0	0	0	0	0	0
	526		0	0	0	0	0	0	0	0	0	0	0	0	0	0	0	0	0	0	0	0	0	0	0	0	0	0	1	0	0	0	0	0	0	0	0	0	0	0	0	0	0	0	0	0	0	1	0
	527		0	0	0	0	0	0	0	0	0	0	0	0	0	0	0	0	0	0	0	0	0	0	0	0	0	0	0	0	0	0	0	1	1	0	0	0	0	0	0	0	0	0	0	0	0	0	0
	528		1	0	1	0	0	0	0	0	0	0	0	0	0	0	0	0	0	0	0	0	0	0	0	0	0	0	0	0	0	0	0	0	0	0	0	0	0	0	0	0	0	0	0	0	0	0	0
	529		1	0	1	0	0	0	0	0	0	0	0	0	0	0	0	0	0	0	0	0	0	0	0	0	0	0	0	0	0	0	0	0	0	0	0	0	0	0	0	0	0	0	0	0	0	0	0
	530		0	0	0	0	0	0	0	0	0	0	0	0	0	0	0	1	0	0	1	0	0	0	0	0	0	0	0	0	0	0	0	0	0	0	0	0	0	0	0	0	0	0	0	0	0	0	0
	531		0	0	0	0	0	0	0	0	0	0	0	0	0	0	0	0	0	0	0	0	0	0	0	0	0	0	0	0	0	0	0	0	0	0	0	0	0	0	0	1	0	1	0	0	0	0	0
	532		1	0	1	0	0	0	0	0	0	0	0	0	0	0	0	0	0	0	0	0	0	0	0	0	0	0	0	0	0	0	0	0	0	0	0	0	0	0	0	0	0	0	0	0	0	0	0
	533		0	0	0	0	0	0	0	0	0	0	0	0	0	0	0	0	0	0	0	0	0	0	0	0	0	0	0	0	0	0	0	0	0	0	0	0	0	0	0	0	0	0	0	0	0	0	0
	534		0	0	0	0	0	0	0	0	0	0	0	0	0	0	0	1	0	0	1	0	0	0	0	0	0	0	0	0	0	0	0	0	0	0	0	0	0	0	0	0	0	0	0	0	0	0	0
	535		0	0	0	0	0	0	0	0	0	0	0	0	0	0	0	0	0	0	0	0	0	0	0	0	0	0	0	0	0	0	0	1	1	0	0	0	0	0	0	0	0	0	0	0	0	0	0
	536		0	0	0	0	0	0	0	0	0	0	0	0	0	0	0	1	0	0	1	0	0	0	0	0	0	0	0	0	0	0	0	0	0	0	0	0	0	0	0	0	0	0	0	0	0	0	0
	537		1	0	1	0	0	0	0	0	0	0	0	0	0	0	0	0	0	0	0	0	0	0	0	0	0	0	0	0	0	0	0	0	0	0	0	0	0	0	0	0	0	0	0	0	0	0	0
	538		0	0	0	0	0	0	1	0	0	0	0	0	0	0	0	0	0	0	0	0	0	0	0	0	0	0	0	0	0	0	0	0	0	0	0	0	0	0	0	0	0	0	0	0	0	0	0
	539		0	0	0	0	0	0	0	0	0	0	0	0	0	1	0	0	0	0	0	0	0	0	0	1	0	0	0	0	0	0	0	0	0	0	0	0	0	0	0	0	0	0	0	0	0	0	0
	540		1	0	1	0	0	0	0	0	0	0	0	0	0	0	0	0	0	0	0	0	0	0	0	0	0	0	0	0	0	0	0	0	0	0	0	0	0	0	0	0	0	0	0	0	0	0	0
	541		0	0	0	0	0	0	0	0	0	0	0	0	0	0	0	0	0	0	0	0	0	0	0	0	0	0	0	0	0	0	0	0	0	0	0	0	0	0	0	0	0	0	0	0	0	0	0
	542		0	0	0	0	0	0	1	0	0	0	0	0	0	0	0	0	0	0	0	0	0	0	0	0	0	0	0	0	0	0	0	0	0	0	0	0	0	0	0	0	0	0	0	0	0	0	0
	543		1	0	1	0	0	0	0	0	0	0	0	0	0	0	0	0	0	0	0	0	0	0	0	0	0	0	0	0	0	0	0	0	0	0	0	0	0	0	0	0	0	0	0	0	0	0	0
	544		1	0	1	0	0	0	0	0	0	0	0	0	0	0	0	0	0	0	0	0	0	0	0	0	0	0	0	0	0	0	0	0	0	0	0	0	0	0	0	0	0	0	0	0	0	0	0
	545		0	0	0	0	0	0	0	0	0	0	0	0	0	0	0	0	0	0	0	0	0	0	0	0	0	0	0	0	0	0	0	1	1	0	0	0	0	0	0	0	0	0	0	0	0	0	0
	546		0	0	0	0	0	0	0	0	0	0	0	0	0	0	0	0	0	0	0	0	0	0	0	0	0	0	0	0	0	0	0	1	1	0	0	0	0	0	0	0	0	0	0	0	0	0	0
	547		0	0	0	0	0	0	1	0	0	0	0	0	0	0	0	0	0	0	0	0	0	0	0	0	0	0	0	0	0	0	0	0	0	0	0	0	0	0	0	0	0	0	0	0	0	0	0
	548		0	0	0	0	0	0	1	0	0	0	0	0	0	0	0	0	0	0	0	0	0	0	0	0	0	0	0	0	0	0	0	0	0	0	0	0	0	0	0	0	0	0	0	0	0	0	0
	549		1	0	1	0	0	0	0	0	0	0	0	0	0	0	0	0	0	0	0	0	0	0	0	0	0	0	0	0	0	0	0	0	0	0	0	0	0	0	0	0	0	0	0	0	0	0	0
	550		0	0	0	0	0	0	1	0	0	0	0	0	0	0	0	0	0	0	0	0	0	0	0	0	0	0	0	0	0	0	0	0	0	0	0	0	0	0	0	0	0	0	0	0	0	0	0
	551		0	0	0	0	0	0	1	0	0	0	0	0	0	0	0	0	0	0	0	0	0	0	0	0	0	0	0	0	0	0	0	0	0	0	0	0	0	0	0	0	0	0	0	0	0	0	0
	552		1	0	1	0	0	0	0	0	0	0	0	0	0	0	0	0	0	0	0	0	0	0	0	0	0	0	0	0	0	0	0	0	0	0	0	0	0	0	0	0	0	0	0	0	0	0	0
	553		0	0	0	0	0	0	0	0	0	0	0	0	0	0	0	0	0	0	0	0	0	0	0	0	0	0	1	0	0	0	0	0	0	0	0	0	0	0	0	0	0	0	0	0	0	1	0
	554		0	0	0	0	0	0	1	0	0	0	0	0	0	0	0	0	0	0	0	0	0	0	0	0	0	0	0	0	0	0	0	0	0	0	0	0	0	0	0	0	0	0	0	0	0	0	0
	555		0	0	0	0	0	0	0	0	0	0	0	0	0	0	0	0	0	0	0	0	0	0	0	0	0	0	1	0	0	0	0	0	0	0	0	0	0	0	0	0	0	0	0	0	0	1	0
	556		0	0	0	0	0	0	0	0	0	0	0	0	0	0	0	0	0	0	0	0	0	0	0	0	0	0	0	0	0	0	0	1	1	0	0	0	0	0	0	0	0	0	0	0	0	0	0
	557		1	0	1	0	0	0	0	0	0	0	0	0	0	0	0	0	0	0	0	0	0	0	0	0	0	0	0	0	0	0	0	0	0	0	0	0	0	0	0	0	0	0	0	0	0	0	0
	558		0	0	0	0	0	0	0	0	0	0	0	0	0	0	0	0	0	0	0	0	0	0	0	0	0	0	0	0	0	0	0	0	0	0	0	0	0	0	0	0	0	0	0	0	0	0	0
	559		0	0	0	0	0	0	0	0	0	1	0	0	0	0	0	0	0	0	0	0	0	0	0	0	0	0	0	0	0	0	0	0	0	0	0	0	0	0	0	0	0	0	0	0	0	0	0
	560		0	0	0	0	0	0	0	0	0	0	0	0	0	0	0	0	0	0	0	0	0	0	0	0	0	0	0	0	0	0	0	0	0	0	0	0	0	0	0	0	0	0	0	0	0	0	0
	561		0	0	0	0	0	0	0	0	0	0	0	0	0	0	0	0	0	0	0	0	0	0	0	0	1	0	0	0	0	0	0	0	0	0	0	0	0	0	0	0	0	0	0	0	0	0	0
	562		0	0	0	0	0	0	0	0	0	0	0	0	0	0	0	0	0	0	0	0	0	0	0	0	0	0	0	0	0	0	0	0	0	0	0	0	0	0	0	0	0	0	0	0	0	0	0
	563		0	0	0	0	0	0	0	0	0	0	0	0	0	0	0	0	0	0	0	0	0	0	0	0	0	0	0	0	0	0	0	0	0	0	0	0	0	0	0	0	0	0	0	0	0	0	0
	564		0	0	0	0	0	0	0	0	0	0	0	0	0	0	0	1	0	0	0	0	0	0	0	0	0	0	0	0	0	0	0	0	0	0	0	0	0	0	0	0	0	0	0	0	0	0	0
	565		0	0	0	0	0	0	0	0	0	0	0	1	0	0	0	0	0	0	0	0	0	0	0	0	0	0	0	0	0	0	0	0	0	0	0	0	0	0	0	0	0	0	0	0	0	0	0
	566		0	0	0	0	0	0	0	0	0	0	0	0	0	0	0	0	0	0	0	0	0	0	0	0	0	0	0	0	0	0	0	0	0	0	0	0	0	0	0	0	0	0	0	0	0	0	0
	567		0	0	0	0	0	0	0	0	0	0	0	0	0	0	0	0	0	0	0	0	0	0	0	0	0	0	0	0	0	0	0	0	0	0	0	0	0	0	0	0	0	0	0	0	0	0	0
	568		0	0	0	0	0	0	0	0	0	0	0	0	0	0	0	0	0	0	0	0	0	0	0	0	0	0	0	0	0	0	0	0	0	0	0	0	0	0	0	0	0	0	0	0	0	0	0
	569		0	0	0	0	0	0	0	0	0	0	1	0	0	0	0	0	0	0	0	0	0	0	0	0	0	0	0	0	0	0	0	0	0	0	0	0	0	0	0	0	0	0	0	0	0	0	0
	570		0	0	0	0	0	0	0	0	0	0	0	0	1	0	0	0	0	0	0	0	0	0	0	0	0	0	0	0	0	0	0	0	0	0	0	0	0	0	0	0	0	0	0	0	0	0	0
	571		0	0	0	0	0	0	0	0	0	0	0	0	0	0	0	0	0	0	0	0	0	0	0	0	0	0	0	0	0	0	0	0	0	0	0	0	0	0	0	0	0	0	0	0	0	0	0
	572		0	0	0	0	0	0	0	0	0	0	1	0	0	0	0	0	0	0	0	0	0	0	0	0	0	0	0	0	0	0	0	0	0	0	0	0	0	0	0	0	0	0	0	0	0	0	0
	573		0	0	0	0	0	0	0	0	0	0	0	0	0	0	0	0	0	0	0	0	0	0	0	0	0	0	0	0	0	0	0	0	0	0	0	0	0	0	0	0	0	0	0	0	0	1	0
	574		0	0	0	0	0	0	0	0	0	1	0	0	0	0	0	0	0	0	0	0	0	0	0	0	0	0	0	0	0	0	0	0	0	0	0	0	0	0	0	0	0	0	0	0	0	0	0
	575		0	0	0	0	0	0	0	0	0	0	0	0	0	0	0	0	0	0	0	0	0	0	0	0	1	0	0	0	0	0	0	0	0	0	0	0	0	0	0	0	0	0	0	0	0	0	0
	576		0	0	0	0	0	0	0	0	0	0	0	1	0	0	0	0	0	0	0	0	0	0	0	0	0	0	0	0	0	0	0	0	0	0	0	0	0	0	0	0	0	0	0	0	0	0	0
	577		0	0	0	0	0	0	0	0	0	0	1	0	0	0	0	0	0	0	0	0	0	0	0	0	0	0	0	0	0	0	0	0	0	0	0	0	0	0	0	0	0	0	0	0	0	0	0
	578		0	0	0	0	0	0	0	0	0	0	0	0	0	0	0	0	0	0	0	0	0	0	0	0	0	0	1	0	0	0	0	0	0	0	0	0	0	0	0	0	0	0	0	0	0	0	0
	579		0	1	0	0	0	0	0	0	0	0	0	0	0	0	0	0	0	0	0	0	0	0	0	0	0	0	0	0	0	0	0	0	0	0	0	0	0	0	0	0	0	0	0	0	0	0	0
	580		0	0	0	0	0	0	0	0	0	1	0	0	0	0	0	0	0	0	0	0	0	0	0	0	0	0	0	0	0	0	0	0	0	0	0	0	0	0	0	0	0	0	0	0	0	0	0
	581		0	0	0	0	0	0	0	0	0	0	0	0	0	0	0	0	0	0	0	0	0	0	0	0	0	0	0	0	0	0	0	0	0	1	0	0	0	0	0	0	0	0	0	0	0	0	0
	582		0	0	0	0	0	0	0	0	0	0	0	0	0	0	0	0	0	0	0	0	0	0	0	0	0	0	0	0	0	0	0	0	0	0	0	0	0	0	0	0	0	0	0	0	0	0	0
	583		0	0	0	0	0	0	0	0	0	1	0	0	0	0	0	0	0	0	0	0	0	0	0	0	0	0	0	0	0	0	0	0	0	0	0	0	0	0	0	0	0	0	0	0	0	0	0
	584		0	0	0	0	0	0	0	0	0	0	0	0	0	0	0	0	0	0	0	0	0	0	0	0	0	0	0	0	0	0	0	0	0	0	0	0	0	0	0	0	0	0	0	0	0	0	0
	585		0	0	0	0	0	0	0	0	0	0	1	0	0	0	0	0	0	0	0	0	0	0	0	0	0	0	0	0	0	0	0	0	0	0	0	0	0	0	0	0	0	0	0	0	0	0	0
	586		0	0	0	0	0	0	0	0	0	0	0	0	1	0	0	0	0	0	0	0	0	0	0	0	0	0	0	0	0	0	0	0	0	0	0	0	0	0	0	0	0	0	0	0	0	0	0
	587		0	0	0	0	0	0	0	0	0	0	0	0	0	0	0	0	0	0	0	0	0	0	0	0	0	0	0	0	0	0	0	0	0	0	0	0	0	0	0	0	0	0	0	0	0	0	0
	588		0	0	0	0	0	0	0	0	0	0	0	0	0	0	0	0	0	0	0	0	0	0	0	0	0	0	0	0	0	0	0	0	0	1	0	0	0	0	0	0	0	0	0	0	0	0	0
	589		0	0	0	0	0	0	0	0	0	1	0	0	0	0	0	0	0	0	0	0	0	0	0	0	0	0	0	0	0	0	0	0	0	0	0	0	0	0	0	0	0	0	0	0	0	0	0
	590		0	1	0	0	0	0	0	0	0	0	0	0	0	0	0	0	0	0	0	0	0	0	0	0	0	0	0	0	0	0	0	0	0	0	0	0	0	0	0	0	0	0	0	0	0	0	0
	591		0	0	0	0	0	0	0	0	0	0	0	0	0	0	0	0	0	0	0	0	0	0	0	0	1	0	0	0	0	0	0	0	0	0	0	0	0	0	0	0	0	0	0	0	0	0	0
	592		0	0	0	0	0	0	0	0	0	0	0	0	1	0	0	0	0	0	0	0	0	0	0	0	0	0	0	0	0	0	0	0	0	0	0	0	0	0	0	0	0	0	0	0	0	0	0
	593		0	0	0	0	0	0	0	0	0	0	0	0	0	0	0	0	0	0	0	0	0	0	0	0	0	0	0	0	0	0	0	0	0	0	0	0	0	0	0	0	0	0	0	0	0	0	0
	594		0	0	0	0	0	0	0	0	0	0	0	0	0	0	0	0	0	0	0	0	1	0	0	0	0	0	0	0	0	0	0	0	0	0	0	0	0	0	0	0	0	0	0	0	0	0	0
	595		0	0	0	0	0	0	0	0	0	0	0	0	1	0	0	0	0	0	0	0	0	0	0	0	0	0	0	0	0	0	0	0	0	0	0	0	0	0	0	0	0	0	0	0	0	0	0
	596		0	1	0	0	0	0	0	0	0	0	0	0	0	0	0	0	0	0	0	0	0	0	0	0	0	0	0	0	0	0	0	0	0	0	0	0	0	0	0	0	0	0	0	0	0	0	0
	597		0	1	0	0	0	0	0	0	0	0	0	0	0	0	0	0	0	0	0	0	0	0	0	0	0	0	0	0	0	0	0	0	0	0	0	0	0	0	0	0	0	0	0	0	0	0	0
	598		0	0	0	0	0	0	0	0	0	0	0	0	0	0	0	0	0	0	0	0	0	0	0	0	0	0	0	0	0	0	0	0	0	0	0	0	0	0	0	0	0	0	0	0	0	0	0
	599		0	0	0	0	0	0	0	0	0	0	0	0	0	0	0	0	0	0	0	0	0	0	0	0	0	0	0	0	0	0	0	0	0	0	0	0	0	0	0	0	0	0	0	0	0	0	0
	600		0	0	0	0	0	0	0	0	0	1	0	0	0	0	0	0	0	0	0	0	0	0	0	0	0	0	0	0	0	0	0	0	0	0	0	0	0	0	0	0	0	0	0	0	0	0	0
	601		0	0	0	0	0	0	0	0	0	0	1	0	0	0	0	0	0	0	0	0	0	0	0	0	0	0	0	0	0	0	0	0	0	0	0	0	0	0	0	0	0	0	0	0	0	0	0
	602		0	0	0	0	0	0	0	0	0	0	0	0	0	0	0	0	0	0	0	0	0	0	0	0	1	0	0	0	0	0	0	0	0	0	0	0	0	0	0	0	0	0	0	0	0	0	0
	603		0	0	0	0	0	0	0	0	0	0	0	0	0	0	0	0	0	0	0	0	0	0	0	0	0	0	0	0	0	0	0	0	0	0	0	0	0	0	0	0	0	0	0	0	0	0	0
	604		0	0	0	0	0	0	0	1	0	0	0	0	0	0	0	0	0	0	0	0	0	0	0	0	0	0	0	0	0	0	0	0	0	0	0	0	0	0	0	0	0	0	0	0	0	0	0
	605		0	1	0	0	0	0	0	0	0	0	0	0	0	0	0	0	0	0	0	0	0	0	0	0	0	0	0	0	0	0	0	0	0	0	0	0	0	0	0	0	0	0	0	0	0	0	0
	606		0	0	0	0	0	0	0	0	0	0	0	0	0	0	0	0	0	0	0	0	0	0	0	0	0	0	0	0	0	0	0	0	0	0	0	0	0	0	0	0	0	0	0	0	0	0	0
	607		0	0	0	0	0	0	0	0	0	0	0	0	0	0	0	0	0	0	0	0	0	0	0	0	0	0	0	0	0	0	0	0	0	0	0	0	0	0	0	0	0	0	0	0	0	1	0
	608		0	0	0	0	0	0	0	0	0	0	0	0	0	0	0	0	0	0	0	0	0	0	0	0	0	0	0	0	0	0	0	0	0	0	0	0	0	0	0	0	0	0	0	0	0	0	1
	609		0	1	0	0	0	0	0	0	0	0	0	0	0	0	0	0	0	0	0	0	0	0	0	0	0	0	0	0	0	0	0	0	0	0	0	0	0	0	0	0	0	0	0	0	0	0	0
	610		0	0	0	0	0	0	0	0	0	0	0	0	0	0	0	0	0	0	1	0	0	0	0	0	0	0	0	0	0	0	0	0	0	0	0	0	0	0	0	0	0	0	0	0	0	0	0
	611		0	0	0	0	0	0	0	0	0	1	0	0	0	0	0	0	0	0	0	0	0	0	0	0	0	0	0	0	0	0	0	0	0	0	0	0	0	0	0	0	0	0	0	0	0	0	0
	612		0	0	0	0	0	0	0	0	0	0	0	0	0	0	0	0	0	0	0	0	0	0	0	0	0	0	0	0	0	0	0	0	0	0	0	0	0	0	0	0	0	0	0	0	0	0	0
	613		0	0	0	0	0	0	0	0	0	0	0	0	0	0	0	0	0	0	0	0	0	0	0	0	0	0	0	0	0	0	0	0	0	1	0	0	0	0	0	0	0	0	0	0	0	0	0
	614		0	0	0	0	0	0	0	0	0	0	0	0	0	0	0	0	0	0	0	0	0	0	0	0	1	0	0	0	0	0	0	0	0	0	0	0	0	0	0	0	0	0	0	0	0	0	0
	615		0	0	0	0	0	0	0	0	0	0	0	0	0	0	0	0	0	0	0	0	0	0	0	0	0	0	0	0	0	0	0	0	0	0	0	0	0	0	0	0	0	0	0	0	0	0	0
	616		0	0	0	0	0	0	0	0	0	0	0	0	0	0	0	0	0	0	0	0	0	0	0	0	0	0	0	0	0	0	0	0	0	0	0	0	0	0	0	0	0	0	0	0	0	0	0
	617		0	0	0	0	0	0	0	0	0	0	0	0	0	0	0	0	0	0	0	0	0	0	0	0	0	0	0	0	0	0	0	0	0	0	1	0	0	0	0	0	0	0	0	0	0	0	0
	618		0	0	0	0	0	0	0	0	0	0	0	0	0	0	0	0	0	0	0	0	0	0	0	0	0	0	0	0	0	0	0	0	0	0	0	0	0	0	0	0	0	0	0	0	0	0	0
	619		0	0	0	0	0	0	0	0	0	0	0	0	0	0	0	0	0	0	0	0	0	0	0	0	0	0	0	0	0	0	0	0	0	0	0	0	0	0	0	0	0	0	0	0	0	0	0
	620		0	0	0	0	0	0	0	0	0	0	0	0	0	0	0	0	1	0	0	0	0	0	0	0	0	0	0	0	0	0	0	0	0	0	0	0	0	0	0	0	0	0	0	0	0	0	0
	621		0	1	0	0	0	0	0	0	0	0	0	0	0	0	0	0	0	0	0	0	0	0	0	0	0	0	0	0	0	0	0	0	0	0	0	0	0	0	0	0	0	0	0	0	0	0	0
	622		0	0	0	0	0	0	0	0	0	0	0	0	0	0	0	0	0	0	0	0	0	0	0	0	0	0	0	0	0	0	0	0	0	0	0	0	0	0	0	0	0	0	0	0	0	0	1
	623		0	1	0	0	0	0	0	0	0	0	0	0	0	0	0	0	0	0	0	0	0	0	0	0	0	0	0	0	0	0	0	0	0	0	0	0	0	0	0	0	0	0	0	0	0	0	0
	624		0	0	0	0	0	0	0	0	0	0	0	0	1	0	0	0	0	0	0	0	0	0	0	0	0	0	0	0	0	0	0	0	0	0	0	0	0	0	0	0	0	0	0	0	0	0	0
	625		0	0	0	0	0	0	0	0	0	0	0	0	0	0	0	0	0	0	0	0	0	0	0	0	0	0	0	0	0	0	0	0	0	0	0	0	0	0	0	0	0	0	0	0	0	0	0
	626		0	0	0	0	0	0	0	0	0	0	0	0	0	0	0	0	0	0	0	0	0	0	0	0	0	0	0	0	0	0	0	0	0	0	0	0	0	0	0	0	0	0	0	0	1	0	0
	627		0	1	0	0	0	0	0	0	0	0	0	0	0	0	0	0	0	0	0	0	0	0	0	0	0	0	0	0	0	0	0	0	0	0	0	0	0	0	0	0	0	0	0	0	0	0	0
	628		0	0	0	0	0	0	0	0	0	1	0	0	0	0	0	0	0	0	0	0	0	0	0	0	0	0	0	0	0	0	0	0	0	0	0	0	0	0	0	0	0	0	0	0	0	0	0
	629		0	1	0	0	0	0	0	0	0	0	0	0	0	0	0	0	0	0	0	0	0	0	0	0	0	0	0	0	0	0	0	0	0	0	0	0	0	0	0	0	0	0	0	0	0	0	0
	630		0	0	0	0	0	0	0	0	0	0	0	0	0	0	0	0	0	0	0	0	0	0	0	0	0	0	1	0	0	0	0	0	0	0	0	0	0	0	0	0	0	0	0	0	0	0	0
	631		0	0	0	0	0	0	0	0	0	0	0	0	0	0	0	0	0	0	0	0	0	0	0	0	0	0	1	0	0	0	0	0	0	0	0	0	0	0	0	0	0	0	0	0	0	0	0
	632		0	0	0	0	0	0	0	0	0	0	0	0	0	0	0	0	0	0	0	0	1	0	0	0	0	0	0	0	0	0	0	0	0	0	0	0	0	0	0	0	0	0	0	0	0	0	0
	633		0	0	0	0	0	0	0	0	0	0	0	0	0	0	0	0	0	0	0	0	0	0	0	0	0	0	0	0	0	0	0	0	0	0	0	0	0	0	0	0	0	0	0	0	0	0	1
	634		0	0	0	0	0	0	0	0	0	0	0	0	0	0	0	0	0	0	0	0	0	0	0	0	0	0	1	0	0	0	0	0	0	0	0	0	0	0	0	0	0	0	0	0	0	0	0
	635		0	0	0	0	0	0	0	0	0	0	0	0	0	0	0	0	0	0	0	0	0	0	0	0	0	0	1	0	0	0	0	0	0	0	0	0	0	0	0	0	0	0	0	0	0	0	0
	636		0	0	0	0	0	0	0	1	0	0	0	0	0	0	0	0	0	0	0	0	0	0	0	0	0	0	0	0	0	0	0	0	0	0	0	0	0	0	0	0	0	0	0	0	0	0	0
	637		0	0	0	0	0	0	0	0	0	0	0	0	0	0	0	0	0	0	0	0	0	0	0	0	0	0	1	0	0	0	0	0	0	0	0	0	0	0	0	0	0	0	0	0	0	0	0
	638		0	0	0	0	0	0	0	0	0	0	0	0	0	0	0	0	0	0	0	0	0	0	0	0	0	0	0	0	0	0	0	0	0	0	0	0	0	0	0	0	0	0	0	0	0	0	0
	639		0	0	0	0	0	0	0	0	0	0	0	0	0	0	0	0	0	0	0	0	0	0	0	0	0	0	0	0	0	0	0	0	0	0	0	0	0	0	0	0	0	0	0	0	0	0	1
	640		0	1	0	0	0	0	0	0	0	0	0	0	0	0	0	0	0	0	0	0	0	0	0	0	0	0	0	0	0	0	0	0	0	0	0	0	0	0	0	0	0	0	0	0	0	0	0
	641		1	0	0	0	0	0	0	0	0	0	0	0	0	0	0	0	0	0	0	0	0	0	0	0	0	0	0	0	0	0	0	0	0	0	0	0	0	0	0	0	0	0	0	0	0	0	0
	642		0	0	0	0	0	0	0	0	0	0	0	0	0	0	0	0	0	0	0	0	0	0	0	0	0	0	0	0	0	0	0	0	0	0	0	0	0	0	0	0	0	0	0	0	0	0	1
	643		0	0	0	0	0	0	0	0	0	0	0	0	0	0	0	0	0	0	0	0	0	0	0	0	1	0	0	0	0	0	0	0	0	0	0	0	0	0	0	0	0	0	0	0	0	0	0
	644		0	0	0	0	0	0	0	0	0	0	0	0	1	0	0	0	0	0	0	0	0	0	0	0	0	0	0	0	0	0	0	0	0	0	0	0	0	0	0	0	0	0	0	0	0	0	0
	645		0	1	0	0	0	0	0	0	0	0	0	0	0	0	0	0	0	0	0	0	0	0	0	0	0	0	0	0	0	0	0	0	0	0	0	0	0	0	0	0	0	0	0	0	0	0	0
	646		0	0	0	0	0	0	0	0	0	0	0	0	0	0	0	0	0	0	0	0	0	0	0	0	1	0	0	0	0	0	0	0	0	0	0	0	0	0	0	0	0	0	0	0	0	0	0
	647		0	0	0	0	0	0	0	0	0	0	0	0	0	0	0	0	0	0	0	0	0	0	0	0	0	0	0	0	0	0	0	0	0	0	1	0	0	0	0	0	0	0	0	0	0	0	0
	648		0	1	0	0	0	0	0	0	0	0	0	0	0	0	0	0	0	0	0	0	0	0	0	0	0	0	0	0	0	0	0	0	0	0	0	0	0	0	0	0	0	0	0	0	0	0	0
	649		0	0	0	0	0	0	0	0	0	0	0	0	0	0	0	0	0	0	0	0	0	0	0	0	0	0	0	0	0	0	0	0	0	0	0	0	0	0	0	0	0	0	1	0	0	0	0
	650		0	1	0	0	0	0	0	0	0	0	0	0	0	0	0	0	0	0	0	0	0	0	0	0	0	0	0	0	0	0	0	0	0	0	0	0	0	0	0	0	0	0	0	0	0	0	0
	651		0	0	0	0	0	0	0	0	0	0	0	0	0	0	0	0	0	0	0	0	0	0	0	0	0	0	0	0	0	0	0	0	0	0	0	0	0	0	0	0	0	0	0	0	0	0	0
	652		0	0	0	0	0	0	0	0	0	0	0	0	0	0	0	0	0	0	0	0	0	0	0	0	0	0	0	0	0	0	0	0	0	0	0	0	0	0	0	0	0	0	0	0	0	0	1
	653		0	0	0	0	0	0	0	0	0	0	0	0	0	0	0	0	0	0	0	0	0	0	0	0	0	0	0	0	0	0	0	0	0	0	0	0	0	0	0	0	0	0	0	0	0	0	0
	654		0	0	0	0	0	0	0	0	0	0	0	0	0	0	0	0	0	0	0	0	0	0	0	1	0	0	0	0	0	0	0	0	0	0	0	0	0	0	0	0	0	0	0	0	0	0	0
	655		0	0	0	0	0	0	0	0	0	0	0	0	0	0	0	0	0	0	0	0	0	0	0	0	0	0	0	0	0	0	0	0	0	0	0	0	0	0	0	0	0	0	0	0	0	0	0
	656		0	0	0	0	0	0	0	0	0	0	0	0	1	0	0	0	0	0	0	0	0	0	0	0	0	0	0	0	0	0	0	0	0	0	0	0	0	0	0	0	0	0	0	0	0	0	0
	657		0	0	0	0	0	0	0	0	0	1	0	0	0	0	0	0	0	0	0	0	0	0	0	0	0	0	0	0	0	0	0	0	0	0	0	0	0	0	0	0	0	0	0	0	0	0	0
	658		0	0	0	0	0	0	0	0	0	0	0	0	0	0	0	0	0	0	0	0	0	0	0	0	0	0	0	0	0	0	0	0	0	0	0	0	0	0	0	0	0	0	0	0	0	0	0
	659		0	0	0	0	0	0	0	0	0	0	0	0	0	0	0	0	0	0	0	0	0	0	0	0	0	0	0	0	0	0	0	0	0	0	0	0	0	0	0	0	0	0	0	0	0	0	0
	660		0	0	0	0	0	0	0	0	0	0	0	0	0	0	0	0	0	0	0	0	0	0	0	0	0	0	0	0	0	0	0	0	0	0	1	0	0	0	0	0	0	0	0	0	0	0	0
	661		0	1	0	0	0	0	0	0	0	0	0	0	0	0	0	0	0	0	0	0	0	0	0	0	0	0	0	0	0	0	0	0	0	0	0	0	0	0	0	0	0	0	0	0	0	0	0
	662		0	0	0	0	0	0	0	0	0	0	0	0	0	0	0	0	0	0	0	0	0	0	0	0	0	0	0	0	0	0	0	0	0	0	0	0	0	0	0	0	0	0	0	0	0	0	0
	663		0	0	0	0	0	0	0	0	0	0	0	0	0	0	0	0	0	0	0	0	0	0	0	0	0	0	0	0	0	0	0	0	0	0	0	0	0	0	0	0	0	0	0	0	0	1	0
	664		0	0	0	0	0	0	0	0	0	0	0	0	0	0	0	0	0	0	0	0	0	0	0	0	0	0	0	0	0	0	0	0	0	0	0	0	0	0	0	0	0	0	0	0	0	0	0
	665		0	0	0	0	0	0	0	0	0	0	0	0	0	0	0	0	0	0	0	0	0	0	0	0	0	0	0	0	0	0	0	0	0	1	0	0	0	0	0	0	0	0	0	0	0	0	0
	666		0	0	0	0	0	0	0	0	0	0	0	0	0	0	0	0	0	0	0	0	0	0	0	0	0	0	0	0	0	0	0	0	0	0	0	0	0	0	0	0	0	0	0	0	0	0	0
	667		0	0	0	0	0	0	0	1	0	0	0	0	0	0	0	0	0	0	0	0	0	0	0	0	0	0	0	0	0	0	0	0	0	0	0	0	0	0	0	0	0	0	0	0	0	0	0
	668		0	0	0	0	0	0	0	0	0	1	0	0	0	0	0	0	0	0	0	0	0	0	0	0	0	0	0	0	0	0	0	0	0	0	0	0	0	0	0	0	0	0	0	0	0	0	0
	669		0	0	0	0	0	0	0	0	0	0	0	0	0	0	0	0	0	0	0	0	0	0	0	0	0	0	0	0	0	0	0	0	0	0	0	0	0	0	0	0	0	0	0	0	0	0	0
	670		0	0	0	0	0	0	0	0	0	0	0	0	0	0	0	0	0	0	0	0	0	0	0	0	0	0	0	0	0	0	0	0	0	0	0	0	0	0	0	0	0	0	0	0	0	0	0
	671		0	0	0	0	0	0	0	0	0	0	0	0	0	0	0	0	0	0	0	0	0	0	0	0	0	0	0	0	0	0	0	0	0	0	0	0	0	0	0	0	0	0	0	0	0	0	1
	672		0	0	0	0	0	0	0	0	0	0	0	0	0	0	0	1	0	0	0	0	0	0	0	0	0	0	0	0	0	0	0	0	0	0	0	0	0	0	0	0	0	0	0	0	0	0	0
	673		0	0	0	0	0	0	0	0	0	0	0	0	0	0	0	0	0	0	0	0	0	0	0	0	1	0	0	0	0	0	0	0	0	0	0	0	0	0	0	0	0	0	0	0	0	0	0
	674		0	0	0	0	0	0	0	0	0	0	0	0	0	0	0	0	0	0	0	0	0	0	0	0	0	0	0	0	0	0	0	0	0	0	0	0	0	0	0	0	0	0	0	0	0	0	1
	675		0	0	0	0	0	0	0	0	0	0	0	0	0	0	0	0	0	0	0	0	0	0	0	0	0	0	1	0	0	0	0	0	0	0	0	0	0	0	0	0	0	0	0	0	0	0	0
	676		0	0	0	0	0	0	0	0	0	0	0	0	0	0	0	0	0	0	0	0	0	0	0	0	0	0	0	0	0	0	0	0	0	0	0	0	0	0	0	0	0	0	0	0	0	0	0
	677		0	1	0	0	0	0	0	0	0	0	0	0	0	0	0	0	0	0	0	0	0	0	0	0	0	0	0	0	0	0	0	0	0	0	0	0	0	0	0	0	0	0	0	0	0	0	0
	678		0	0	0	0	0	0	0	0	0	0	0	0	0	0	0	0	0	0	0	0	0	0	0	0	0	0	0	0	0	0	0	0	0	0	0	0	0	0	0	0	0	0	0	0	0	0	0
	679		0	0	0	0	0	0	0	0	0	0	0	0	1	0	0	0	0	0	0	0	0	0	0	0	0	0	0	0	0	0	0	0	0	0	0	0	0	0	0	0	0	0	0	0	0	0	0
	680		0	0	0	0	0	0	0	0	0	0	0	0	0	0	0	0	0	0	0	0	0	0	0	0	0	0	0	0	0	0	0	0	0	0	0	0	0	0	0	0	0	0	0	0	0	1	0
	681		0	0	0	0	0	0	0	0	0	1	0	0	0	0	0	0	0	0	0	0	0	0	0	0	0	0	0	0	0	0	0	0	0	0	0	0	0	0	0	0	0	0	0	0	0	0	0
	682		0	0	0	0	0	0	0	0	0	0	0	0	1	0	0	0	0	0	0	0	0	0	0	0	0	0	0	0	0	0	0	0	0	0	0	0	0	0	0	0	0	0	0	0	0	0	0
	683		0	0	0	0	0	0	0	0	0	0	0	0	0	0	0	0	0	0	0	0	0	0	0	0	0	0	0	0	0	0	0	0	0	0	0	0	0	0	0	0	0	0	0	0	0	0	0
	684		0	1	0	0	0	0	0	0	0	0	0	0	0	0	0	0	0	0	0	0	0	0	0	0	0	0	0	0	0	0	0	0	0	0	0	0	0	0	0	0	0	0	0	0	0	0	0
	685		0	0	0	0	0	0	0	0	0	0	0	0	0	0	0	0	0	0	0	0	0	0	0	0	0	0	0	0	0	0	0	0	0	0	0	0	0	0	0	0	0	0	0	0	0	0	1
	686		0	0	0	0	0	0	0	0	0	0	0	0	0	0	0	0	0	0	0	0	0	0	0	0	0	0	0	0	0	0	0	0	0	0	0	0	0	0	0	0	0	0	0	0	0	0	1
	687		0	0	0	0	0	0	0	0	0	0	0	0	0	0	0	0	0	0	0	0	0	0	0	0	0	0	0	0	0	0	0	0	0	0	0	0	0	0	0	0	0	0	0	0	0	0	0
	688		0	0	0	0	0	0	0	0	0	0	0	0	0	0	0	0	0	0	0	0	0	0	0	0	0	0	0	0	0	0	0	0	0	1	0	0	0	0	0	0	0	0	0	0	0	0	0
	689		0	0	0	0	0	0	0	0	0	0	0	0	0	0	0	0	0	0	0	0	0	0	0	0	0	0	0	0	0	0	0	0	0	0	0	0	0	0	0	0	0	0	0	0	0	0	0
	690		0	0	0	0	0	0	0	0	0	0	0	0	0	0	0	0	0	0	0	0	0	0	0	0	0	0	0	0	0	0	0	0	0	0	1	0	0	0	0	0	0	0	0	0	0	0	0
	691		0	1	0	0	0	0	0	0	0	0	0	0	0	0	0	0	0	0	0	0	0	0	0	0	0	0	0	0	0	0	0	0	0	0	0	0	0	0	0	0	0	0	0	0	0	0	0
	692		0	0	0	0	0	0	0	0	0	0	0	0	0	0	0	0	0	0	0	0	0	0	0	0	0	0	0	0	0	0	0	0	0	0	0	0	0	0	0	0	0	0	0	0	0	0	0
	693		0	1	0	0	0	0	0	0	0	0	0	0	0	0	0	0	0	0	0	0	0	0	0	0	0	0	0	0	0	0	0	0	0	0	0	0	0	0	0	0	0	0	0	0	0	0	0
	694		0	1	0	0	0	0	0	0	0	0	0	0	0	0	0	0	0	0	0	0	0	0	0	0	0	0	0	0	0	0	0	0	0	0	0	0	0	0	0	0	0	0	0	0	0	0	0
	695		0	0	0	0	0	0	0	0	0	0	0	0	0	0	0	0	0	0	0	0	0	0	0	0	0	0	1	0	0	0	0	0	0	0	0	0	0	0	0	0	0	0	0	0	0	0	0
	696		0	0	0	0	0	0	0	0	0	0	0	0	0	0	0	0	0	0	0	0	0	0	0	0	0	0	0	0	0	0	0	0	0	0	0	0	0	0	0	0	0	0	0	0	0	0	1
	697		0	0	0	0	0	0	0	0	0	0	0	1	0	0	0	0	0	0	0	0	0	0	0	0	0	0	0	0	0	0	0	0	0	0	0	0	0	0	0	0	0	0	0	0	0	0	0
	698		0	0	0	0	0	0	0	0	0	0	0	0	0	0	0	0	0	0	0	0	0	0	0	0	1	0	0	0	0	0	0	0	0	0	0	0	0	0	0	0	0	0	0	0	0	0	0
	699		0	1	0	0	0	0	0	0	0	0	0	0	0	0	0	0	0	0	0	0	0	0	0	0	0	0	0	0	0	0	0	0	0	0	0	0	0	0	0	0	0	0	0	0	0	0	0
	700		0	0	0	0	0	0	0	0	0	0	0	0	1	0	0	0	0	0	0	0	0	0	0	0	0	0	0	0	0	0	0	0	0	0	0	0	0	0	0	0	0	0	0	0	0	0	0
	701		0	0	0	0	0	0	0	0	0	0	0	0	0	0	0	0	0	0	0	0	0	0	0	0	0	0	0	0	0	0	0	0	0	0	0	0	0	0	0	0	0	0	0	0	0	0	0
	702		0	1	0	0	0	0	0	0	0	0	0	0	0	0	0	0	0	0	0	0	0	0	0	0	0	0	0	0	0	0	0	0	0	0	0	0	0	0	0	0	0	0	0	0	0	0	0
	703		0	0	0	0	0	0	0	0	0	0	0	0	0	0	0	0	0	0	0	0	0	0	0	0	0	0	0	0	0	0	0	0	0	0	1	0	0	0	0	0	0	0	0	0	0	0	0
	704		0	0	0	0	0	0	0	0	0	1	0	0	0	0	0	0	0	0	0	0	0	0	0	0	0	0	0	0	0	0	0	0	0	0	0	0	0	0	0	0	0	0	0	0	0	0	0
	705		0	0	0	0	0	0	0	0	0	0	0	0	1	0	0	0	0	0	0	0	0	0	0	0	0	0	0	0	0	0	0	0	0	0	0	0	0	0	0	0	0	0	0	0	0	0	0
	706		0	0	0	0	0	0	0	0	0	0	0	0	0	0	0	0	0	0	0	0	1	0	0	0	0	0	0	0	0	0	0	0	0	0	0	0	0	0	0	0	0	0	0	0	0	0	0
	707		0	0	0	0	0	0	0	0	0	0	0	1	0	0	0	0	0	0	0	0	0	0	0	0	0	0	0	0	0	0	0	0	0	0	0	0	0	0	0	0	0	0	0	0	0	0	0
	708		0	0	0	0	0	0	0	0	0	0	0	0	0	0	0	1	0	0	0	0	0	0	0	0	0	0	0	0	0	0	0	0	0	0	0	0	0	0	0	0	0	0	0	0	0	0	0
	709		0	0	0	0	0	0	0	0	0	0	0	0	0	0	0	0	0	0	0	0	0	0	0	0	0	0	0	0	0	0	0	0	0	1	0	0	0	0	0	0	0	0	0	0	0	0	0
	710		0	0	0	0	0	0	0	0	0	0	0	0	0	0	0	0	0	0	0	0	0	0	0	0	0	0	0	0	0	0	0	0	0	0	0	0	0	0	0	0	0	0	0	0	0	0	0
	711		0	0	0	0	0	0	0	0	0	0	0	0	1	0	0	0	0	0	0	0	0	0	0	0	0	0	0	0	0	0	0	0	0	0	0	0	0	0	0	0	0	0	0	0	0	0	0
	712		0	0	0	0	0	0	0	0	0	0	0	0	0	0	0	0	0	0	0	0	0	0	0	0	0	0	0	0	0	0	0	0	0	0	1	0	0	0	0	0	0	0	0	0	0	0	0
	713		0	0	0	0	0	0	0	0	0	0	0	0	0	0	0	0	0	0	0	0	0	0	0	0	1	0	0	0	0	0	0	0	0	0	0	0	0	0	0	0	0	0	0	0	0	0	0
	714		0	0	0	0	0	0	0	0	0	0	0	0	0	0	0	0	0	0	0	0	0	0	0	0	0	0	0	0	0	0	0	0	0	0	0	0	0	0	0	0	0	0	0	0	0	0	0
	715		0	0	0	0	0	0	0	0	0	0	0	0	0	0	0	0	0	0	0	0	0	0	0	0	0	0	0	0	0	0	0	0	0	0	0	0	0	0	0	0	0	0	0	0	1	0	0
	716		0	1	0	0	0	0	0	0	0	0	0	0	0	0	0	0	0	0	0	0	0	0	0	0	0	0	0	0	0	0	0	0	0	0	0	0	0	0	0	0	0	0	0	0	0	0	0
	717		0	0	0	0	0	0	0	0	0	0	1	0	0	0	0	0	0	0	0	0	0	0	0	0	0	0	0	0	0	0	0	0	0	0	0	0	0	0	0	0	0	0	0	0	0	0	0
	718		0	0	0	0	0	0	0	0	0	1	0	0	0	0	0	0	0	0	0	0	0	0	0	0	0	0	0	0	0	0	0	0	0	0	0	0	0	0	0	0	0	0	0	0	0	0	0
	719		0	0	0	0	0	0	0	0	0	1	0	0	0	0	0	0	0	0	0	0	0	0	0	0	0	0	0	0	0	0	0	0	0	0	0	0	0	0	0	0	0	0	0	0	0	0	0
	720		0	0	0	0	0	0	0	0	0	0	0	0	0	0	0	0	0	0	0	0	0	0	0	0	0	0	0	0	0	0	0	0	0	0	0	0	0	0	0	0	0	0	0	0	0	0	0
	721		0	0	0	0	0	0	0	0	0	0	0	0	0	0	0	0	0	0	0	0	0	0	0	0	0	0	0	0	0	0	0	0	0	0	0	0	0	0	0	0	0	0	0	0	0	0	0
	722		0	0	0	0	0	0	0	0	0	0	0	0	0	0	0	0	0	0	0	0	0	0	0	0	0	0	0	0	0	0	0	0	0	0	0	0	0	0	0	0	0	0	0	0	0	0	0
	723		0	1	0	0	0	0	0	0	0	0	0	0	0	0	0	0	0	0	0	0	0	0	0	0	0	0	0	0	0	0	0	0	0	0	0	0	0	0	0	0	0	0	0	0	0	0	0
	724		0	0	0	0	0	0	0	0	0	0	0	0	0	0	0	0	0	0	0	0	0	0	0	0	0	0	0	0	0	0	0	0	0	0	0	0	0	0	0	0	0	0	0	0	0	0	0
	725		0	1	0	0	0	0	0	0	0	0	0	0	0	0	0	0	0	0	0	0	0	0	0	0	0	0	0	0	0	0	0	0	0	0	0	0	0	0	0	0	0	0	0	0	0	0	0
	726		0	0	0	0	0	0	0	0	0	0	0	0	0	0	0	0	0	0	0	0	0	0	0	0	0	0	0	0	0	0	0	0	0	0	0	0	0	0	0	0	0	0	0	0	0	0	0
	727		0	0	0	0	0	0	0	0	0	0	0	0	0	0	0	0	0	0	0	0	0	0	0	0	0	0	0	0	0	0	0	0	0	0	0	0	0	0	0	0	0	0	0	0	0	0	0
	728		0	0	0	0	0	0	0	0	0	0	0	0	0	0	0	0	0	0	0	0	0	0	0	0	0	0	0	0	0	0	0	0	0	0	0	0	0	0	0	0	0	0	0	0	0	0	0
	729		0	0	0	0	0	0	0	0	0	0	0	1	0	0	0	0	0	0	0	0	0	0	0	0	0	0	0	0	0	0	0	0	0	0	0	0	0	0	0	0	0	0	0	0	0	0	0
	730		0	1	0	0	0	0	0	0	0	0	0	0	0	0	0	0	0	0	0	0	0	0	0	0	0	0	0	0	0	0	0	0	0	0	0	0	0	0	0	0	0	0	0	0	0	0	0
	731		0	0	0	0	0	0	0	0	0	0	0	0	0	0	0	0	0	0	0	0	0	0	0	0	0	0	0	0	0	0	0	0	0	0	0	0	0	0	0	0	0	0	0	0	0	0	0
	732		0	0	0	0	0	0	0	0	0	0	0	0	0	0	0	0	0	0	0	0	0	0	0	0	0	0	0	0	0	0	0	0	0	1	0	0	0	0	0	0	0	0	0	0	0	0	0
	733		0	0	0	0	0	0	0	1	0	0	0	0	0	0	0	0	0	0	0	0	0	0	0	0	0	0	0	0	0	0	0	0	0	0	0	0	0	0	0	0	0	0	0	0	0	0	0
	734		0	0	0	0	0	0	0	0	0	0	0	0	0	0	0	0	0	0	0	0	1	0	0	0	0	0	0	0	0	0	0	0	0	0	0	0	0	0	0	0	0	0	0	0	0	0	0
	735		0	0	0	0	0	0	0	0	0	0	0	0	0	0	0	0	0	0	0	0	0	0	0	0	0	0	0	0	0	0	0	0	0	0	0	0	0	0	0	0	0	0	0	0	0	0	0
	736		0	0	0	0	0	0	0	0	0	0	0	0	0	0	0	0	0	0	0	0	0	0	0	0	0	0	0	0	0	0	0	0	0	0	0	0	0	0	0	0	0	0	0	0	0	0	0
	737		0	0	0	0	0	0	0	0	0	0	0	0	0	0	0	0	0	0	0	0	0	0	0	0	0	0	1	0	0	0	0	0	0	0	0	0	0	0	0	0	0	0	0	0	0	0	0
	738		0	0	0	0	0	0	0	0	0	0	0	0	0	0	0	0	0	0	0	0	0	0	0	0	0	0	0	0	0	0	0	0	0	0	0	0	0	0	0	0	0	0	0	0	0	0	0
	739		0	0	0	0	0	0	0	0	0	0	0	0	0	0	0	0	0	0	0	0	0	0	0	0	0	0	0	0	0	0	0	0	0	0	0	0	0	0	0	0	0	0	0	0	0	0	0
	740		0	0	0	0	0	0	0	0	0	0	0	0	0	0	0	0	0	0	0	0	0	0	0	0	0	0	0	0	0	0	0	0	0	0	0	0	0	0	0	0	0	0	0	0	0	0	0
	741		0	0	0	0	0	0	0	0	0	0	0	0	1	0	0	0	0	0	0	0	0	0	0	0	0	0	0	0	0	0	0	0	0	0	0	0	0	0	0	0	0	0	0	0	0	0	0
	742		0	1	0	0	0	0	0	0	0	0	0	0	0	0	0	0	0	0	0	0	0	0	0	0	0	0	0	0	0	0	0	0	0	0	0	0	0	0	0	0	0	0	0	0	0	0	0
	743		0	0	0	0	0	0	0	0	0	0	0	0	0	0	0	0	0	0	0	0	0	0	0	0	0	0	0	0	0	0	0	0	1	0	0	0	0	0	0	0	0	0	0	0	0	0	0
	744		0	0	0	0	0	0	0	0	0	0	0	1	0	0	0	0	0	0	0	0	0	0	0	0	0	0	0	0	0	0	0	0	0	0	0	0	0	0	0	0	0	0	0	0	0	0	0
	745		0	0	0	0	0	0	0	0	0	0	0	0	0	0	0	0	0	0	0	0	0	0	0	0	0	0	1	0	0	0	0	0	0	0	0	0	0	0	0	0	0	0	0	0	0	0	0
	746		0	0	0	0	0	0	0	0	0	0	0	0	0	0	0	0	0	0	0	0	0	0	0	0	0	0	0	0	0	0	0	0	0	0	0	0	0	0	0	0	0	0	0	0	0	0	0
	747		0	0	0	0	0	0	0	0	0	0	0	0	0	0	0	0	0	0	1	0	0	0	0	0	0	0	0	0	0	0	0	0	0	0	0	0	0	0	0	0	0	0	0	0	0	0	0
	748		0	0	0	0	0	0	0	0	0	0	1	0	0	0	0	0	0	0	0	0	0	0	0	0	0	0	0	0	0	0	0	0	0	0	0	0	0	0	0	0	0	0	0	0	0	0	0
	749		0	0	0	0	0	0	0	0	0	0	0	0	0	0	0	0	0	0	0	0	0	0	0	0	0	0	0	0	0	0	0	0	0	0	0	0	0	0	0	0	0	0	0	0	0	1	0
	750		0	0	0	0	0	0	0	0	0	0	0	0	0	0	0	0	0	0	0	0	0	0	0	0	0	0	0	0	0	0	0	0	0	0	0	0	0	0	0	0	0	0	0	0	0	0	1
	751		0	0	0	0	0	0	0	0	0	0	0	0	0	0	0	0	0	0	0	0	0	0	0	0	0	0	0	0	0	0	0	0	0	0	0	0	0	0	0	0	0	0	0	0	0	0	0
	752		0	0	0	0	0	0	0	0	0	0	0	0	0	0	0	0	0	0	0	0	0	0	0	0	0	0	0	0	0	0	0	0	0	0	0	0	0	0	0	0	1	0	0	0	0	0	0
	753		0	0	0	0	0	0	0	0	0	0	0	0	0	0	0	0	0	0	0	0	0	0	0	0	0	0	0	0	0	0	0	0	0	0	0	0	0	0	0	0	0	0	0	0	0	0	1
	754		0	0	0	0	0	0	0	0	0	0	0	0	0	0	0	0	0	0	0	0	0	0	0	0	0	0	0	0	0	0	0	0	0	0	0	0	0	0	0	0	0	0	0	0	0	0	0
	755		0	0	0	0	0	0	0	0	0	0	0	0	0	0	0	0	1	0	0	0	0	0	0	0	0	0	0	0	0	0	0	0	0	0	0	0	0	0	0	0	0	0	0	0	0	0	0
	756		0	0	0	0	0	0	0	0	0	0	0	0	1	0	0	0	0	0	0	0	0	0	0	0	0	0	0	0	0	0	0	0	0	0	0	0	0	0	0	0	0	0	0	0	0	0	0
	757		0	0	0	0	0	0	0	0	0	0	0	0	0	0	0	0	0	0	0	0	0	0	0	0	0	0	0	0	0	0	0	0	0	0	0	0	0	0	0	0	0	0	0	0	1	0	0
	758		0	0	0	0	0	0	0	0	0	0	0	0	0	0	0	0	0	0	0	0	1	0	0	0	0	0	0	0	0	0	0	0	0	0	0	0	0	0	0	0	0	0	0	0	0	0	0
	759		0	0	0	0	0	0	0	0	0	0	1	0	0	0	0	0	0	0	0	0	0	0	0	0	0	0	0	0	0	0	0	0	0	0	0	0	0	0	0	0	0	0	0	0	0	0	0
	760		0	0	0	0	0	0	0	0	0	0	0	0	0	0	0	0	0	0	0	0	0	0	0	0	0	0	0	0	0	0	0	0	0	0	0	0	0	0	0	0	0	0	0	0	0	0	1
	761		0	0	0	1	0	0	0	0	0	0	0	0	0	0	0	0	0	0	0	0	0	0	0	0	0	0	0	0	0	0	0	0	0	0	0	0	0	0	0	0	0	0	0	0	0	0	0
	762		0	0	0	0	0	0	0	0	0	0	0	0	0	0	0	0	0	0	0	0	0	0	0	0	0	0	0	0	0	0	0	0	0	0	0	0	0	0	0	0	0	0	0	0	0	0	1
	763		0	0	0	0	0	0	0	0	0	0	0	0	0	0	0	0	0	0	0	0	0	0	0	0	0	0	0	0	0	0	0	0	0	0	0	0	0	0	0	0	0	0	0	1	0	0	0
	764		0	0	0	0	0	0	0	0	0	0	0	0	0	0	0	0	0	0	0	0	0	0	0	0	0	0	0	0	0	0	0	0	0	0	0	0	0	0	0	0	0	0	0	0	0	0	0
	765		0	0	0	0	0	0	0	0	0	0	0	0	1	0	0	0	0	0	0	0	0	0	0	0	0	0	0	0	0	0	0	0	0	0	0	0	0	0	0	0	0	0	0	0	0	0	0
	766		0	0	0	0	0	0	0	0	0	0	0	0	0	0	0	0	0	0	0	0	0	0	0	0	0	0	0	0	0	0	0	0	0	1	0	0	0	0	0	0	0	0	0	0	0	0	0
	767		0	0	0	0	0	0	0	0	0	0	0	0	0	0	0	0	0	0	0	0	0	0	0	0	0	0	0	0	0	0	0	0	0	0	0	0	0	0	0	0	0	0	0	0	0	0	0
	768		0	0	0	0	0	0	0	0	0	0	0	0	0	0	0	0	0	0	0	0	0	0	0	0	0	0	0	0	0	0	0	0	0	0	0	0	0	0	0	0	0	0	0	0	0	0	0
	769		0	0	0	0	0	0	0	0	0	0	0	0	1	0	0	0	0	0	0	0	0	0	0	0	0	0	0	0	0	0	0	0	0	0	0	0	0	0	0	0	0	0	0	0	0	0	0
	770		0	0	0	0	0	0	0	0	0	0	0	0	0	0	0	0	0	0	0	0	0	0	0	0	0	0	0	0	0	0	0	0	0	0	0	0	0	0	0	0	0	0	0	1	0	0	0
	771		0	0	0	0	0	0	0	0	0	0	0	0	0	0	0	0	0	0	0	0	0	0	0	0	0	0	0	0	0	0	0	0	0	0	1	0	0	0	0	0	0	0	0	0	0	0	0
	772		0	0	0	0	0	0	0	0	0	0	0	0	0	0	0	0	0	0	0	0	0	0	0	0	0	0	0	0	0	0	0	0	0	0	1	0	0	0	0	0	0	0	0	0	0	0	0
	773		0	0	0	0	0	0	0	0	0	0	0	0	0	0	0	0	0	0	0	0	0	0	0	0	0	0	0	0	0	0	0	0	0	0	0	0	0	0	0	0	0	0	0	0	0	0	0
	774		0	0	0	0	0	0	0	0	0	0	0	0	0	0	0	0	0	0	0	0	0	0	0	0	0	0	0	0	0	0	0	0	0	0	0	0	0	0	0	0	0	0	0	0	0	0	1
	775		0	0	0	0	0	0	0	0	0	0	0	0	0	0	0	0	0	0	0	0	0	0	0	0	0	0	0	0	0	0	0	0	0	1	0	0	0	0	0	0	0	0	0	0	0	0	0
	776		0	0	0	0	0	0	0	0	0	0	0	0	0	0	0	0	0	0	0	0	0	0	0	0	0	0	0	0	0	0	0	0	0	0	1	0	0	0	0	0	0	0	0	0	0	0	0
	777		0	0	0	0	0	0	0	0	0	0	0	0	0	0	0	0	0	0	0	0	0	0	0	0	0	0	0	0	0	0	0	0	0	0	1	0	0	0	0	0	0	0	0	0	0	0	0
	778		0	0	0	0	0	0	0	0	0	0	0	0	0	0	0	0	0	0	0	0	0	0	0	0	0	0	0	0	0	0	0	0	0	0	0	0	0	0	0	0	0	0	0	1	0	0	0
	779		0	1	0	0	0	0	0	0	0	0	0	0	0	0	0	0	0	0	0	0	0	0	0	0	0	0	0	0	0	0	0	0	0	0	0	0	0	0	0	0	0	0	0	0	0	0	0
	780		0	0	0	0	0	0	0	0	0	1	0	0	0	0	0	0	0	0	0	0	0	0	0	0	0	0	0	0	0	0	0	0	0	0	0	0	0	0	0	0	0	0	0	0	0	0	0
	781		0	0	0	0	0	0	0	1	0	0	0	0	0	0	0	0	0	0	0	0	0	0	0	0	0	0	0	0	0	0	0	0	0	0	0	0	0	0	0	0	0	0	0	0	0	0	0
	782		0	0	0	0	0	0	0	0	0	0	0	0	0	0	0	0	0	0	0	0	0	0	0	0	0	0	0	0	0	0	0	0	0	0	0	0	0	0	0	0	0	0	0	0	0	0	0
	783		0	0	0	0	0	0	0	0	1	0	0	0	0	0	0	0	0	0	0	0	0	0	0	0	0	0	0	0	0	0	0	0	0	0	0	0	0	0	0	0	0	0	0	0	0	0	0
	784		0	0	0	0	0	0	0	0	0	0	0	0	0	0	0	0	0	0	0	0	0	0	0	0	0	0	0	0	0	0	0	0	0	0	0	0	0	0	0	0	0	0	0	0	0	0	0
	785		0	0	0	0	0	0	0	0	0	0	0	0	1	0	0	0	0	0	0	0	0	0	0	0	0	0	0	0	0	0	0	0	0	0	0	0	0	0	0	0	0	0	0	0	0	0	0
	786		0	1	0	0	0	0	0	0	0	0	0	0	0	0	0	0	0	0	0	0	0	0	0	0	0	0	0	0	0	0	0	0	0	0	0	0	0	0	0	0	0	0	0	0	0	0	0
	787		0	0	0	0	0	0	0	0	0	0	0	0	0	0	0	0	0	0	0	0	0	0	0	0	0	0	0	0	0	0	0	0	0	0	0	0	0	0	0	0	0	0	0	0	0	0	0
	788		0	1	0	0	0	0	0	0	0	0	0	0	0	0	0	0	0	0	0	0	0	0	0	0	0	0	0	0	0	0	0	0	0	0	0	0	0	0	0	0	0	0	0	0	0	0	0
	789		0	0	0	0	0	0	0	0	0	0	0	0	0	0	0	0	0	0	0	0	0	0	0	0	0	0	0	0	0	0	0	0	0	0	0	0	0	0	0	0	0	0	0	0	0	0	0
	790		0	1	0	0	0	0	0	0	0	0	0	0	0	0	0	0	0	0	0	0	0	0	0	0	0	0	0	0	0	0	0	0	0	0	0	0	0	0	0	0	0	0	0	0	0	0	0
	791		0	0	0	0	0	0	0	0	0	0	0	0	0	0	0	0	0	0	0	0	0	0	0	0	1	0	0	0	0	0	0	0	0	0	0	0	0	0	0	0	0	0	0	0	0	0	0
	792		0	0	0	0	0	0	0	0	0	1	0	0	0	0	0	0	0	0	0	0	0	0	0	0	0	0	0	0	0	0	0	0	0	0	0	0	0	0	0	0	0	0	0	0	0	0	0
	793		0	0	0	0	0	0	0	0	0	0	0	0	0	0	0	0	0	0	0	0	0	0	0	0	0	0	1	0	0	0	0	0	0	0	0	0	0	0	0	0	0	0	0	0	0	0	0
	794		0	0	0	0	0	0	0	1	0	0	0	0	0	0	0	0	0	0	0	0	0	0	0	0	0	0	0	0	0	0	0	0	0	0	0	0	0	0	0	0	0	0	0	0	0	0	0
	795		0	0	0	0	0	0	0	0	0	0	0	0	1	0	0	0	0	0	0	0	0	0	0	0	0	0	0	0	0	0	0	0	0	0	0	0	0	0	0	0	0	0	0	0	0	0	0
	796		0	0	0	0	0	0	0	0	0	0	0	0	0	0	0	0	0	0	0	0	0	0	0	0	0	0	0	0	0	0	0	0	0	0	0	0	0	0	0	0	1	0	0	0	0	0	0
	797		0	0	0	0	0	0	0	0	0	0	0	0	0	0	0	0	0	0	0	0	0	0	0	0	0	0	0	0	0	0	0	0	0	0	0	0	0	0	0	0	0	0	0	0	0	0	0
	798		0	0	0	0	0	0	0	0	0	0	0	0	0	0	0	0	0	0	0	0	0	0	0	0	0	0	0	0	0	0	0	0	0	0	0	0	0	0	0	0	0	0	0	0	0	0	0
	799		0	0	0	0	0	0	0	0	0	0	0	1	0	0	0	0	0	0	0	0	0	0	0	0	0	0	0	0	0	0	0	0	0	0	0	0	0	0	0	0	0	0	0	0	0	0	0
	800		0	0	0	0	0	0	0	0	0	0	0	0	0	0	0	0	0	0	1	0	0	0	0	0	0	0	0	0	0	0	0	0	0	0	0	0	0	0	0	0	0	0	0	0	0	0	0
	801		0	0	0	0	0	0	0	0	0	0	0	0	0	0	0	0	0	0	0	0	0	0	0	0	0	0	0	0	0	0	0	0	0	0	0	0	0	0	0	0	0	0	0	0	0	0	0
	802		0	0	0	0	0	0	0	0	0	0	0	0	0	0	0	0	0	0	0	0	0	0	0	0	1	0	0	0	0	0	0	0	0	0	0	0	0	0	0	0	0	0	0	0	0	0	0
	803		0	0	0	0	0	0	0	0	0	0	0	0	0	0	0	0	0	0	0	0	0	0	0	0	0	0	0	0	0	0	0	0	0	0	0	0	0	0	0	0	0	0	0	0	0	0	0
	804		0	0	0	0	0	0	0	0	0	1	0	0	0	0	0	0	0	0	0	0	0	0	0	0	0	0	0	0	0	0	0	0	0	0	0	0	0	0	0	0	0	0	0	0	0	0	0
	805		0	0	0	0	0	0	0	0	0	0	0	0	0	0	0	0	0	0	0	0	0	0	0	0	1	0	0	0	0	0	0	0	0	0	0	0	0	0	0	0	0	0	0	0	0	0	0
	806		0	0	0	0	0	0	0	0	0	0	0	0	0	0	0	0	0	0	0	0	0	0	0	0	0	0	0	0	0	0	0	0	0	0	0	0	0	0	0	0	0	0	0	0	0	0	0
	807		0	0	0	0	0	0	0	0	0	0	0	1	0	0	0	0	0	0	0	0	0	0	0	0	0	0	0	0	0	0	0	0	0	0	0	0	0	0	0	0	0	0	0	0	0	0	0
	808		0	0	0	0	0	0	0	0	0	0	0	0	0	0	0	0	0	0	0	0	0	0	0	0	0	0	0	0	0	0	0	0	0	0	0	0	0	0	0	0	0	0	0	0	0	0	0
	809		0	0	0	0	0	0	0	1	0	0	0	0	0	0	0	0	0	0	0	0	0	0	0	0	0	0	0	0	0	0	0	0	0	0	0	0	0	0	0	0	0	0	0	0	0	0	0
	810		0	0	0	0	0	0	0	1	0	0	0	0	0	0	0	0	0	0	0	0	0	0	0	0	0	0	0	0	0	0	0	0	0	0	0	0	0	0	0	0	0	0	0	0	0	0	0
	811		0	0	0	0	0	0	0	0	0	0	0	0	0	0	0	0	0	0	0	0	0	0	0	0	0	0	0	0	0	0	0	0	0	0	0	0	0	0	0	0	0	0	0	1	0	0	0
	812		0	0	0	0	0	0	0	0	0	0	0	0	0	0	0	0	0	0	0	0	0	0	0	0	0	0	0	0	0	0	0	0	0	0	0	0	0	0	0	0	0	0	0	0	0	0	0
	813		0	0	0	0	0	0	0	0	0	0	0	0	0	0	0	0	0	0	0	0	0	0	0	0	0	0	0	0	0	0	0	0	0	0	0	0	0	0	0	0	0	0	0	0	0	0	1
	814		0	0	0	0	0	0	0	0	0	0	0	0	0	0	0	0	0	0	0	0	0	0	0	0	0	0	0	0	0	0	0	0	0	0	1	0	0	0	0	0	0	0	0	0	0	0	0
	815		0	0	0	0	0	0	0	0	0	0	0	1	0	0	0	0	0	0	0	0	0	0	0	0	0	0	0	0	0	0	0	0	0	0	0	0	0	0	0	0	0	0	0	0	0	0	0
	816		0	0	0	0	0	0	0	0	0	0	0	0	0	0	0	0	0	0	0	0	0	0	0	0	0	0	0	0	0	0	0	0	0	0	0	0	0	0	0	0	0	0	0	0	0	0	0
	817		0	1	0	0	0	0	0	0	0	0	0	0	0	0	0	0	0	0	0	0	0	0	0	0	0	0	0	0	0	0	0	0	0	0	0	0	0	0	0	0	0	0	0	0	0	0	0
	818		0	1	0	0	0	0	0	0	0	0	0	0	0	0	0	0	0	0	0	0	0	0	0	0	0	0	0	0	0	0	0	0	0	0	0	0	0	0	0	0	0	0	0	0	0	0	0
	819		0	0	0	0	0	0	0	1	0	0	0	0	0	0	0	0	0	0	0	0	0	0	0	0	0	0	0	0	0	0	0	0	0	0	0	0	0	0	0	0	0	0	0	0	0	0	0
	820		0	0	0	0	0	0	0	0	0	0	0	0	0	0	0	0	0	0	0	0	0	0	0	0	0	0	0	0	0	0	0	0	0	0	1	0	0	0	0	0	0	0	0	0	0	0	0
	821		1	0	0	0	0	0	0	0	0	0	0	0	0	0	0	0	0	0	0	0	0	0	0	0	0	0	0	0	0	0	0	0	0	0	0	0	0	0	0	0	0	0	0	0	0	0	0
	822		0	0	0	0	0	0	0	0	0	0	0	0	0	0	0	0	0	0	0	0	0	0	0	0	0	0	0	0	0	0	0	0	0	0	0	0	0	0	0	0	0	0	0	0	0	0	0
	823		0	0	0	0	0	0	0	0	0	0	0	0	0	0	0	0	0	0	0	0	0	0	0	0	0	0	1	0	0	0	0	0	0	0	0	0	0	0	0	0	0	0	0	0	0	0	0
	824		0	0	0	0	0	0	0	0	0	0	0	0	0	0	0	0	0	0	0	0	0	0	0	0	0	0	0	0	0	0	0	0	0	1	0	0	0	0	0	0	0	0	0	0	0	0	0
	825		0	0	0	0	0	0	0	0	0	0	0	0	0	0	0	0	0	0	0	0	0	0	0	1	0	0	0	0	0	0	0	0	0	0	0	0	0	0	0	0	0	0	0	0	0	0	0
	826		0	0	0	0	0	0	0	0	0	0	0	0	0	0	0	0	0	0	0	0	1	0	0	0	0	0	0	0	0	0	0	0	0	0	0	0	0	0	0	0	0	0	0	0	0	0	0
	827		0	0	0	0	0	0	0	1	0	0	0	0	0	0	0	0	0	0	0	0	0	0	0	0	0	0	0	0	0	0	0	0	0	0	0	0	0	0	0	0	0	0	0	0	0	0	0
	828		0	0	0	0	0	0	0	0	0	1	0	0	0	0	0	0	0	0	0	0	0	0	0	0	0	0	0	0	0	0	0	0	0	0	0	0	0	0	0	0	0	0	0	0	0	0	0
	829		0	0	0	0	0	0	0	0	0	0	0	0	0	0	0	0	1	0	0	0	0	0	0	0	0	0	0	0	0	0	0	0	0	0	0	0	0	0	0	0	0	0	0	0	0	0	0
	830		0	0	0	0	0	0	0	0	0	0	0	0	0	0	0	0	0	0	0	0	0	0	0	0	0	0	0	0	0	0	0	0	0	0	0	0	0	0	0	0	0	0	0	0	0	0	0
	831		0	0	0	0	0	0	0	0	0	0	0	0	1	0	0	0	0	0	0	0	0	0	0	0	0	0	0	0	0	0	0	0	0	0	0	0	0	0	0	0	0	0	0	0	0	0	0
	832		0	0	0	0	0	0	0	0	0	1	0	0	0	0	0	0	0	0	0	0	0	0	0	0	0	0	0	0	0	0	0	0	0	0	0	0	0	0	0	0	0	0	0	0	0	0	0
	833		0	1	0	0	0	0	0	0	0	0	0	0	0	0	0	0	0	0	0	0	0	0	0	0	0	0	0	0	0	0	0	0	0	0	0	0	0	0	0	0	0	0	0	0	0	0	0
	834		0	1	0	0	0	0	0	0	0	0	0	0	0	0	0	0	0	0	0	0	0	0	0	0	0	0	0	0	0	0	0	0	0	0	0	0	0	0	0	0	0	0	0	0	0	0	0
	835		0	0	0	0	0	0	0	0	0	0	0	0	0	0	0	0	1	0	0	0	0	0	0	0	0	0	0	0	0	0	0	0	0	0	0	0	0	0	0	0	0	0	0	0	0	0	0
	836		0	0	0	0	0	0	0	0	0	0	0	0	0	0	0	0	0	0	0	0	0	0	0	0	0	0	0	0	0	0	0	0	0	0	1	0	0	0	0	0	0	0	0	0	0	0	0
	837		0	0	0	0	0	0	0	0	0	0	0	0	0	0	0	0	0	0	0	0	0	0	0	0	0	0	0	0	0	0	0	0	0	0	1	0	0	0	0	0	0	0	0	0	0	0	0
	838		0	0	0	0	0	0	0	0	0	0	0	0	0	0	0	0	0	0	0	0	0	0	0	0	0	0	0	0	0	0	0	0	0	0	0	0	0	0	0	0	0	0	0	0	0	0	0
	839		0	1	0	0	0	0	0	0	0	0	0	0	0	0	0	0	0	0	0	0	0	0	0	0	0	0	0	0	0	0	0	0	0	0	0	0	0	0	0	0	0	0	0	0	0	0	0
	840		0	0	0	0	0	0	0	0	0	0	0	0	0	0	0	0	0	0	0	0	0	0	0	0	0	0	0	0	0	0	0	0	0	0	0	0	0	0	0	0	0	0	0	0	0	0	0
	841		0	1	0	0	0	0	0	0	0	0	0	0	0	0	0	0	0	0	0	0	0	0	0	0	0	0	0	0	0	0	0	0	0	0	0	0	0	0	0	0	0	0	0	0	0	0	0
	842		0	0	0	0	0	0	0	0	0	0	0	0	0	0	0	0	0	0	0	0	0	0	0	0	1	0	0	0	0	0	0	0	0	0	0	0	0	0	0	0	0	0	0	0	0	0	0
	843		0	1	0	0	0	0	0	0	0	0	0	0	0	0	0	0	0	0	0	0	0	0	0	0	0	0	0	0	0	0	0	0	0	0	0	0	0	0	0	0	0	0	0	0	0	0	0
	844		0	0	0	0	0	0	0	0	0	0	0	1	0	0	0	0	0	0	0	0	0	0	0	0	0	0	0	0	0	0	0	0	0	0	0	0	0	0	0	0	0	0	0	0	0	0	0
	845		0	0	0	0	0	0	0	0	0	0	0	0	0	0	0	0	0	0	0	0	0	0	0	0	0	0	0	0	0	0	0	0	0	0	0	0	0	0	0	0	0	0	0	0	0	0	0
	846		0	0	0	0	0	0	0	0	0	0	0	0	0	0	0	0	0	0	1	0	0	0	0	0	0	0	0	0	0	0	0	0	0	0	0	0	0	0	0	0	0	0	0	0	0	0	0
	847		0	0	0	0	0	0	0	0	0	0	0	0	0	0	0	0	0	0	0	0	0	0	0	0	0	0	1	0	0	0	0	0	0	0	0	0	0	0	0	0	0	0	0	0	0	0	0
	848		0	0	0	0	0	0	0	0	0	0	0	0	0	0	0	0	0	0	0	0	0	0	0	0	0	0	0	0	0	0	0	0	0	0	0	0	0	0	0	0	0	0	0	0	0	0	0
	849		0	1	0	0	0	0	0	0	0	0	0	0	0	0	0	0	0	0	0	0	0	0	0	0	0	0	0	0	0	0	0	0	0	0	0	0	0	0	0	0	0	0	0	0	0	0	0
	850		0	0	1	0	0	0	0	0	0	0	0	0	0	0	0	0	0	0	0	0	0	0	0	0	0	0	0	0	0	0	0	0	0	0	0	0	0	0	0	0	0	0	0	0	0	0	0
	851		0	1	0	0	0	0	0	0	0	0	0	0	0	0	0	0	0	0	0	0	0	0	0	0	0	0	0	0	0	0	0	0	0	0	0	0	0	0	0	0	0	0	0	0	0	0	0
	852		0	0	0	0	0	0	0	1	0	0	0	0	0	0	0	0	0	0	0	0	0	0	0	0	0	0	0	0	0	0	0	0	0	0	0	0	0	0	0	0	0	0	0	0	0	0	0
	853		0	0	0	0	0	0	0	0	0	0	0	0	0	0	0	0	0	0	0	0	0	0	0	0	0	0	0	0	0	0	0	0	0	0	0	0	0	0	0	0	0	0	0	0	0	0	0
	854		0	0	0	0	0	0	0	0	0	0	0	0	0	0	0	0	0	0	0	0	0	0	0	1	0	0	0	0	0	0	0	0	0	0	0	0	0	0	0	0	0	0	0	0	0	0	0
	855		0	0	0	0	0	0	0	0	0	0	0	0	1	0	0	0	0	0	0	0	0	0	0	0	0	0	0	0	0	0	0	0	0	0	0	0	0	0	0	0	0	0	0	0	0	0	0
	856		0	0	0	0	0	0	0	0	0	0	0	0	0	0	0	0	0	0	0	0	1	0	0	0	0	0	0	0	0	0	0	0	0	0	0	0	0	0	0	0	0	0	0	0	0	0	0
	857		0	0	0	0	0	0	0	0	0	0	0	0	0	0	0	0	0	0	0	0	0	0	0	0	0	0	0	0	0	0	0	0	0	0	0	0	0	0	0	0	0	0	0	0	0	0	0
	858		0	0	0	0	0	0	0	0	0	0	1	0	0	0	0	0	0	0	0	0	0	0	0	0	0	0	0	0	0	0	0	0	0	0	0	0	0	0	0	0	0	0	0	0	0	0	0
	859		0	0	0	0	0	0	0	0	0	0	0	0	0	0	0	0	0	0	0	0	0	0	0	0	0	0	0	0	0	0	0	0	0	1	0	0	0	0	0	0	0	0	0	0	0	0	0
	860		0	0	0	0	0	0	0	0	0	0	0	0	0	0	0	0	0	0	0	0	0	0	0	0	0	0	1	0	0	0	0	0	0	0	0	0	0	0	0	0	0	0	0	0	0	0	0
	861		0	0	0	0	0	0	0	0	0	0	0	0	0	0	0	1	0	0	0	0	0	0	0	0	0	0	0	0	0	0	0	0	0	0	0	0	0	0	0	0	0	0	0	0	0	0	0
	862		0	0	0	0	0	0	0	0	0	0	0	0	0	0	0	0	0	0	0	0	0	0	0	0	0	0	0	0	0	0	0	0	0	1	0	0	0	0	0	0	0	0	0	0	0	0	0
	863		0	0	0	0	0	0	0	0	0	0	0	1	0	0	0	0	0	0	0	0	0	0	0	0	0	0	0	0	0	0	0	0	0	0	0	0	0	0	0	0	0	0	0	0	0	0	0
	864		0	0	0	0	0	0	0	0	0	0	0	0	0	0	0	0	0	0	0	0	0	0	0	0	0	0	1	0	0	0	0	0	0	0	0	0	0	0	0	0	0	0	0	0	0	0	0
	865		0	0	0	0	0	0	0	0	0	0	0	0	0	0	0	0	0	0	0	0	0	0	0	0	0	0	1	0	0	0	0	0	0	0	0	0	0	0	0	0	0	0	0	0	0	0	0
	866		0	0	1	0	0	0	0	0	0	0	0	0	0	0	0	0	0	0	0	0	0	0	0	0	0	0	0	0	0	0	0	0	0	0	0	0	0	0	0	0	0	0	0	0	0	0	0
	867		0	0	0	0	0	0	0	0	0	0	0	0	0	0	0	0	0	0	0	0	0	0	0	0	0	0	0	0	0	0	0	0	0	0	0	0	0	0	0	0	0	0	0	0	0	0	0
	868		0	0	0	0	0	0	0	0	0	1	0	0	0	0	0	0	0	0	0	0	0	0	0	0	0	0	0	0	0	0	0	0	0	0	0	0	0	0	0	0	0	0	0	0	0	0	0
	869		0	0	0	0	0	0	0	0	0	0	0	0	0	0	0	0	0	0	0	0	0	0	0	0	0	0	0	0	0	0	0	0	0	0	0	0	0	0	0	0	0	0	0	0	0	0	0
	870		0	0	0	0	0	0	0	0	0	0	0	0	0	0	0	0	0	0	0	0	0	0	0	0	0	0	0	0	0	0	0	0	0	1	0	0	0	0	0	0	0	0	0	0	0	0	0
	871		0	0	0	0	0	0	0	0	0	0	0	0	0	0	0	1	0	0	0	0	0	0	0	0	0	0	0	0	0	0	0	0	0	0	0	0	0	0	0	0	0	0	0	0	0	0	0
	872		0	0	0	0	0	0	0	0	0	0	0	0	1	0	0	0	0	0	0	0	0	0	0	0	0	0	0	0	0	0	0	0	0	0	0	0	0	0	0	0	0	0	0	0	0	0	0
	873		0	0	0	0	0	0	0	0	0	0	0	0	0	0	0	0	0	0	0	0	0	0	0	0	1	0	0	0	0	0	0	0	0	0	0	0	0	0	0	0	0	0	0	0	0	0	0
	874		0	0	0	0	0	0	0	0	0	0	1	0	0	0	0	0	0	0	0	0	0	0	0	0	0	0	0	0	0	0	0	0	0	0	0	0	0	0	0	0	0	0	0	0	0	0	0
	875		0	0	0	0	0	0	0	0	0	0	0	0	0	0	0	0	0	0	0	0	1	0	0	0	0	0	0	0	0	0	0	0	0	0	0	0	0	0	0	0	0	0	0	0	0	0	0
	876		0	0	0	0	0	0	0	0	0	0	0	1	0	0	0	0	0	0	0	0	0	0	0	0	0	0	0	0	0	0	0	0	0	0	0	0	0	0	0	0	0	0	0	0	0	0	0
	877		0	0	0	0	0	0	0	0	0	0	0	0	0	0	0	0	0	0	0	0	1	0	0	0	0	0	0	0	0	0	0	0	0	0	0	0	0	0	0	0	0	0	0	0	0	0	0
	878		0	0	0	0	0	0	0	0	0	0	0	0	0	0	0	0	0	0	0	0	0	0	0	0	0	0	0	0	0	0	0	0	0	0	0	0	0	0	0	0	0	0	0	0	0	0	0
	879		0	0	0	0	0	0	0	0	0	0	1	0	0	0	0	0	0	0	0	0	0	0	0	0	0	0	0	0	0	0	0	0	0	0	0	0	0	0	0	0	0	0	0	0	0	0	0
	880		0	0	0	0	0	0	0	0	0	0	0	0	0	0	0	0	0	0	0	0	0	0	0	0	0	0	0	0	0	0	0	0	0	0	0	0	0	0	0	0	0	0	0	0	0	0	1
	881		0	0	0	0	0	1	0	0	0	0	0	0	0	0	0	0	0	0	0	0	0	0	0	0	0	0	0	0	0	0	0	0	0	0	0	0	0	0	0	0	0	0	0	0	0	0	0
	882		0	1	0	0	0	0	0	0	0	0	0	0	0	0	0	0	0	0	0	0	0	0	0	0	0	0	0	0	0	0	0	0	0	0	0	0	0	0	0	0	0	0	0	0	0	0	0
	883		0	1	0	0	0	0	0	0	0	0	0	0	0	0	0	0	0	0	0	0	0	0	0	0	0	0	0	0	0	0	0	0	0	0	0	0	0	0	0	0	0	0	0	0	0	0	0
	884		0	0	0	0	0	0	0	0	0	1	0	0	0	0	0	0	0	0	0	0	0	0	0	0	0	0	0	0	0	0	0	0	0	0	0	0	0	0	0	0	0	0	0	0	0	0	0
	885		0	0	0	0	0	0	0	0	0	0	0	0	0	0	0	0	0	0	0	0	0	0	0	0	1	0	0	0	0	0	0	0	0	0	0	0	0	0	0	0	0	0	0	0	0	0	0
	886		0	1	0	0	0	0	0	0	0	0	0	0	0	0	0	0	0	0	0	0	0	0	0	0	0	0	0	0	0	0	0	0	0	0	0	0	0	0	0	0	0	0	0	0	0	0	0
	887		0	0	0	0	0	0	0	0	0	0	0	0	0	0	0	0	0	0	0	0	0	0	0	0	1	0	0	0	0	0	0	0	0	0	0	0	0	0	0	0	0	0	0	0	0	0	0
	888		0	1	0	0	0	0	0	0	0	0	0	0	0	0	0	0	0	0	0	0	0	0	0	0	0	0	0	0	0	0	0	0	0	0	0	0	0	0	0	0	0	0	0	0	0	0	0
	889		0	1	0	0	0	0	0	0	0	0	0	0	0	0	0	0	0	0	0	0	0	0	0	0	0	0	0	0	0	0	0	0	0	0	0	0	0	0	0	0	0	0	0	0	0	0	0
	890		0	0	0	0	0	0	0	0	0	0	0	0	0	0	0	0	0	0	0	0	0	0	0	0	0	0	0	0	0	0	0	1	0	0	0	0	0	0	0	0	0	0	0	0	0	0	0
	891		0	0	0	0	0	0	0	0	0	0	0	0	0	0	0	0	0	0	0	0	0	0	0	0	0	0	0	0	0	0	0	0	0	0	0	0	0	0	0	0	0	0	0	1	0	0	0
	892		0	0	0	0	0	0	0	0	0	0	0	0	1	0	0	0	0	0	0	0	0	0	0	0	0	0	0	0	0	0	0	0	0	0	0	0	0	0	0	0	0	0	0	0	0	0	0
	893		0	0	0	0	0	0	0	0	0	0	0	0	1	0	0	0	0	0	0	0	0	0	0	0	0	0	0	0	0	0	0	0	0	0	0	0	0	0	0	0	0	0	0	0	0	0	0
	894		0	0	0	0	0	0	0	0	0	0	0	0	0	0	0	0	0	0	0	0	0	0	0	0	0	0	0	0	0	0	0	0	0	0	0	0	0	0	0	0	0	0	0	0	0	0	0
	895		0	0	0	0	0	0	0	0	0	0	0	0	0	0	0	0	0	0	0	0	0	0	0	0	0	0	0	0	0	0	0	0	0	0	0	0	0	0	0	0	0	0	0	0	0	1	0
	896		0	0	0	0	0	0	0	0	0	0	0	0	0	0	0	0	0	0	0	0	0	0	0	0	0	0	0	0	0	0	0	0	0	0	0	0	0	0	0	0	0	0	0	0	0	0	0
	897		0	0	0	0	0	0	0	0	0	0	0	0	0	0	0	0	0	0	0	0	1	0	0	0	0	0	0	0	0	0	0	0	0	0	0	0	0	0	0	0	0	0	0	0	0	0	0
	898		0	0	0	0	0	0	0	0	0	0	0	0	1	0	0	0	0	0	0	0	0	0	0	0	0	0	0	0	0	0	0	0	0	0	0	0	0	0	0	0	0	0	0	0	0	0	0
	899		0	0	0	0	0	0	0	0	0	0	0	0	0	0	0	0	0	0	0	0	0	0	0	0	0	0	0	0	0	0	0	0	0	0	0	0	0	0	0	0	0	0	0	0	0	0	0
	900		0	0	0	0	0	0	0	0	0	0	0	0	0	0	0	0	0	0	0	0	1	0	0	0	0	0	0	0	0	0	0	0	0	0	0	0	0	0	0	0	0	0	0	0	0	0	0
	901		0	0	0	0	0	0	0	0	0	0	0	0	0	0	0	1	0	0	0	0	0	0	0	0	0	0	0	0	0	0	0	0	0	0	0	0	0	0	0	0	0	0	0	0	0	0	0
	902		0	0	0	0	0	0	0	0	0	0	0	0	0	0	0	0	0	0	0	0	0	0	0	0	0	0	0	0	0	0	0	0	0	0	0	0	0	0	0	0	0	0	0	0	0	1	0
	903		0	0	0	0	0	0	0	0	0	0	0	0	0	0	0	0	0	0	0	0	0	0	0	0	0	0	0	0	0	0	0	0	0	0	0	0	0	0	0	0	0	0	0	0	0	1	0
	904		0	0	0	0	0	0	0	0	0	0	0	0	0	0	0	0	1	0	0	0	0	0	0	0	0	0	0	0	0	0	0	0	0	0	0	0	0	0	0	0	0	0	0	0	0	0	0
	905		0	0	1	0	0	0	0	0	0	0	0	0	0	0	0	0	0	0	0	0	0	0	0	0	0	0	0	0	0	0	0	0	0	0	0	0	0	0	0	0	0	0	0	0	0	0	0
	906		0	0	0	0	0	0	0	0	0	1	0	0	0	0	0	0	0	0	0	0	0	0	0	0	0	0	0	0	0	0	0	0	0	0	0	0	0	0	0	0	0	0	0	0	0	0	0
	907		0	0	0	0	0	0	0	0	0	0	0	0	0	0	0	0	1	0	0	0	0	0	0	0	0	0	0	0	0	0	0	0	0	0	0	0	0	0	0	0	0	0	0	0	0	0	0
	908		0	0	0	0	0	0	0	0	0	0	0	0	0	0	0	0	0	0	0	0	0	0	0	0	0	0	0	0	0	0	0	0	0	0	0	0	0	0	0	0	0	0	0	0	0	0	0
	909		0	0	0	0	0	0	0	0	0	0	0	0	0	0	0	0	0	0	0	0	1	0	0	0	0	0	0	0	0	0	0	0	0	0	0	0	0	0	0	0	0	0	0	0	0	0	0
	910		0	0	0	0	0	0	0	0	0	0	0	0	0	0	0	0	0	0	0	0	0	0	0	0	0	0	0	0	0	0	0	0	0	0	0	0	0	0	0	0	0	0	0	0	0	0	0
	911		0	0	0	0	0	0	0	0	0	0	0	0	0	0	0	0	0	0	0	0	0	0	0	0	0	0	0	0	0	0	0	0	0	1	0	0	0	0	0	0	0	0	0	0	0	0	0
	912		0	0	0	0	0	0	0	0	0	0	0	0	0	0	0	0	0	0	0	0	0	0	0	0	0	0	0	0	0	0	0	0	0	0	0	0	0	0	0	0	0	0	0	0	0	0	1
	913		0	0	0	0	0	0	0	0	0	0	0	0	0	0	0	0	0	0	0	0	0	0	0	0	0	0	0	0	0	0	0	0	0	0	0	0	0	0	0	0	0	0	0	0	0	0	0
	914		0	0	0	0	0	0	0	0	0	0	0	0	0	0	0	1	0	0	0	0	0	0	0	0	0	0	0	0	0	0	0	0	0	0	0	0	0	0	0	0	0	0	0	0	0	0	0
	915		0	0	0	0	0	0	0	0	0	0	0	0	0	0	0	0	0	0	0	0	0	0	0	0	0	0	0	0	0	0	0	0	0	0	0	0	0	0	0	0	0	0	0	0	0	0	0
	916		0	0	0	0	0	0	0	0	0	0	1	0	0	0	0	0	0	0	0	0	0	0	0	0	0	0	0	0	0	0	0	0	0	0	0	0	0	0	0	0	0	0	0	0	0	0	0
	917		0	0	0	0	0	0	0	0	0	0	0	0	0	0	0	0	0	0	0	0	0	0	0	1	0	0	0	0	0	0	0	0	0	0	0	0	0	0	0	0	0	0	0	0	0	0	0
	918		0	0	0	0	0	0	0	0	0	0	0	0	0	0	0	0	1	0	0	0	0	0	0	0	0	0	0	0	0	0	0	0	0	0	0	0	0	0	0	0	0	0	0	0	0	0	0
	919		0	0	0	0	0	0	0	0	0	0	0	0	1	0	0	0	0	0	0	0	0	0	0	0	0	0	0	0	0	0	0	0	0	0	0	0	0	0	0	0	0	0	0	0	0	0	0
	920		0	0	0	0	0	0	0	0	0	0	0	0	0	0	0	0	0	0	1	0	0	0	0	0	0	0	0	0	0	0	0	0	0	0	0	0	0	0	0	0	0	0	0	0	0	0	0
	921		0	0	0	0	0	0	0	0	0	0	0	0	1	0	0	0	0	0	0	0	0	0	0	0	0	0	0	0	0	0	0	0	0	0	0	0	0	0	0	0	0	0	0	0	0	0	0
	922		0	0	0	0	0	0	0	0	0	0	0	0	1	0	0	0	0	0	0	0	0	0	0	0	0	0	0	0	0	0	0	0	0	0	0	0	0	0	0	0	0	0	0	0	0	0	0
	923		0	0	0	0	0	0	0	0	0	0	0	0	0	0	0	0	0	0	0	0	1	0	0	0	0	0	0	0	0	0	0	0	0	0	0	0	0	0	0	0	0	0	0	0	0	0	0
	924		0	0	0	0	0	0	0	0	0	0	0	0	0	0	0	0	0	0	0	0	0	0	0	0	0	0	0	0	0	0	0	0	0	0	0	0	0	0	0	0	0	0	0	0	0	0	0
	925		0	0	0	0	0	0	0	0	0	0	0	0	1	0	0	0	0	0	0	0	0	0	0	0	0	0	0	0	0	0	0	0	0	0	0	0	0	0	0	0	0	0	0	0	0	0	0
	926		0	0	0	0	0	0	0	0	0	0	0	0	0	0	0	0	0	0	0	0	0	0	0	0	0	0	0	0	0	0	0	0	0	0	0	0	0	0	0	0	0	0	0	0	0	0	0
	927		0	0	0	0	0	0	0	0	0	0	0	0	0	0	0	0	0	0	0	0	0	0	0	0	0	0	0	0	0	0	0	0	0	0	0	0	0	0	0	0	0	0	0	0	0	0	0
	928		0	0	0	0	0	0	0	1	0	0	0	0	0	0	0	0	0	0	0	0	0	0	0	0	0	0	0	0	0	0	0	0	0	0	0	0	0	0	0	0	0	0	0	0	0	0	0
	929		0	1	0	0	0	0	0	0	0	0	0	0	0	0	0	0	0	0	0	0	0	0	0	0	0	0	0	0	0	0	0	0	0	0	0	0	0	0	0	0	0	0	0	0	0	0	0
	930		0	0	0	0	0	0	0	0	0	1	0	0	0	0	0	0	0	0	0	0	0	0	0	0	0	0	0	0	0	0	0	0	0	0	0	0	0	0	0	0	0	0	0	0	0	0	0
	931		0	0	0	0	0	0	0	0	0	0	0	0	0	0	0	0	0	0	0	0	0	0	0	0	0	0	0	0	0	0	0	0	0	0	0	0	0	0	0	0	0	0	0	0	0	0	0
	932		0	1	0	0	0	0	0	0	0	0	0	0	0	0	0	0	0	0	0	0	0	0	0	0	0	0	0	0	0	0	0	0	0	0	0	0	0	0	0	0	0	0	0	0	0	0	0
	933		0	1	0	0	0	0	0	0	0	0	0	0	0	0	0	0	0	0	0	0	0	0	0	0	0	0	0	0	0	0	0	0	0	0	0	0	0	0	0	0	0	0	0	0	0	0	0
	934		0	1	0	0	0	0	0	0	0	0	0	0	0	0	0	0	0	0	0	0	0	0	0	0	0	0	0	0	0	0	0	0	0	0	0	0	0	0	0	0	0	0	0	0	0	0	0
	935		0	0	0	0	0	0	0	0	0	0	0	0	0	0	0	0	0	0	0	0	0	0	0	0	0	0	0	0	0	0	0	0	0	0	0	0	0	0	0	0	0	0	0	0	0	0	0
	936		0	0	0	0	0	0	0	0	0	0	0	0	0	0	0	0	0	0	0	0	0	0	0	0	0	0	0	0	0	0	0	0	0	0	0	0	0	0	0	0	0	0	0	0	0	0	0
	937		0	0	0	0	0	0	0	0	0	0	0	0	0	0	0	0	0	0	0	0	0	0	0	0	0	0	0	0	0	0	0	0	0	0	0	0	0	0	0	0	0	0	0	0	0	0	0
	938		0	0	0	0	0	0	0	0	0	0	0	0	0	0	0	0	0	0	1	0	0	0	0	0	0	0	0	0	0	0	0	0	0	0	0	0	0	0	0	0	0	0	0	0	0	0	0
	939		0	0	0	0	0	0	0	0	0	0	0	0	0	0	0	0	0	0	0	0	0	0	0	0	0	0	0	0	0	0	0	0	0	0	0	0	0	0	0	0	0	0	0	0	0	0	0
	940		0	0	0	0	0	0	0	1	0	0	0	0	0	0	0	0	0	0	0	0	0	0	0	0	0	0	0	0	0	0	0	0	0	0	0	0	0	0	0	0	0	0	0	0	0	0	0
	941		0	0	0	0	0	0	0	0	0	0	0	0	0	0	0	0	0	0	0	0	0	0	0	0	0	0	0	0	0	0	0	0	0	0	0	0	0	0	0	0	0	0	0	0	0	0	0
	942		0	0	0	0	0	0	0	0	0	1	0	0	0	0	0	0	0	0	0	0	0	0	0	0	0	0	0	0	0	0	0	0	0	0	0	0	0	0	0	0	0	0	0	0	0	0	0
	943		0	0	0	0	0	0	0	0	0	0	0	0	0	0	0	0	0	0	0	0	1	0	0	0	0	0	0	0	0	0	0	0	0	0	0	0	0	0	0	0	0	0	0	0	0	0	0
	944		0	0	0	0	0	0	0	0	0	0	0	0	0	0	0	0	0	0	0	0	0	0	0	0	0	0	0	0	0	0	0	0	0	0	0	0	0	0	0	0	0	0	0	1	0	0	0
	945		0	0	0	0	0	0	0	0	0	0	1	0	0	0	0	0	0	0	0	0	0	0	0	0	0	0	0	0	0	0	0	0	0	0	0	0	0	0	0	0	0	0	0	0	0	0	0
	946		0	0	0	0	0	0	0	0	0	0	0	0	0	0	0	0	0	0	0	0	0	0	0	0	0	0	0	0	0	0	0	0	0	0	0	0	0	0	0	0	0	0	0	0	0	0	0
	947		0	0	0	0	0	0	0	0	0	1	0	0	0	0	0	0	0	0	0	0	0	0	0	0	0	0	0	0	0	0	0	0	0	0	0	0	0	0	0	0	0	0	0	0	0	0	0
	948		0	0	0	0	0	0	0	0	0	0	0	0	0	0	0	0	1	0	0	0	0	0	0	0	0	0	0	0	0	0	0	0	0	0	0	0	0	0	0	0	0	0	0	0	0	0	0
	949		0	0	0	0	0	0	0	0	0	0	0	0	0	0	0	0	1	0	0	0	0	0	0	0	0	0	0	0	0	0	0	0	0	0	0	0	0	0	0	0	0	0	0	0	0	0	0
	950		0	1	0	0	0	0	0	0	0	0	0	0	0	0	0	0	0	0	0	0	0	0	0	0	0	0	0	0	0	0	0	0	0	0	0	0	0	0	0	0	0	0	0	0	0	0	0
	951		0	0	0	0	0	0	0	0	0	0	0	0	0	0	0	0	0	0	0	0	0	0	0	0	0	0	0	0	0	0	0	0	0	0	0	0	0	0	0	0	0	0	0	0	0	0	0
	952		0	0	0	0	0	0	0	0	0	0	0	0	0	0	0	0	0	0	1	0	0	0	0	0	0	0	0	0	0	0	0	0	0	0	0	0	0	0	0	0	0	0	0	0	0	0	0
	953		0	0	0	0	0	0	0	0	0	0	0	0	0	0	0	0	0	0	0	0	0	0	0	0	0	0	0	0	0	0	0	0	0	0	1	0	0	0	0	0	0	0	0	0	0	0	0
	954		0	0	0	0	0	0	0	0	0	0	0	0	0	0	0	0	0	0	0	0	0	0	0	0	0	0	0	0	0	0	0	0	0	0	0	0	0	0	0	0	0	0	1	0	0	0	0
	955		0	1	0	0	0	0	0	0	0	0	0	0	0	0	0	0	0	0	0	0	0	0	0	0	0	0	0	0	0	0	0	0	0	0	0	0	0	0	0	0	0	0	0	0	0	0	0
	956		0	1	0	0	0	0	0	0	0	0	0	0	0	0	0	0	0	0	0	0	0	0	0	0	0	0	0	0	0	0	0	0	0	0	0	0	0	0	0	0	0	0	0	0	0	0	0
	957		0	0	0	0	0	0	0	1	0	0	0	0	0	0	0	0	0	0	0	0	0	0	0	0	0	0	0	0	0	0	0	0	0	0	0	0	0	0	0	0	0	0	0	0	0	0	0
	958		0	1	0	0	0	0	0	0	0	0	0	0	0	0	0	0	0	0	0	0	0	0	0	0	0	0	0	0	0	0	0	0	0	0	0	0	0	0	0	0	0	0	0	0	0	0	0
	959		0	0	0	0	0	0	0	0	0	0	0	0	0	0	0	0	0	0	0	0	0	0	0	0	0	0	0	0	0	0	0	0	0	0	0	0	0	0	0	0	0	0	0	0	0	0	0
	960		0	0	0	0	0	0	0	0	0	0	0	0	0	0	0	0	0	0	0	0	0	0	0	0	0	0	0	0	0	0	0	0	0	0	0	0	0	0	0	0	0	0	0	0	0	0	0
	961		0	0	0	0	0	0	0	0	0	0	0	0	0	0	0	0	0	0	0	0	0	0	0	0	0	0	0	0	0	0	0	0	0	1	0	0	0	0	0	0	0	0	0	0	0	0	0
	962		0	0	0	0	0	0	0	1	0	0	0	0	0	0	0	0	0	0	0	0	0	0	0	0	0	0	0	0	0	0	0	0	0	0	0	0	0	0	0	0	0	0	0	0	0	0	0
	963		0	1	0	0	0	0	0	0	0	0	0	0	0	0	0	0	0	0	0	0	0	0	0	0	0	0	0	0	0	0	0	0	0	0	0	0	0	0	0	0	0	0	0	0	0	0	0
	964		0	1	0	0	0	0	0	0	0	0	0	0	0	0	0	0	0	0	0	0	0	0	0	0	0	0	0	0	0	0	0	0	0	0	0	0	0	0	0	0	0	0	0	0	0	0	0
	965		0	0	0	0	0	0	0	0	0	0	0	0	0	0	0	0	0	0	0	0	0	0	0	0	0	0	1	0	0	0	0	0	0	0	0	0	0	0	0	0	0	0	0	0	0	0	0
	966		0	0	0	0	0	0	0	0	0	0	0	0	0	0	0	0	0	0	0	0	0	0	0	0	0	0	0	0	0	0	0	0	0	0	0	0	0	0	0	0	0	0	0	0	0	1	0
	967		0	0	0	0	0	0	0	0	0	0	0	0	0	0	0	0	0	0	0	0	0	0	0	0	0	0	0	0	0	0	0	0	0	0	0	0	0	0	0	0	0	0	0	0	0	1	0
	968		0	0	0	0	0	0	0	0	0	0	0	0	0	0	0	0	0	0	0	0	0	0	0	0	0	0	0	0	0	0	0	0	0	0	0	0	0	0	0	0	0	0	0	0	0	0	0
	969		0	0	0	0	0	0	0	0	0	0	0	0	0	0	0	0	0	0	0	0	0	0	0	0	0	0	0	0	0	0	0	0	0	0	1	0	0	0	0	0	0	0	0	0	0	0	0
	970		0	0	0	0	0	0	0	0	0	0	0	0	0	0	0	0	0	0	0	0	0	0	0	0	0	0	0	0	0	0	0	0	0	0	1	0	0	0	0	0	0	0	0	0	0	0	0
	971		0	0	0	0	0	0	0	0	0	0	0	0	0	0	0	0	0	0	0	0	0	0	0	0	1	0	0	0	0	0	0	0	0	0	0	0	0	0	0	0	0	0	0	0	0	0	0
	972		0	0	0	0	0	0	0	0	0	0	0	0	0	0	0	0	0	0	0	0	0	0	0	0	0	0	0	0	0	0	0	0	0	0	0	0	0	0	0	0	0	0	0	0	0	0	0
	973		0	0	0	0	0	0	0	0	0	0	0	0	0	0	0	0	0	0	0	0	0	0	0	0	0	0	0	0	0	0	0	0	0	0	0	0	0	0	0	0	0	0	0	0	0	1	0
	974		0	1	0	0	0	0	0	0	0	0	0	0	0	0	0	0	0	0	0	0	0	0	0	0	0	0	0	0	0	0	0	0	0	0	0	0	0	0	0	0	0	0	0	0	0	0	0
	975		0	1	0	0	0	0	0	0	0	0	0	0	0	0	0	0	0	0	0	0	0	0	0	0	0	0	0	0	0	0	0	0	0	0	0	0	0	0	0	0	0	0	0	0	0	0	0
	976		0	0	0	0	0	0	0	0	0	0	0	0	0	0	0	0	0	0	0	0	0	0	0	0	0	0	0	0	0	0	0	0	0	0	0	0	0	0	0	0	0	0	0	0	0	0	0
	977		0	0	0	0	0	0	0	0	0	0	0	0	0	0	0	0	0	0	0	0	0	0	0	0	0	0	0	0	0	0	0	0	0	0	1	0	0	0	0	0	0	0	0	0	0	0	0
	978		0	0	0	0	0	0	0	0	0	0	0	0	0	0	0	0	0	0	0	0	0	0	0	0	0	0	0	0	0	0	0	0	0	0	0	0	0	0	0	0	0	0	0	0	0	0	0
	979		0	0	0	0	0	0	0	0	0	0	0	0	0	0	0	0	0	0	0	0	0	0	0	0	0	0	0	0	0	0	0	0	0	0	0	0	0	0	0	0	0	0	0	0	0	0	0
	980		0	0	0	0	0	0	0	1	0	0	0	0	0	0	0	0	0	0	0	0	0	0	0	0	0	0	0	0	0	0	0	0	0	0	0	0	0	0	0	0	0	0	0	0	0	0	0
	981		0	1	0	0	0	0	0	0	0	0	0	0	0	0	0	0	0	0	0	0	0	0	0	0	0	0	0	0	0	0	0	0	0	0	0	0	0	0	0	0	0	0	0	0	0	0	0
	982		0	0	0	0	0	0	0	0	0	0	0	0	0	0	0	0	0	0	0	0	0	0	0	0	0	0	0	0	0	0	0	0	0	0	0	0	0	0	0	0	0	0	0	0	0	1	0
	983		0	0	0	0	0	0	0	0	0	0	0	0	0	0	0	0	0	0	0	0	0	0	0	0	0	0	0	0	0	0	0	0	0	0	1	0	0	0	0	0	0	0	0	0	0	0	0
	984		0	0	0	0	0	0	0	0	0	0	0	0	0	0	0	0	0	0	0	0	0	0	0	0	0	0	0	0	0	0	0	0	0	0	0	0	0	0	0	0	0	0	0	0	0	0	0
	985		0	0	0	0	0	0	0	0	0	0	0	0	0	0	0	0	0	0	0	0	0	0	0	0	0	0	0	0	0	0	0	0	0	0	0	0	0	0	0	0	0	0	0	0	0	0	0
	986		0	0	0	0	0	0	0	0	0	0	0	0	0	0	0	0	0	0	0	0	0	0	0	0	0	0	0	0	0	0	0	0	0	0	0	0	0	0	0	0	0	0	0	0	1	0	0
	987		0	0	0	0	0	0	0	0	0	0	0	0	0	0	0	0	0	0	0	0	0	0	0	0	0	0	0	0	0	0	0	0	0	0	0	0	0	0	0	0	0	0	0	0	0	0	0
	988		0	0	0	0	0	0	0	0	0	0	0	0	0	0	0	0	0	0	0	0	0	0	0	0	0	0	0	0	0	0	0	0	0	0	0	0	0	0	0	0	0	0	0	0	0	0	1
	989		0	0	0	0	0	0	0	0	0	0	0	0	0	0	0	0	0	0	0	0	0	0	0	0	0	0	0	0	0	0	0	0	0	0	0	0	0	0	0	0	0	0	0	0	0	0	0
	990		0	0	0	0	0	0	0	0	0	0	0	0	0	0	0	0	0	0	0	0	0	0	0	0	0	0	0	0	0	0	0	0	0	0	0	0	0	0	0	0	0	0	0	0	0	0	0
	991		0	0	0	0	0	0	0	0	0	0	0	0	1	0	0	0	0	0	0	0	0	0	0	0	0	0	0	0	0	0	0	0	0	0	0	0	0	0	0	0	0	0	0	0	0	0	0
	992		0	0	0	0	0	0	0	0	0	0	0	0	0	0	0	0	0	0	0	0	0	0	0	0	0	0	0	0	0	0	0	0	0	0	0	0	0	0	0	0	0	0	0	0	0	0	0
	993		0	0	0	0	0	0	0	0	0	0	0	0	0	0	0	0	0	0	0	0	0	0	0	0	0	0	0	0	0	0	0	0	0	0	0	0	0	0	0	0	0	0	0	0	0	0	0
	994		0	0	0	0	0	0	0	0	0	0	0	0	0	0	0	0	0	0	0	0	0	0	0	0	1	0	0	0	0	0	0	0	0	0	0	0	0	0	0	0	0	0	0	0	0	0	0
	995		0	0	0	0	0	0	0	0	0	0	0	0	0	0	0	0	0	0	0	0	0	0	0	0	0	0	0	0	0	0	0	0	0	0	0	0	0	0	0	0	0	0	0	0	0	0	0
	996		0	0	0	0	0	0	0	0	0	0	0	0	0	0	0	0	0	0	0	0	0	0	0	0	1	0	0	0	0	0	0	0	0	0	0	0	0	0	0	0	0	0	0	0	0	0	0
	997		0	0	0	0	0	0	0	0	0	0	0	0	0	0	0	0	0	0	0	0	0	0	0	0	0	0	0	0	0	0	0	0	0	0	0	0	0	0	0	0	0	0	0	0	0	1	0
	998		0	0	0	0	0	0	0	0	0	0	0	0	0	0	0	0	0	0	0	0	0	0	0	0	0	0	0	0	0	0	0	0	0	0	0	0	0	0	0	0	0	0	0	0	0	0	0
	999		0	0	0	0	0	0	0	0	0	0	0	0	0	0	0	0	0	0	0	0	0	0	0	0	0	0	0	0	0	0	0	0	0	0	0	0	0	0	0	0	0	0	0	0	0	0	0
	1000		0	0	0	0	0	0	0	0	0	0	0	0	0	0	0	0	0	0	0	0	0	0	0	0	0	0	0	0	0	0	0	0	0	1	0	0	0	0	0	0	0	0	0	0	0	0	0
	1001		0	0	0	0	0	0	0	0	0	0	0	0	0	0	0	0	0	0	0	0	0	0	0	0	0	0	0	0	0	0	0	0	0	0	1	0	0	0	0	0	0	0	0	0	0	0	0
	1002		0	0	0	0	0	0	0	0	0	0	0	0	0	0	0	0	0	0	0	0	1	0	0	0	0	0	0	0	0	0	0	0	0	0	0	0	0	0	0	0	0	0	0	0	0	0	0
	1003		0	0	0	0	0	0	0	0	0	0	0	0	0	0	0	0	0	0	0	0	0	0	0	0	0	0	0	0	0	0	0	0	0	0	0	0	0	0	0	0	0	0	0	0	0	0	0
	1004		0	0	1	0	0	0	0	0	0	0	0	0	0	0	0	0	0	0	0	0	0	0	0	0	0	0	0	0	0	0	0	0	0	0	0	0	0	0	0	0	0	0	0	0	0	0	0
	1005		0	0	0	0	0	0	0	0	0	1	0	0	0	0	0	0	0	0	0	0	0	0	0	0	0	0	0	0	0	0	0	0	0	0	0	0	0	0	0	0	0	0	0	0	0	0	0
	1006		0	0	0	0	0	0	0	0	0	0	0	0	0	0	0	0	0	0	1	0	0	0	0	0	0	0	0	0	0	0	0	0	0	0	0	0	0	0	0	0	0	0	0	0	0	0	0
	1007		0	0	0	0	0	0	0	0	0	0	0	0	0	0	0	0	0	0	0	0	0	0	0	0	0	0	0	0	0	0	0	0	0	0	0	0	0	0	0	0	0	0	0	0	0	0	0
	1008		0	0	0	0	0	0	0	0	0	0	0	0	0	0	0	0	0	0	0	0	0	0	0	0	0	0	0	0	0	0	0	0	0	0	0	0	0	0	0	0	0	0	0	0	0	0	0
	1009		0	0	0	0	0	0	0	0	0	0	0	0	0	0	0	0	0	0	0	0	0	0	0	0	0	0	0	0	0	0	0	0	0	0	0	0	0	0	0	0	0	0	0	0	0	0	0
	1010		0	0	0	0	0	0	0	0	0	0	0	0	0	0	0	0	0	0	0	0	0	0	0	0	0	0	0	0	0	0	0	0	0	0	0	0	0	0	0	0	0	0	0	0	0	0	0
	1011		0	0	0	0	0	0	0	0	0	0	0	0	0	0	0	0	0	0	0	0	0	0	0	0	0	0	0	0	0	0	0	0	0	0	0	0	0	0	0	0	0	0	0	0	0	1	0
	1012		0	0	0	0	0	0	0	0	0	0	0	0	0	0	0	0	0	0	0	0	0	0	0	0	0	0	0	0	0	1	0	0	0	0	0	0	0	0	0	0	0	0	0	0	0	0	0
	1013		0	0	0	0	0	0	0	0	0	0	0	0	0	0	0	0	0	0	0	0	0	0	0	0	0	0	0	0	0	0	0	0	0	0	0	0	0	0	0	0	0	0	0	0	0	0	0
	1014		0	1	0	0	0	0	0	0	0	0	0	0	0	0	0	0	0	0	0	0	0	0	0	0	0	0	0	0	0	0	0	0	0	0	0	0	0	0	0	0	0	0	0	0	0	0	0
	1015		0	0	0	0	0	0	0	0	0	0	0	0	0	0	0	0	0	0	0	0	0	0	0	0	0	0	1	0	0	0	0	0	0	0	0	0	0	0	0	0	0	0	0	0	0	0	0
	1016		0	0	0	0	0	0	0	1	0	0	0	0	0	0	0	0	0	0	0	0	0	0	0	0	0	0	0	0	0	0	0	0	0	0	0	0	0	0	0	0	0	0	0	0	0	0	0
	1017		0	0	1	0	0	0	0	0	0	0	0	0	0	0	0	0	0	0	0	0	0	0	0	0	0	0	0	0	0	0	0	0	0	0	0	0	0	0	0	0	0	0	0	0	0	0	0
	1018		0	0	0	0	0	0	0	0	0	0	0	0	0	0	0	0	0	0	0	0	0	0	0	0	0	0	0	0	0	0	0	0	0	0	0	0	0	0	0	0	0	0	0	0	0	0	0
	1019		0	0	0	0	0	0	0	0	0	1	0	0	0	0	0	0	0	0	0	0	0	0	0	0	0	0	0	0	0	0	0	0	0	0	0	0	0	0	0	0	0	0	0	0	0	0	0
	1020		0	0	0	0	0	0	0	0	0	0	0	0	0	0	0	0	0	0	0	0	0	0	0	0	0	0	0	0	0	0	0	0	0	0	0	0	0	0	0	0	0	0	0	0	0	0	0
	1021		0	1	0	0	0	0	0	0	0	0	0	0	0	0	0	0	0	0	0	0	0	0	0	0	0	0	0	0	0	0	0	0	0	0	0	0	0	0	0	0	0	0	0	0	0	0	0
	1022		0	0	0	0	0	0	0	0	0	0	0	0	0	0	0	0	0	0	0	0	1	0	0	0	0	0	0	0	0	0	0	0	0	0	0	0	0	0	0	0	0	0	0	0	0	0	0
	1023		0	0	0	0	0	0	0	0	0	0	0	0	0	0	0	0	0	0	0	0	0	0	0	0	0	0	0	0	0	0	0	0	0	0	0	0	0	0	0	0	0	0	0	0	0	0	0
	1024		0	0	0	0	0	0	0	0	0	0	0	0	0	0	0	0	0	0	0	0	0	0	0	0	1	0	0	0	0	0	0	0	0	0	0	0	0	0	0	0	0	0	0	0	0	0	0
	1025		0	0	0	0	0	0	0	0	0	0	0	0	0	0	0	0	0	0	0	0	0	0	0	0	0	0	0	0	0	0	0	0	0	0	0	0	0	0	0	0	0	0	0	0	0	0	0
	1026		0	0	0	0	0	0	0	0	0	0	0	0	0	0	0	0	0	0	0	0	0	0	0	0	0	0	0	0	0	0	0	0	0	0	0	0	0	0	0	0	0	0	0	0	0	1	0
	1027		0	0	0	0	0	0	0	0	0	0	0	0	0	0	0	0	0	0	0	0	0	0	0	0	0	0	0	0	0	0	0	0	0	0	0	0	0	0	0	0	0	0	0	0	0	0	1
[truncated: 53 more columns]

## Sheet: S5
Genera and Species computed with VIRIDIC on the reference transposable phages
Representatives of these genera and species are indicated by 1 in the columns « Ref_species » and « Ref_genus »
genome	host	phage	name	species_cluster	Ref_species	genus_cluster	Ref_genus
NC_030918	Pseudomonas	phage	JBD93	1	1	1	0
JN808773	Pseudomonas	phage	F_HA0480sp/Pa1651	1	0	1	0
JN811560	Pseudomonas	phage	JBD26	2	1	2	0
JQ067085	Pseudomonas	phage	PaMx73	3	1	2	0
KP063903	Bacillus	phage	BalMu-1_2	4	0	3	0
NC_011613	Pseudomonas	phage	MP29	6	1	2	0
KT968832	Pseudomonas	phage	YMC11/11/R1836	6	0	2	0
NC_008717	Pseudomonas	phage	DMS3	15	1	1	0
NC_009237	Burkholderia	phage	phiE255	16	1	10	0
NC_020200	Pseudomonas	phage	JBD88a	17	1	1	0
NC_011611	Pseudomonas	phage	MP38	19	1	1	0
NC_013594	Escherichia	phage	D108	20	1	9	0
NC_018274	Pseudomonas	phage	MP42	22	1	1	0
NC_020198	Pseudomonas	phage	JBD30	24	1	1	0
NC_020202	Pseudomonas	phage	JBD5	25	1	2	0
NC_020203	Pseudomonas	phage	JBD24	26	1	1	0
NC_020866	Rhodovulum	phage	RS1	27	0	15	0
NC_023700	Pseudomonas	phage	PA1/KOR/2010	30	1	2	0
NC_024330	Pseudomonas	phage	JD024	31	1	2	0
NC_024782	Pseudomonas	phage	MP48	32	1	2	0
NC_026601	Pseudomonas	phage	vB_PaeS_PAO1_Ab30	33	1	1	0
NC_027298	Pseudomonas	phage	LPB1	34	1	2	0
NC_027382	Enterobacteria	phage	SfMu	35	1	9	0
NC_027384	Pseudomonas	phage	H70	36	1	2	0
NC_028667	Pseudomonas	phage	vB_PaeS_PM105	39	1	18	0
NC_030908	Pseudomonas	phage	JBD69	42	1	1	0
NC_048679	Leptospira	phage	LE4	45	1	23	0
NC_030945	Bacillus	phage	BalMu-1_1	4	1	3	1
KT381864	Thiobacimonas	phage	vB_ThpS-P1	5	1	4	1
KX669658	Ochrobactrum	phage	POA1180	7	1	5	1
KY939598	Alteromonadaceae	phage	B23	8	1	6	1
MF975721	Pseudomonas	phage	VW-6B	9	1	7	1
MG711460	Faecalibacterium	phage	FP_Mushu	10	1	8	1
NC_000929	Enterobacteria	phage	Mu	11	1	9	1
NC_005178	Pseudomonas	phage	D3112	12	1	2	1
NC_005882	Burkholderia	phage	BcepMu	13	1	10	1
NC_006548	Pseudomonas	phage	B3	14	1	11	1
NC_009818	Pseudomonas	phage	MP22	17	1	1	1
NC_011216	Burkholderia	phage	KS10	18	1	12	1
NC_016165	Rhodobacter	phage	RcapMu	21	1	13	1
NC_019455	Haemophilus	phage	SuMu	23	1	14	1
NC_020839	Rhodobacter	phage	RC1	27	1	15	1
NC_021070	Vibrio	phage	martha_12B12	28	1	16	1
NC_021557	Rhizobium	phage	RR1-B	29	1	17	1
NC_027986	Pseudomonas	phage	JBD18	37	1	18	1
NC_027992	Pseudomonas	phage	JBD25	38	1	19	1
NC_028766	Mannheimia	phage	vB_MhM_3927AP2	40	1	20	1
NC_029107	Ralstonia	phage	RS138	41	1	21	1
NC_031059	Rhodovulum	phage	vB_RhkS_P1	43	1	22	1
NC_048678	Leptospira	phage	LE3	44	1	23	1
NC_048892	Leptospira	phage	LE1	46	1	24	1
